# Supplementary material for: Facile access to imidazole and imidazolium substituted dibenzo-diazocines
Source: Royal Society of Chemistry journal article supplement (doi:10.1039/c4nj00351a), 2014-01-01
Supplement: c4nj00351a1.pdf [file c4nj00351a1.pdf]

Supporting Information

## Facile Access to Imidazole and Imidazolium Substituted Dibenzo-Diazocines

Arruri Sathyanarayana and Ganesan Prabusankar\*

Department of Chemistry, Indian Institute of Technology Hyderabad, ODF Estate, Yeddumailaram,  
AP, INDIA 502 205. Fax: +91 40 2301 6032. E-mail: [prabu@iith.ac.in](mailto:prabu@iith.ac.in)

Figure S1:  $^1\text{H}$  NMR spectrum (400 MHz,  $\text{CDCl}_3$ , RT) of **3**

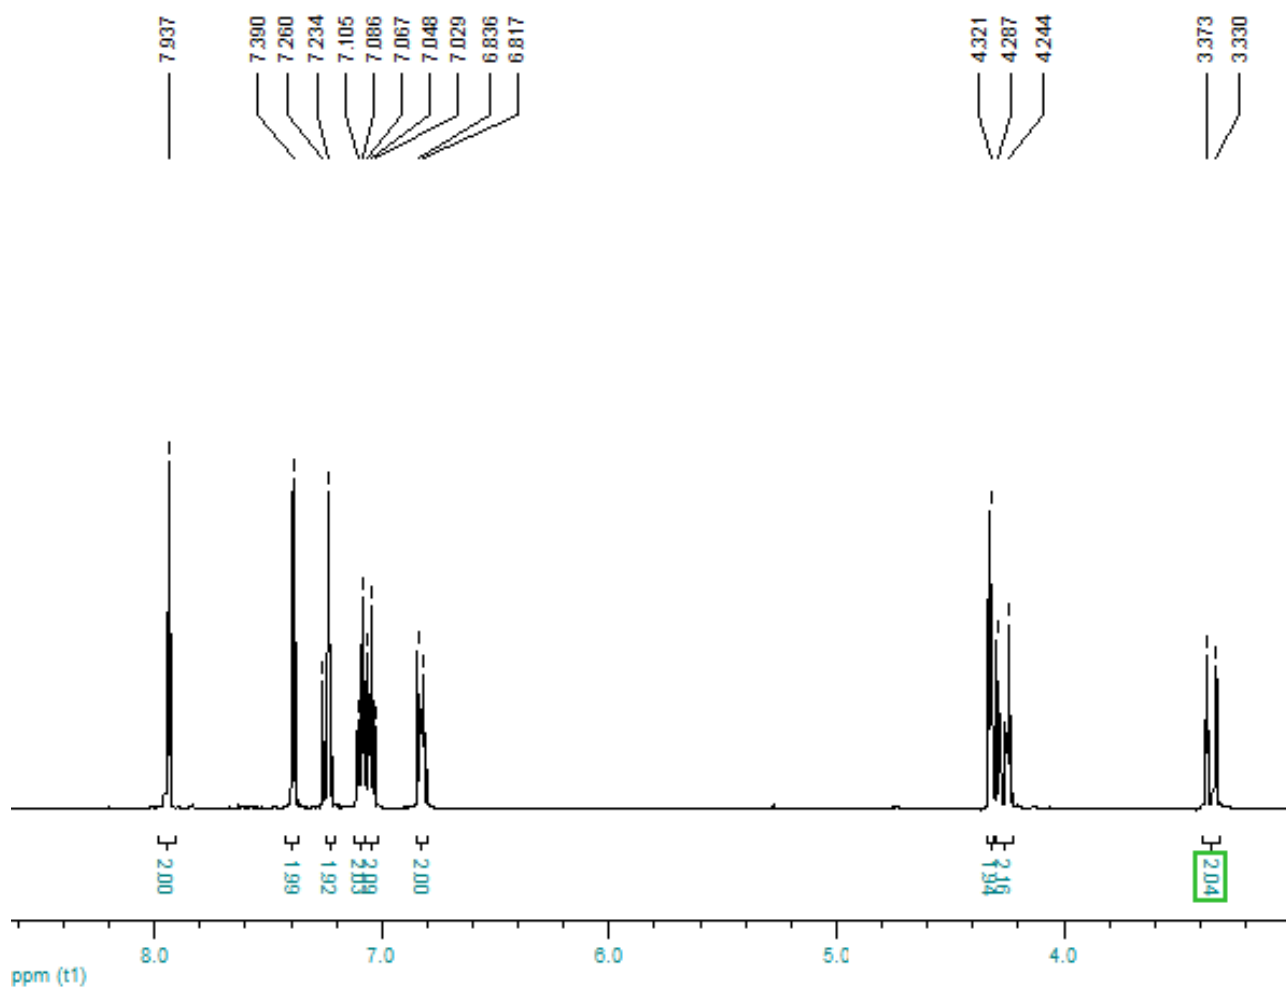

Supporting Information

Figure S2:  $^{13}\text{C}$  NMR spectrum (100 MHz,  $\text{CDCl}_3$ , RT) of 3

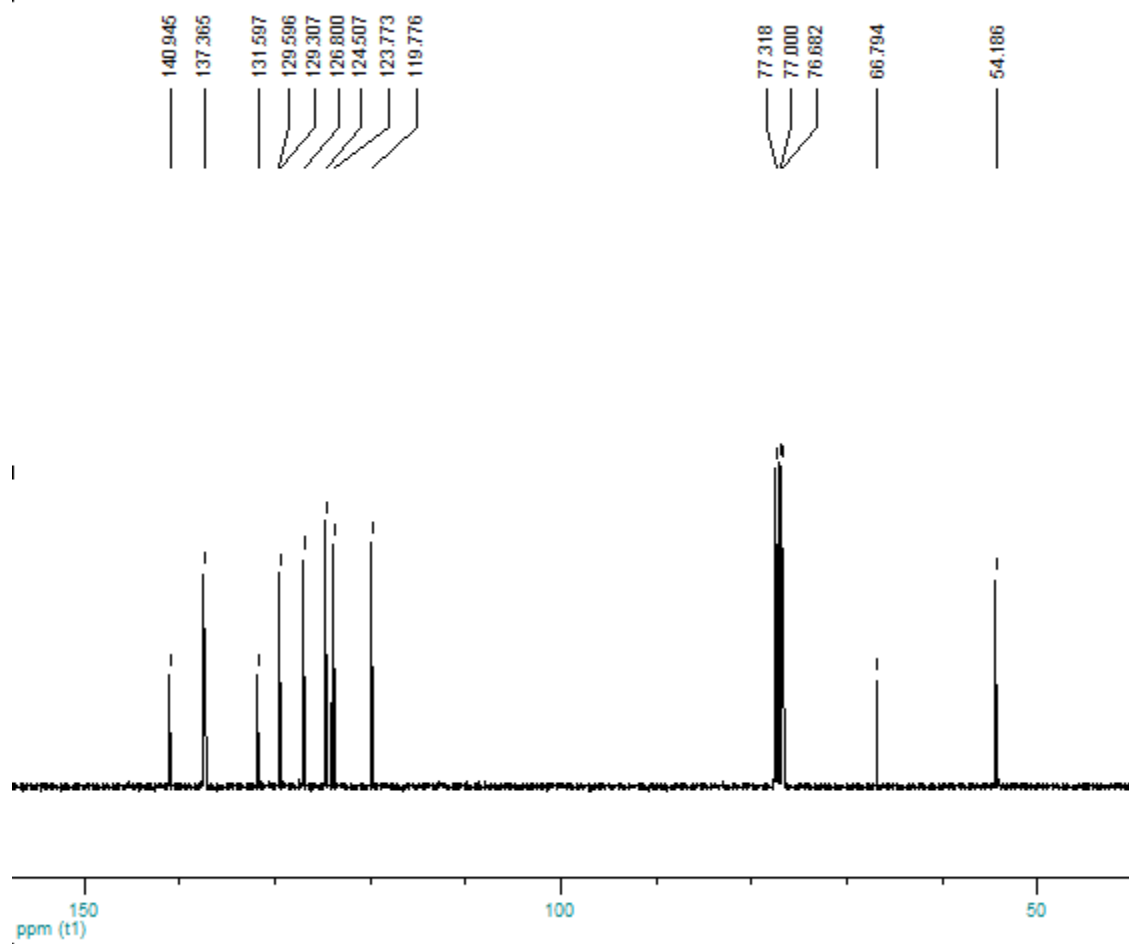

Supporting Information

Figure S3:  $^1\text{H}$  NMR spectrum (400 MHz,  $\text{DMSO-}d_6$ , RT) of 5

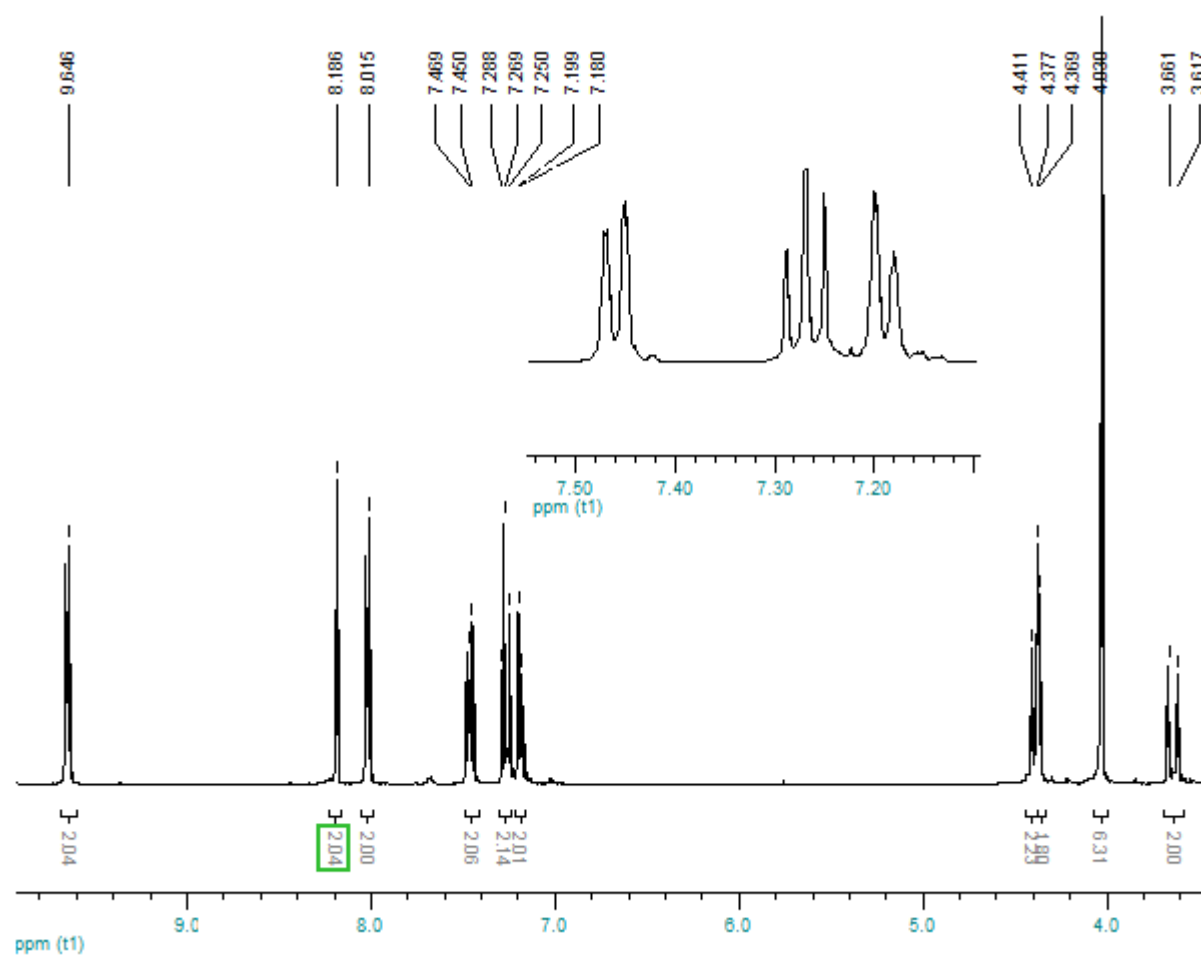

Supporting Information

Figure S4:  $^{13}\text{C}$  NMR spectrum (100 MHz,  $\text{DMSO-}d_6$ , RT) of 5

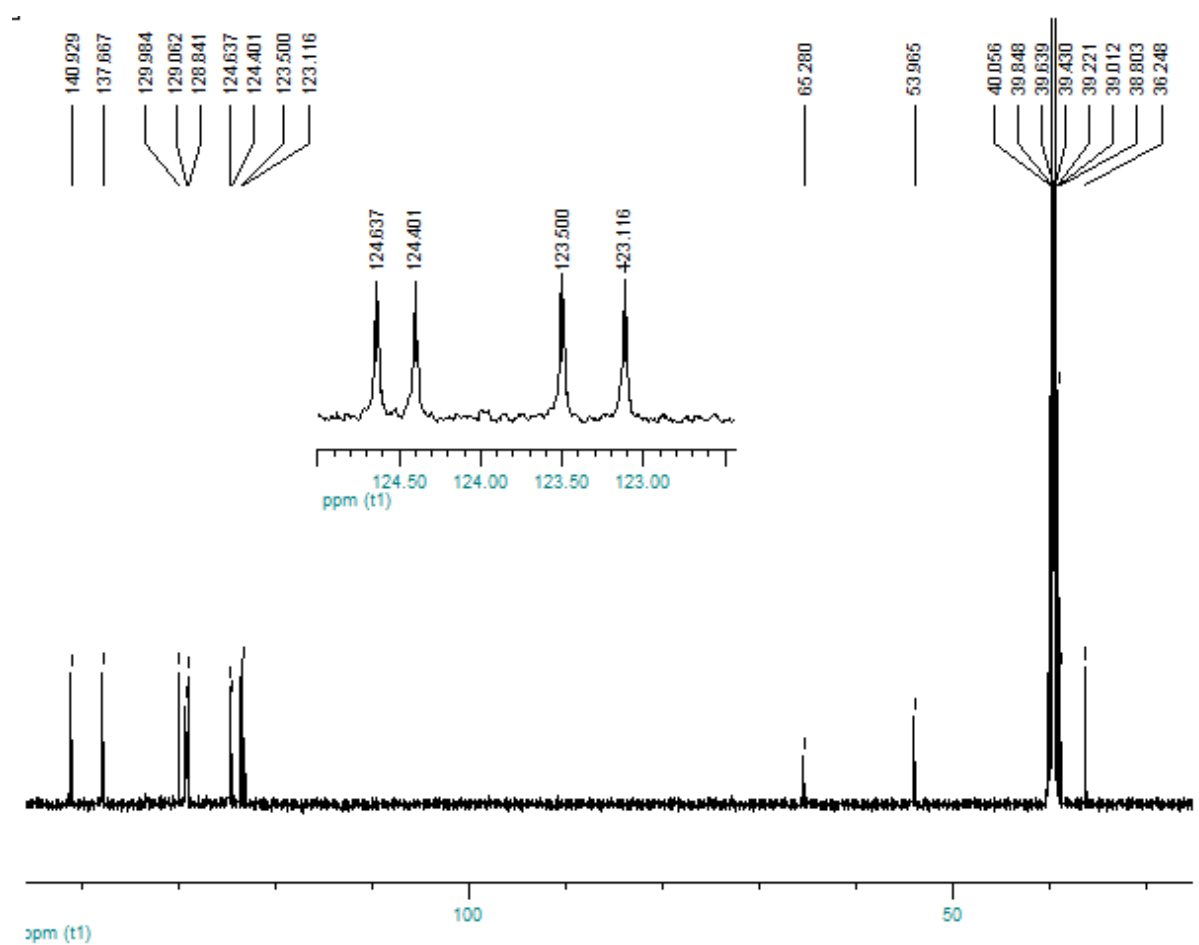

Supporting Information

Figure S5:  $^1\text{H}$  NMR spectrum (400 MHz,  $\text{DMSO-}d_6$ , RT) of **6**

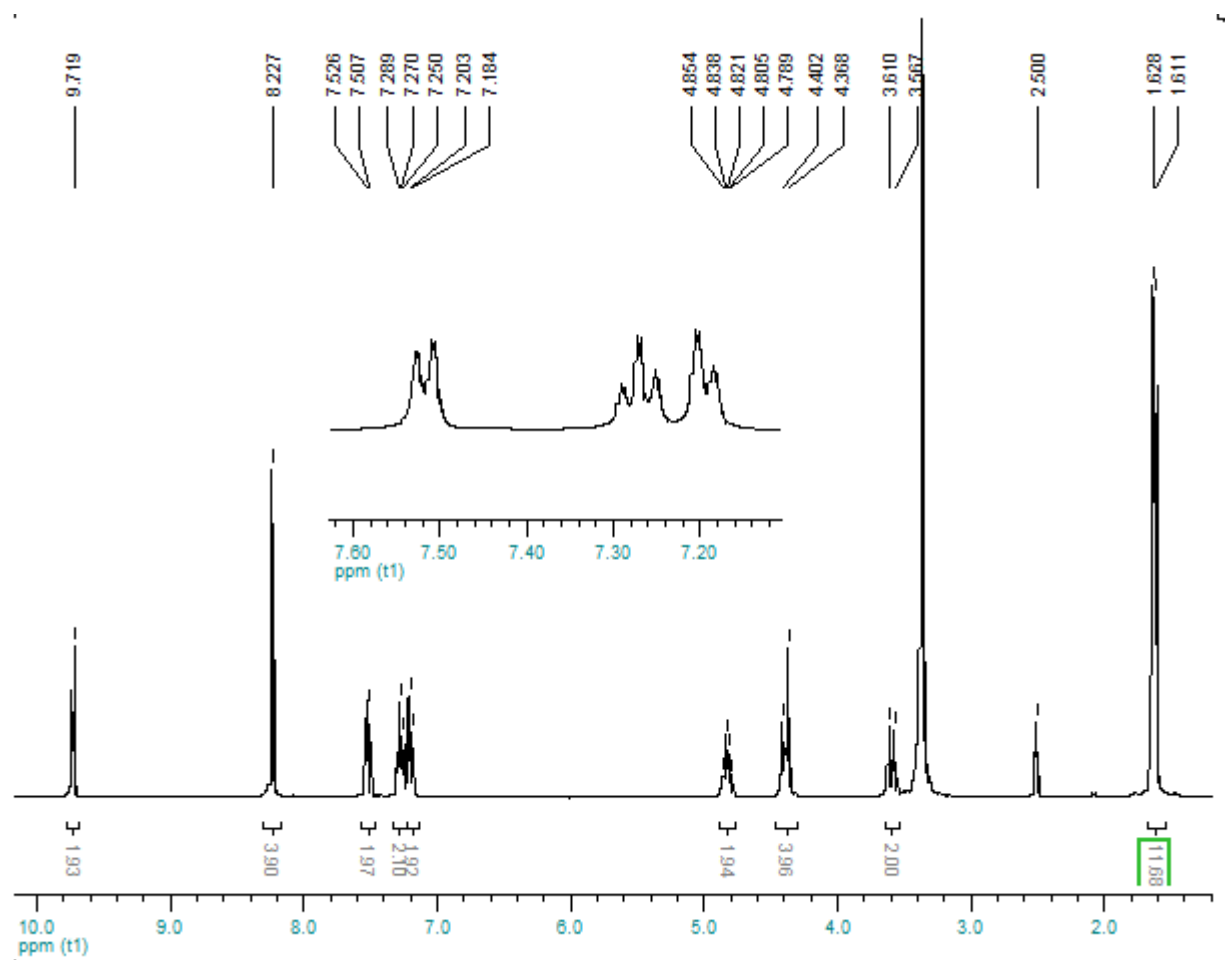

Supporting Information

Figure S6:  $^{13}\text{C}$  NMR spectrum (100 MHz,  $\text{DMSO-}d_6$ , RT) of **6**

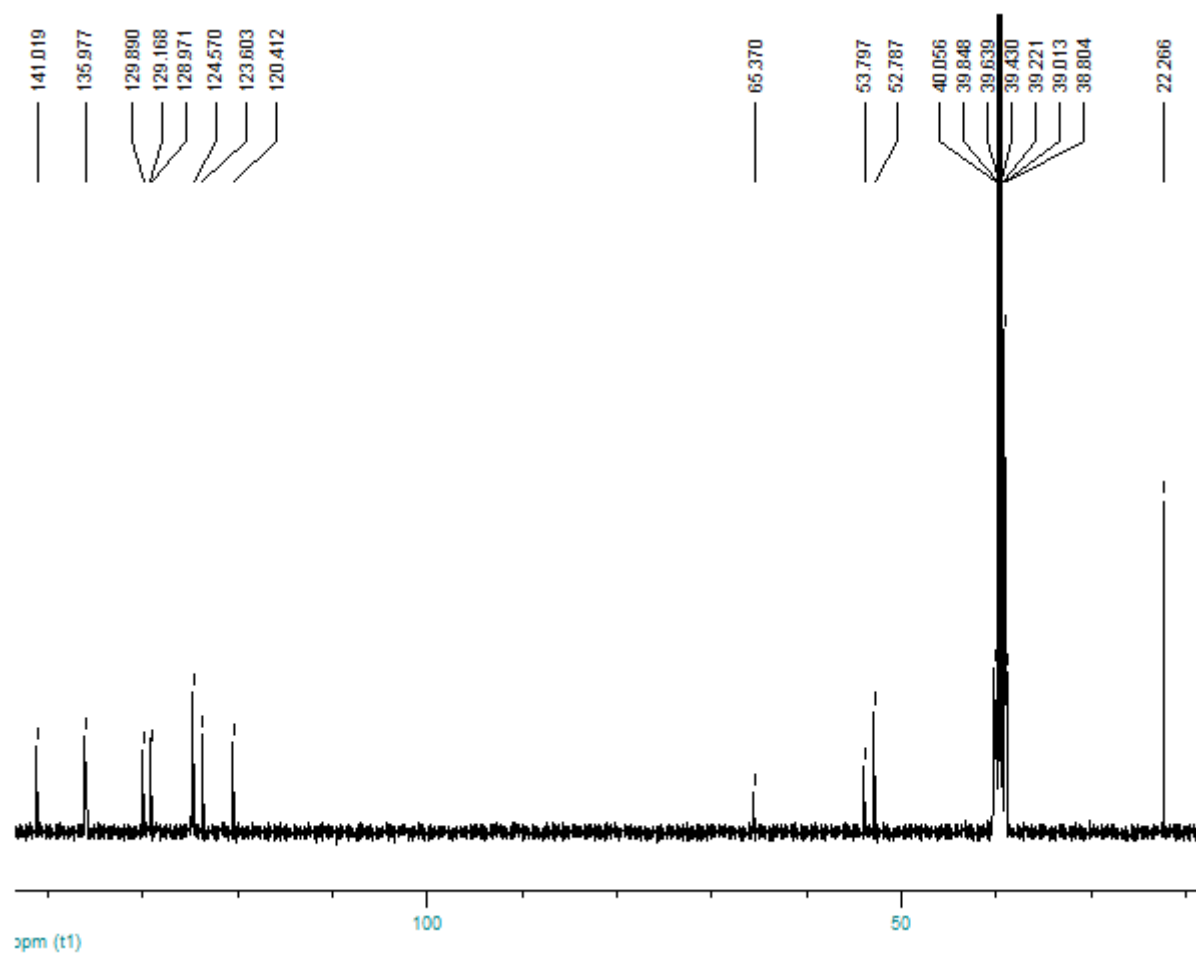

Supporting Information

Figure S7:  $^1\text{H}$  NMR spectrum (400 MHz,  $\text{DMSO-}d_6$ , RT) of 7

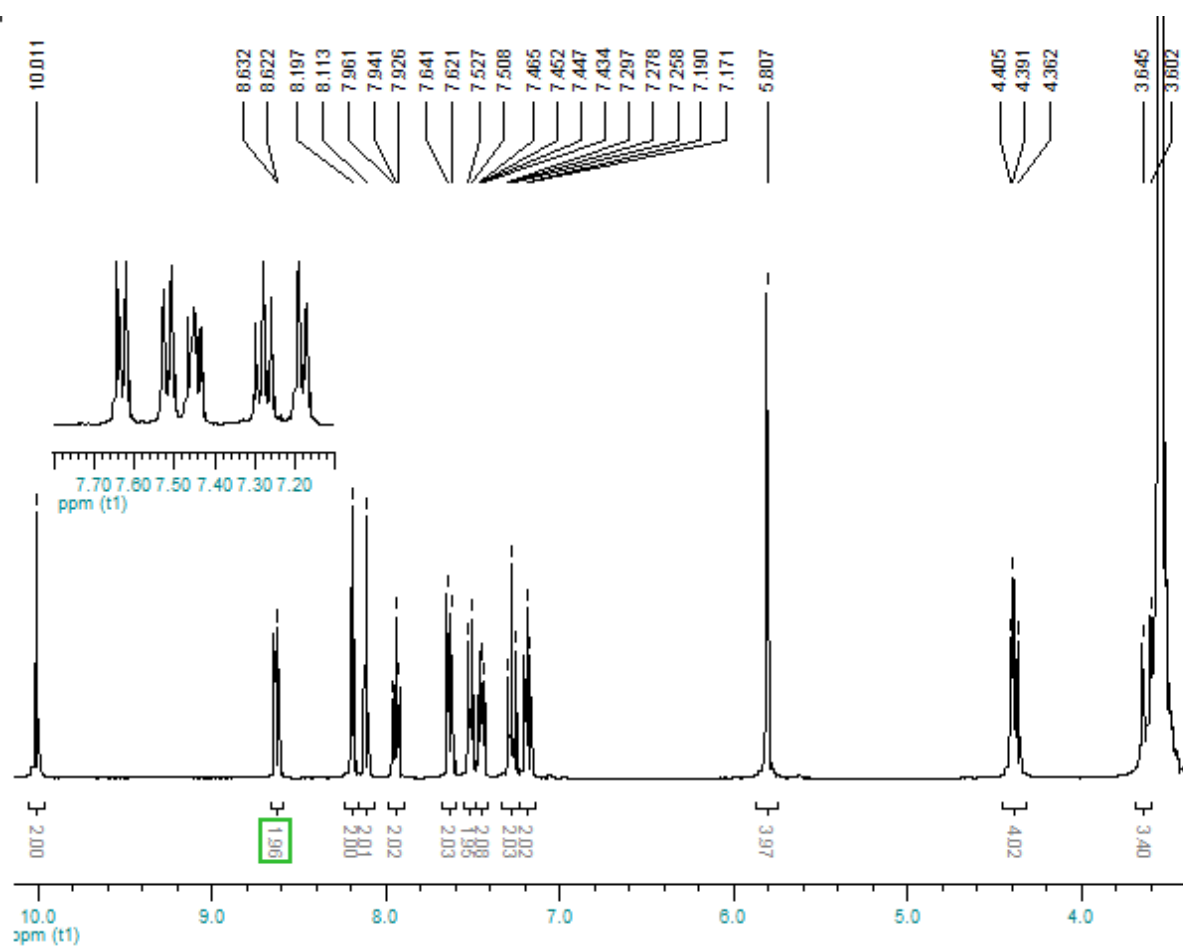

Supporting Information

Figure S8:  $^{13}\text{C}$  NMR spectrum (100 MHz,  $\text{DMSO-}d_6$ , RT) of 7

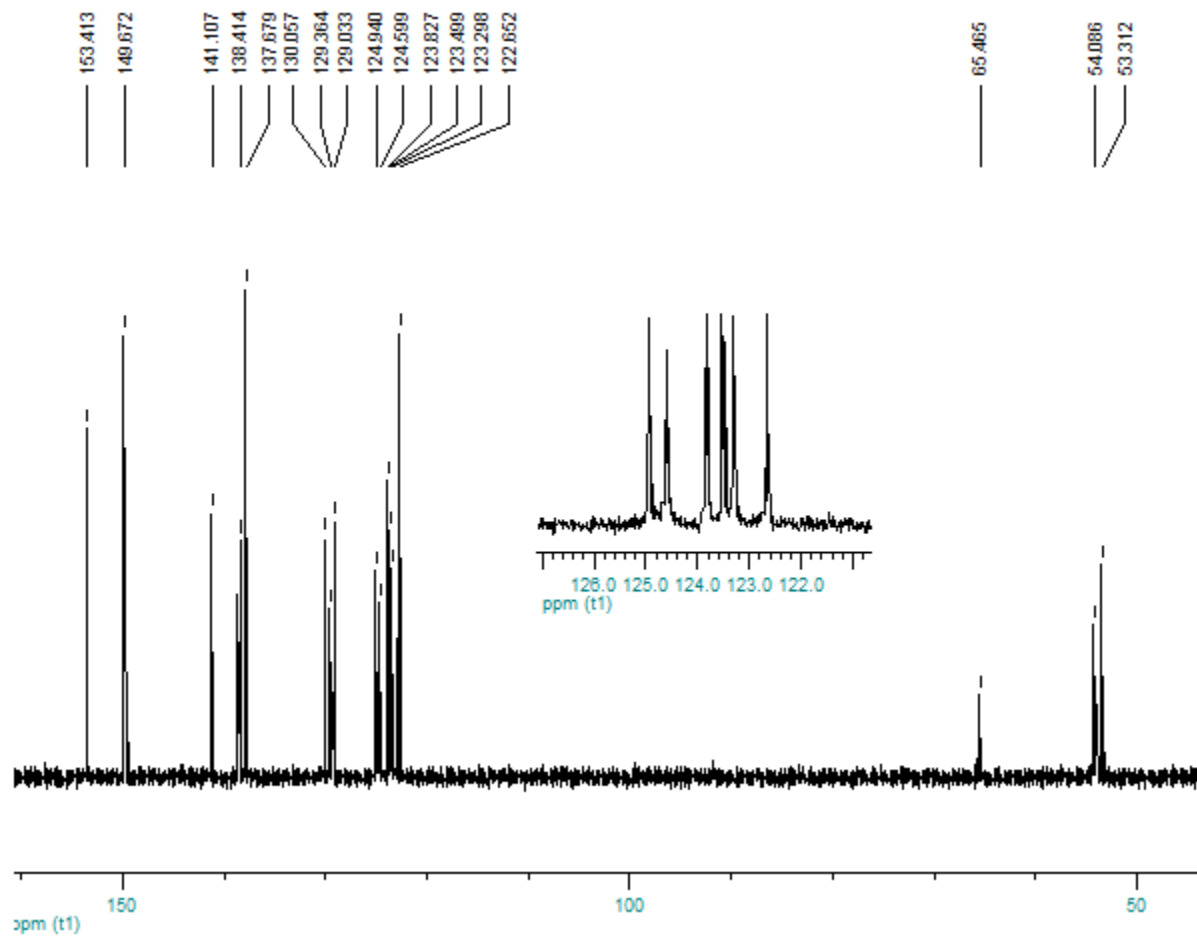



Supporting Information

Figure S9:  $^1\text{H}$  NMR spectrum (400 MHz,  $\text{DMSO-}d_6$ , RT) of **8**

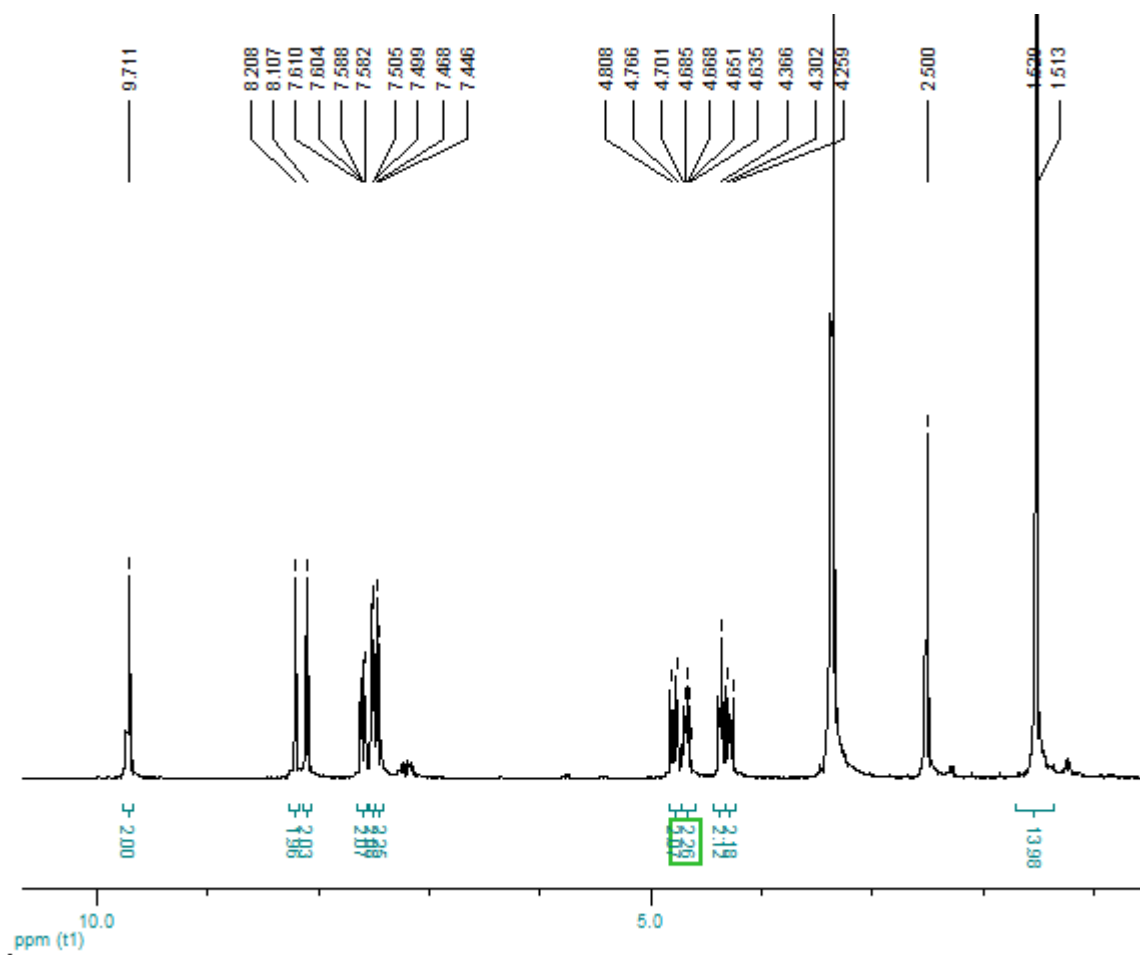

Supporting Information

Figure S10:  $^{13}\text{C}$  NMR spectrum (100 MHz,  $\text{DMSO-}d_6$ , RT) of 8

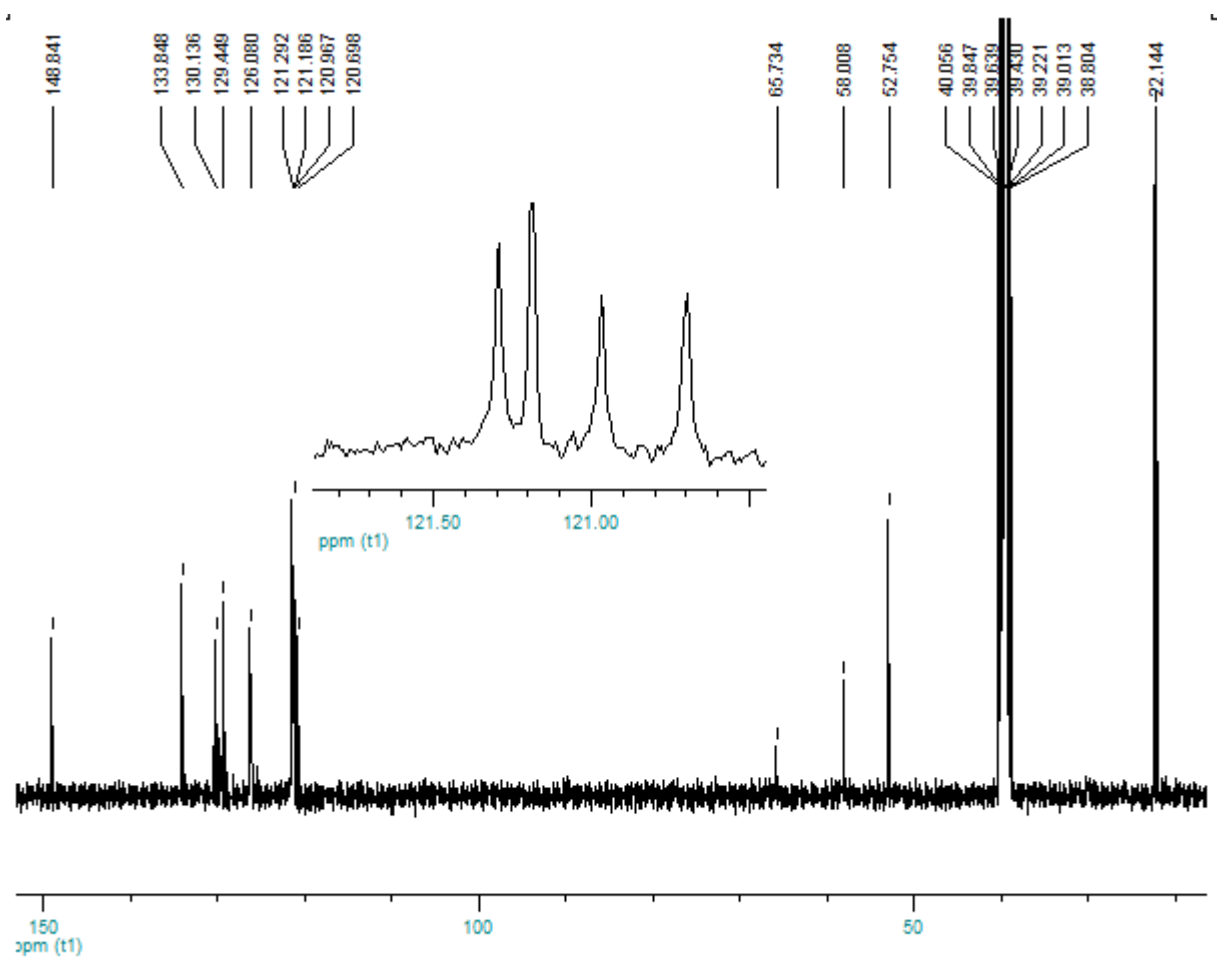

Supporting Information

Figure S11:  $^1\text{H}$  NMR spectrum (400 MHz,  $\text{DMSO-}d_6$ , RT) of 9

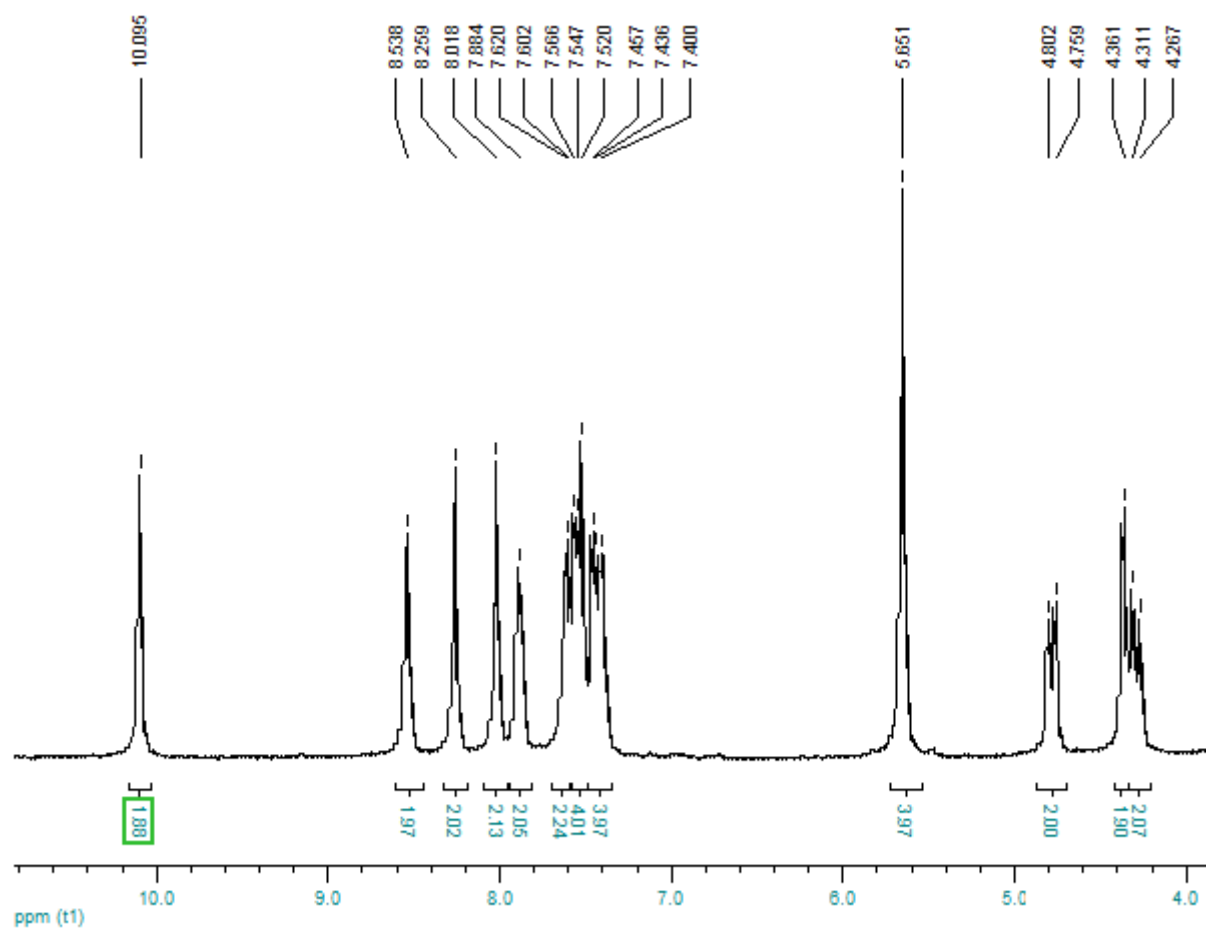

Supporting Information

Figure S12:  $^{13}\text{C}$  NMR spectrum (100 MHz,  $\text{DMSO-}d_6$ , RT) of 9

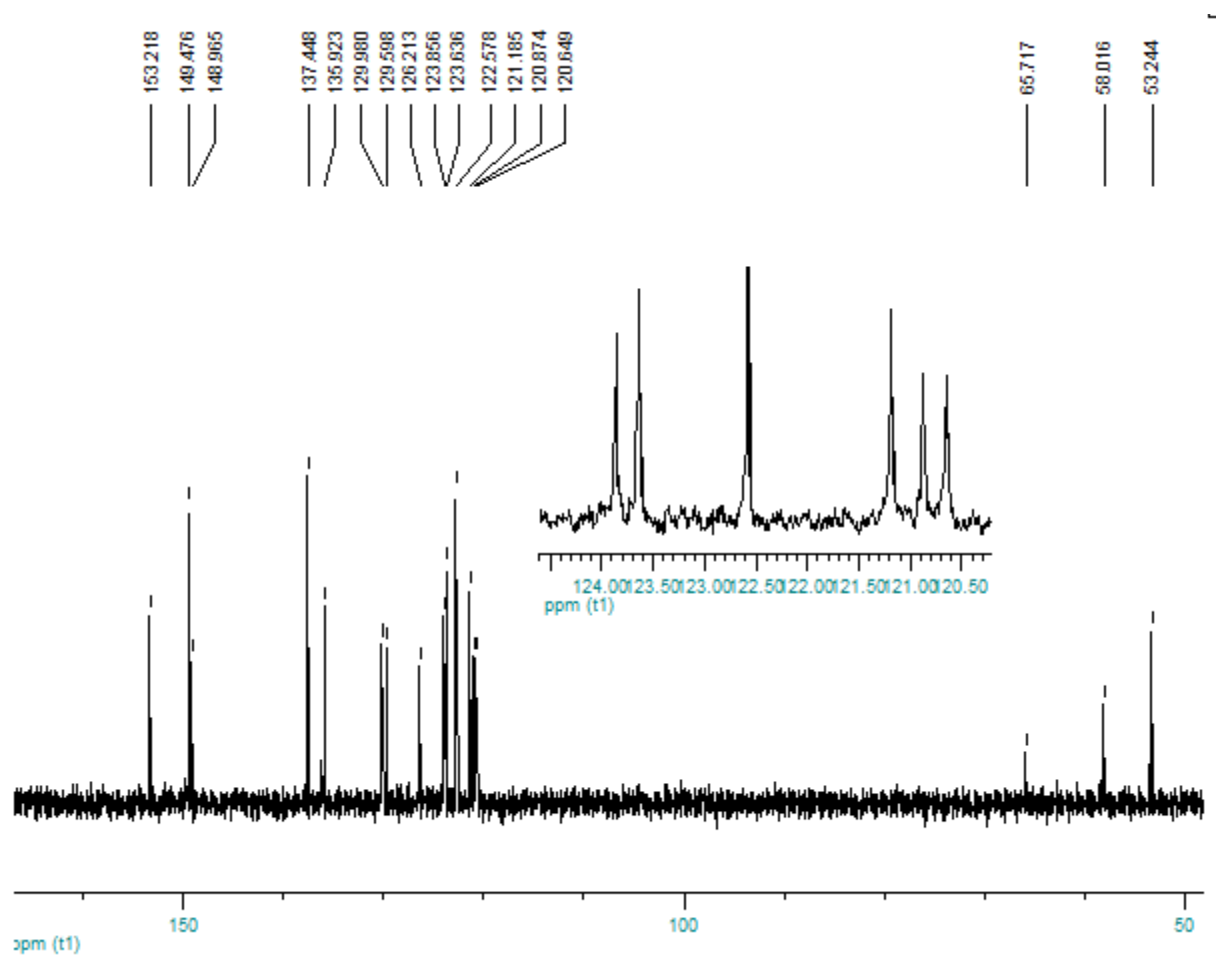

## Supporting Information

### 2D NMR Spectrums

Figure S13: HSQC of **3** (400 MHz, CDCl<sub>3</sub>, RT)

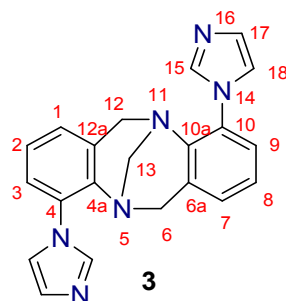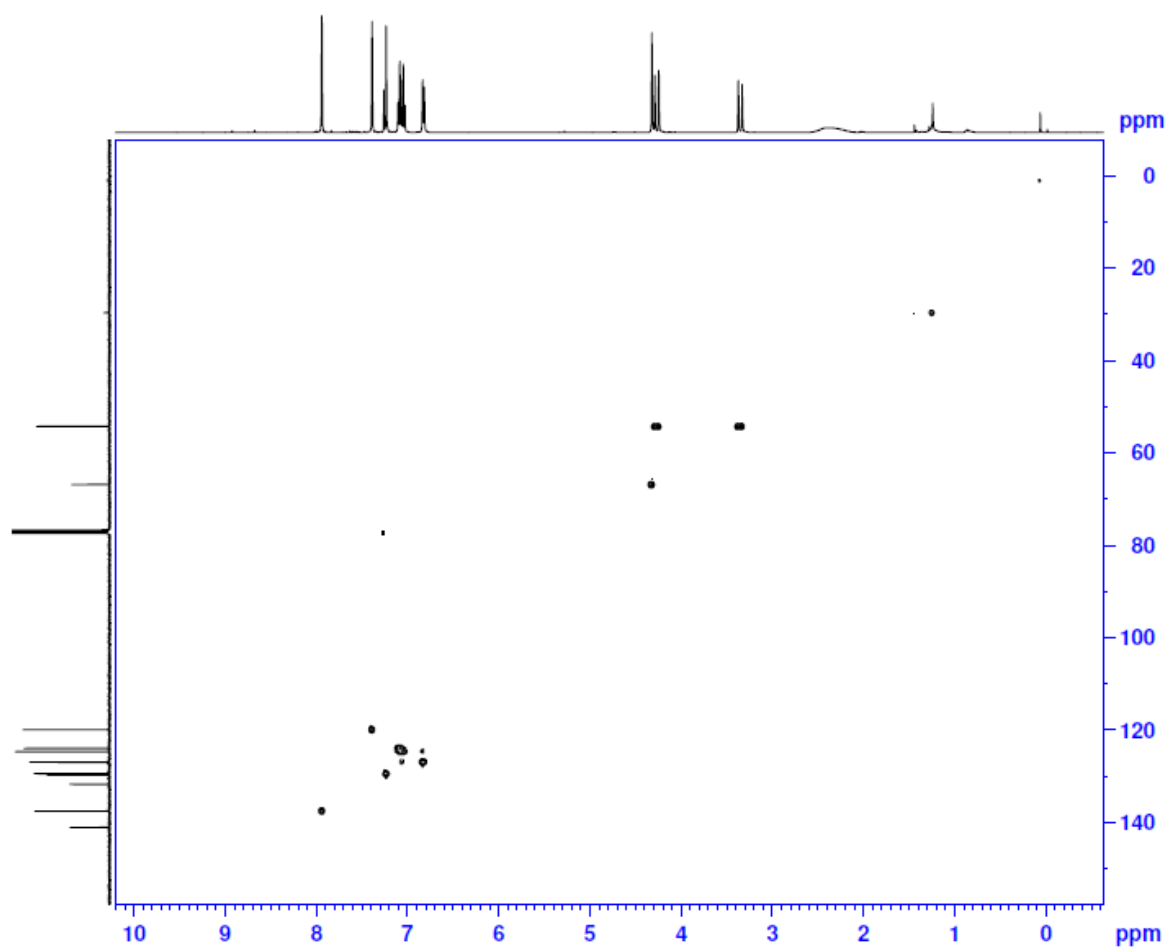

Figure S14: HSQC of 3 expansion

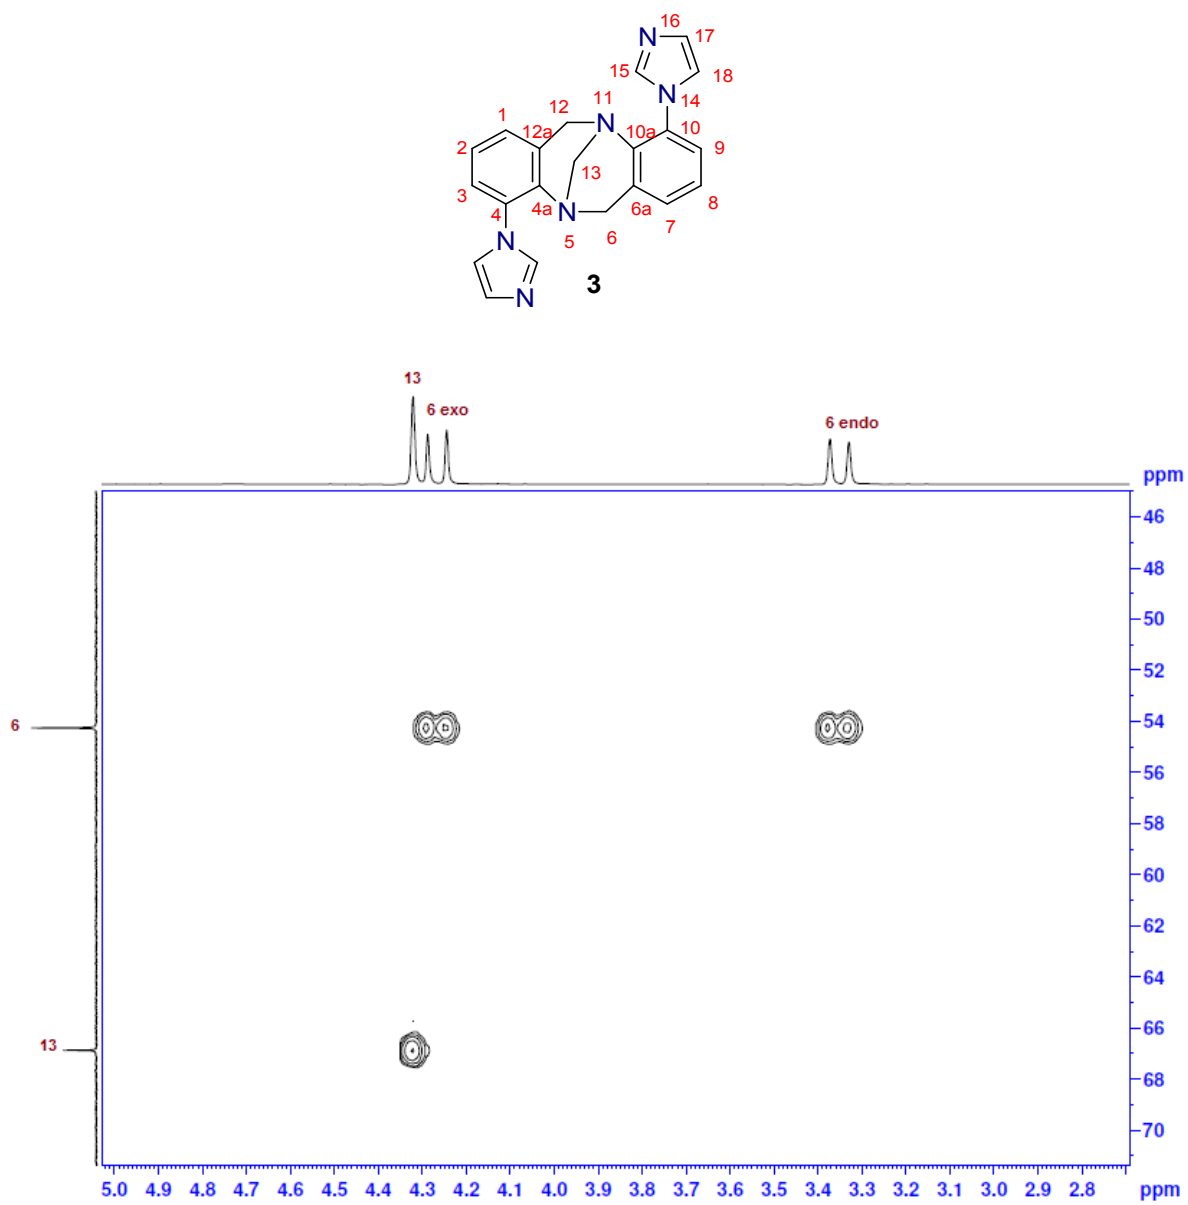

Supporting Information

Figure S15: HSQC of 3 expansion

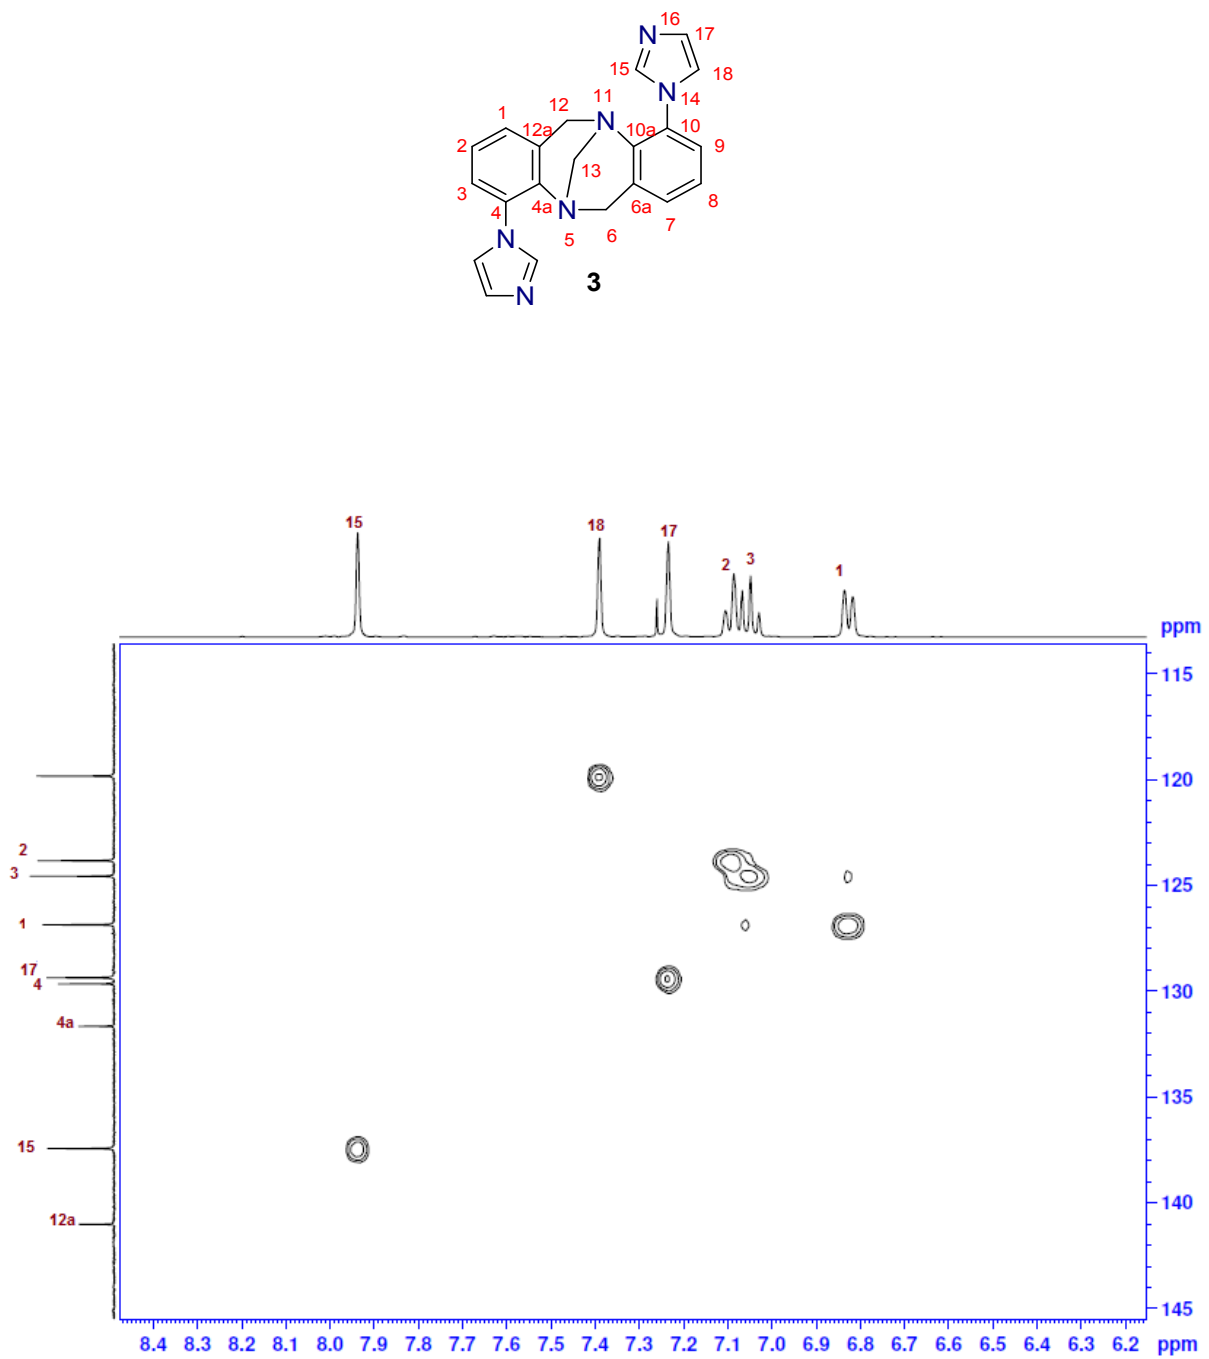

Supporting Information

Figure S16: HMBC of **3** (400 MHz, CDCl<sub>3</sub>, RT)

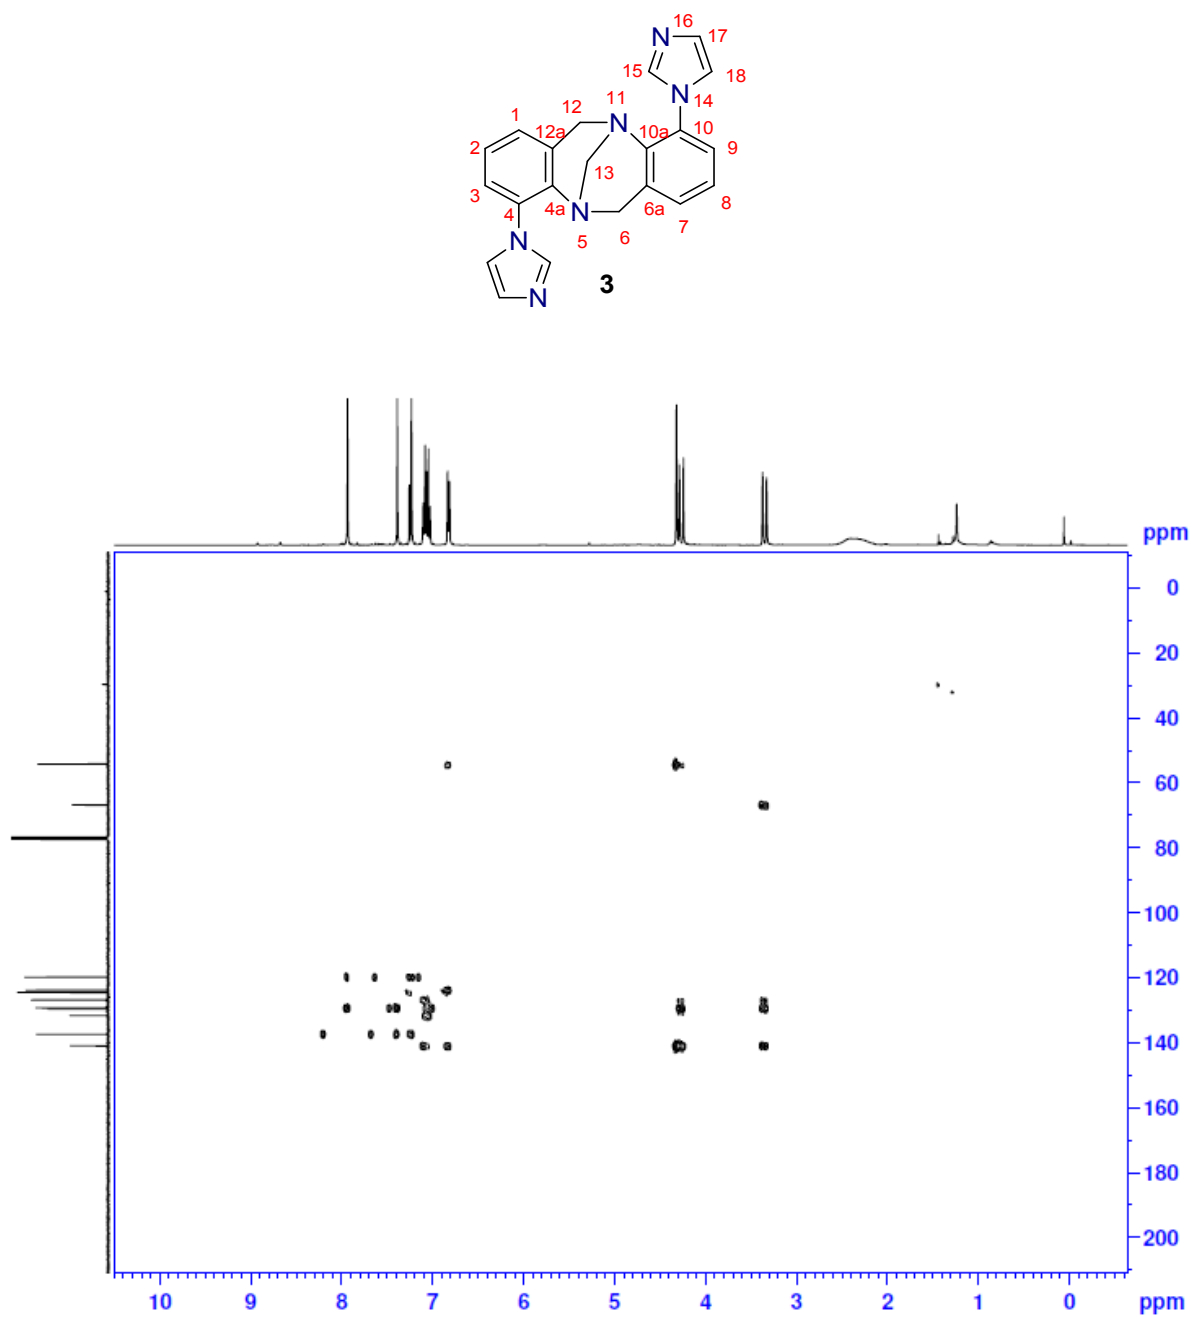



Supporting Information

Figure S17: HMBC of **3** expansions

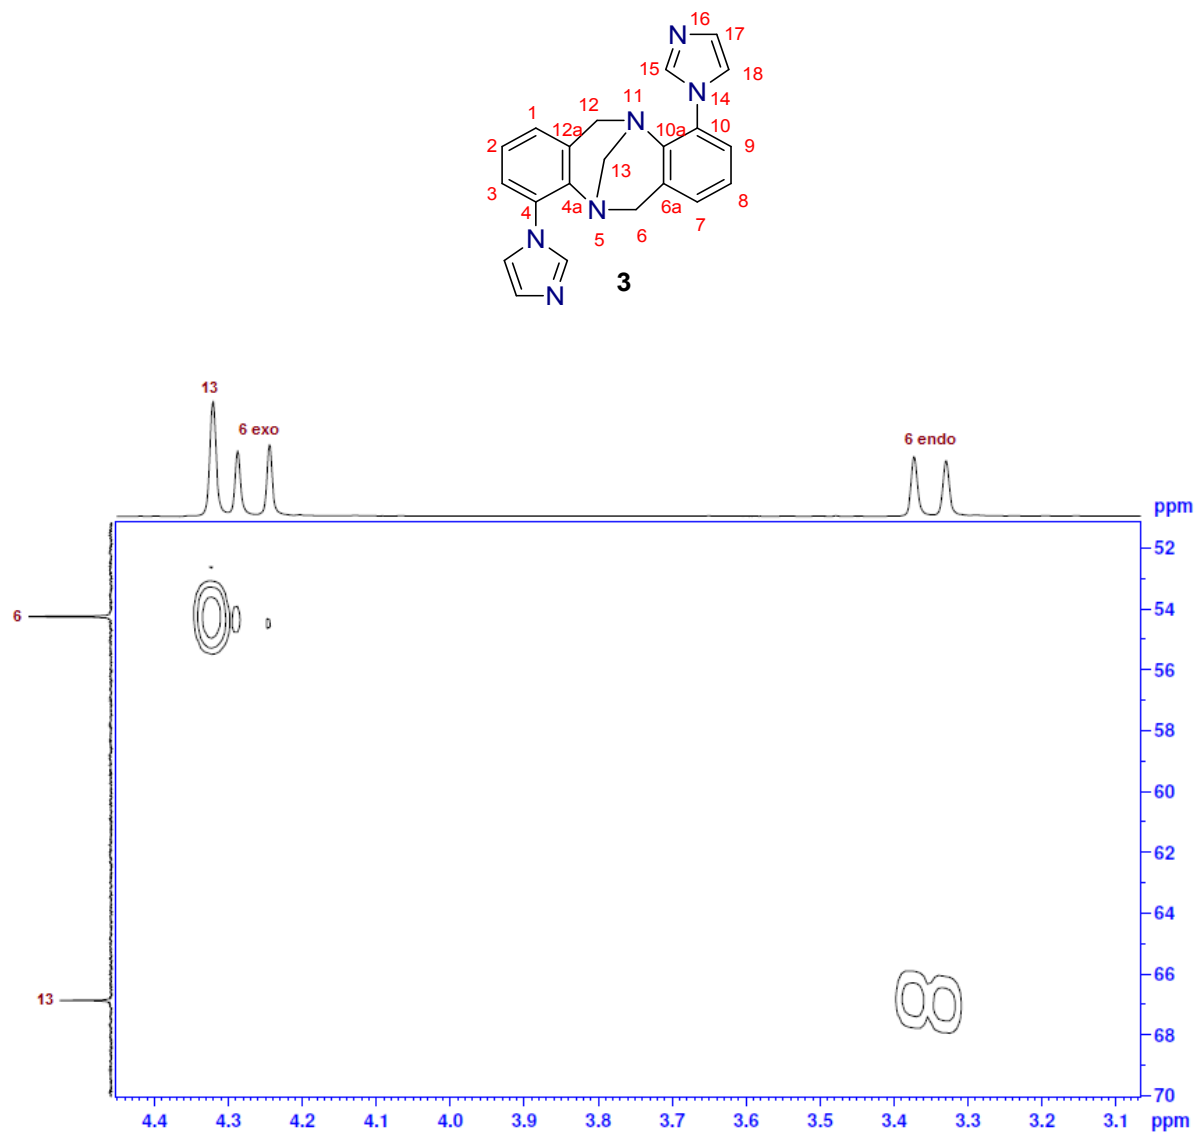

Supporting Information

Figure S18: HMBC of **3** expansions

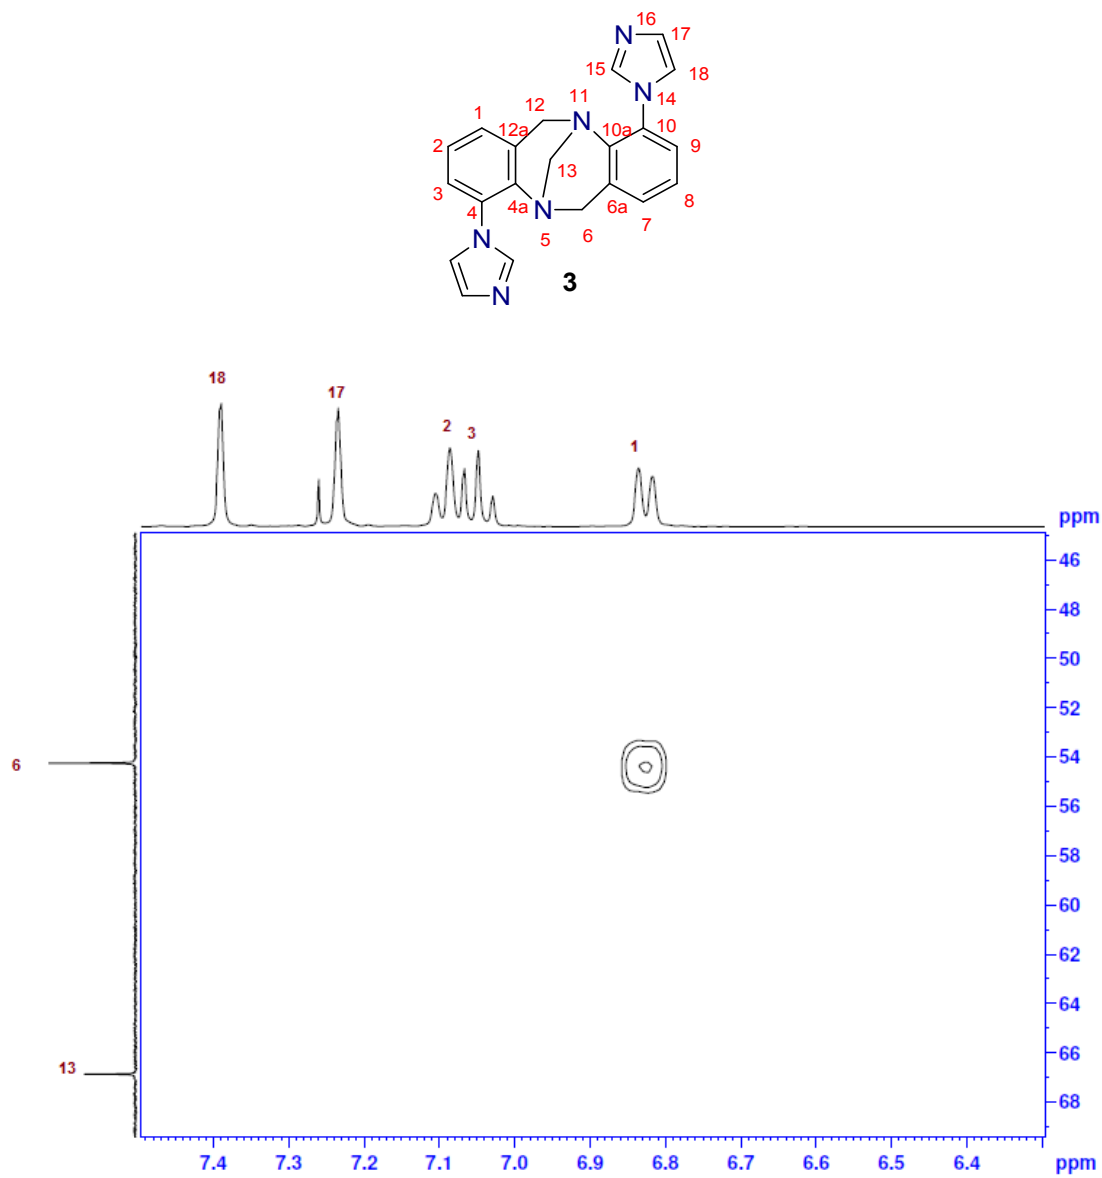

Supporting Information

Figure S19: HMBC of 3 expansions

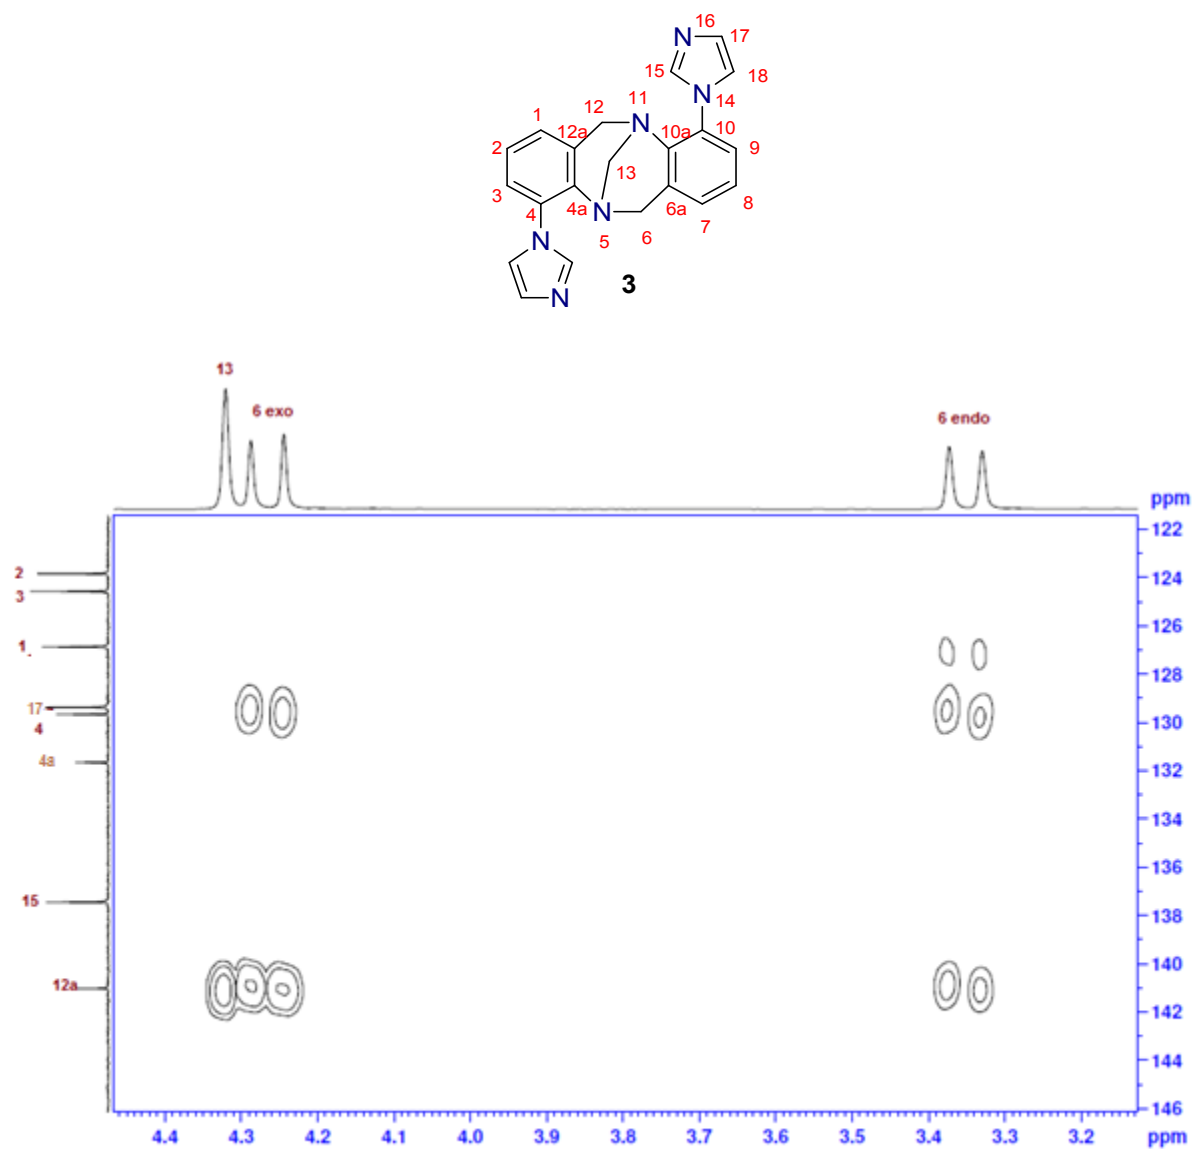

Supporting Information

Figure S20: HMBC of 3 expansion

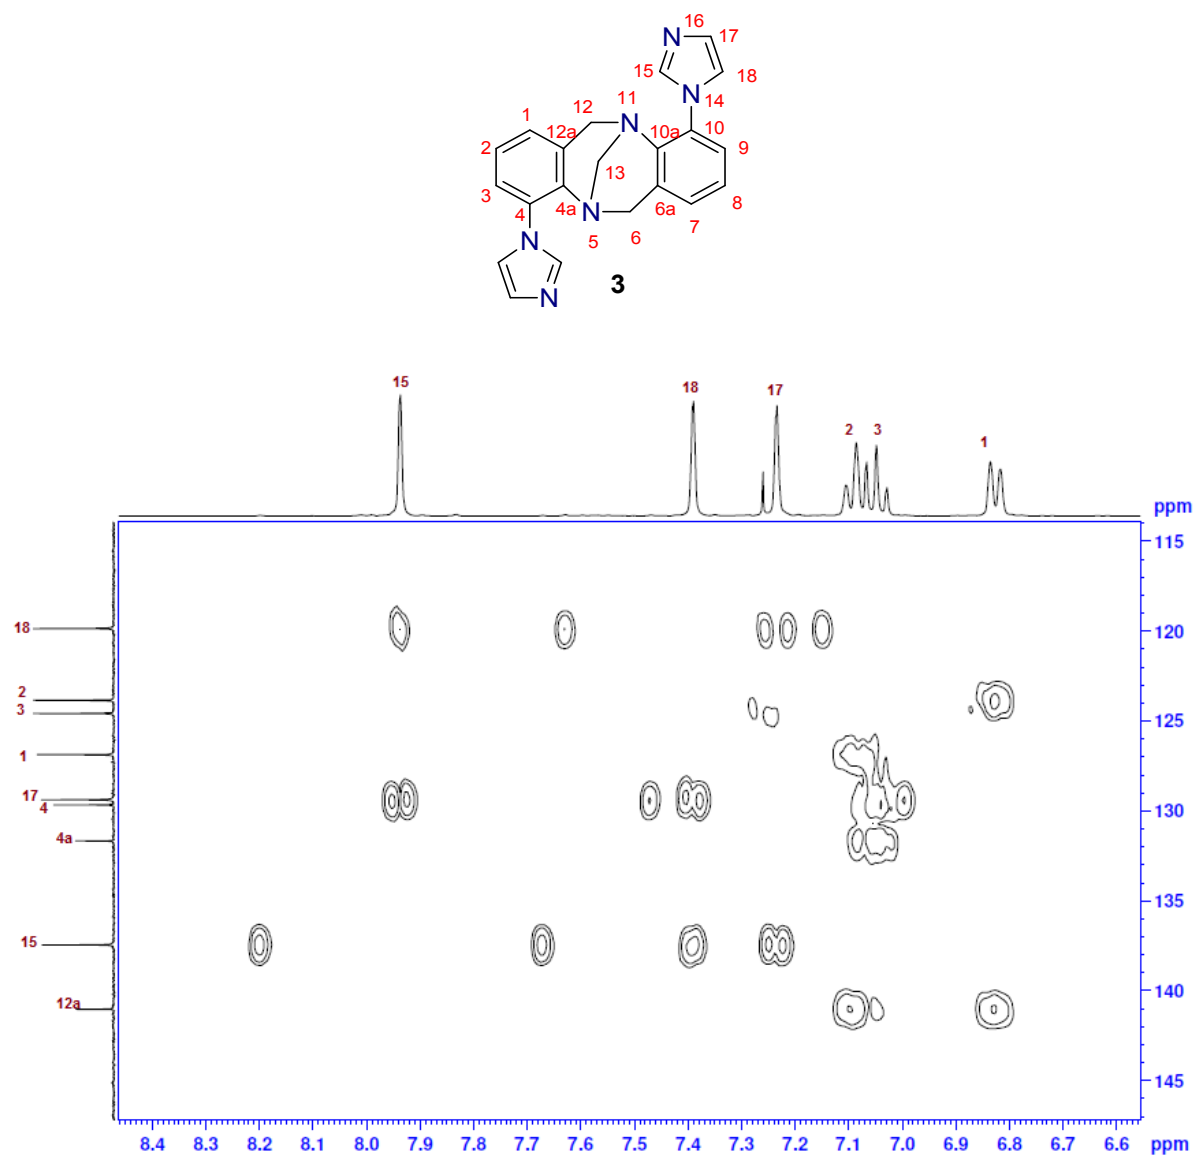

Supporting Information

Figure S21: HSQC of **5** (400 MHz, DMSO-*d*<sub>6</sub>, RT)

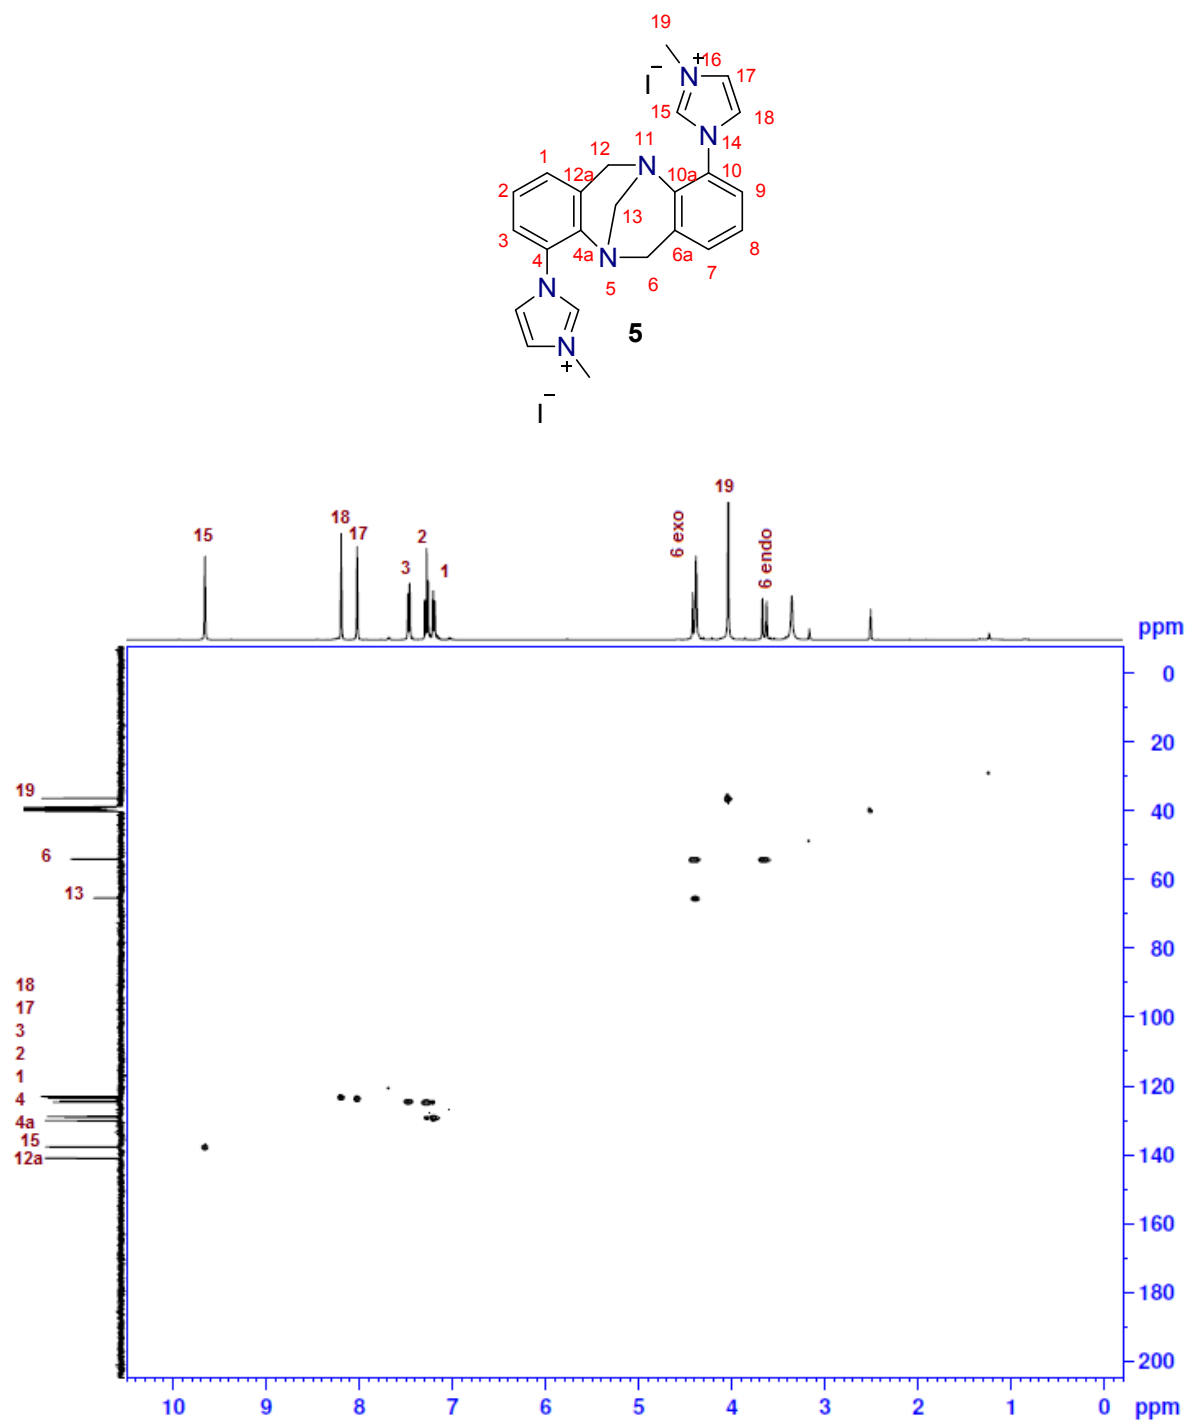

Figure S22: HSQC of 5 expansion

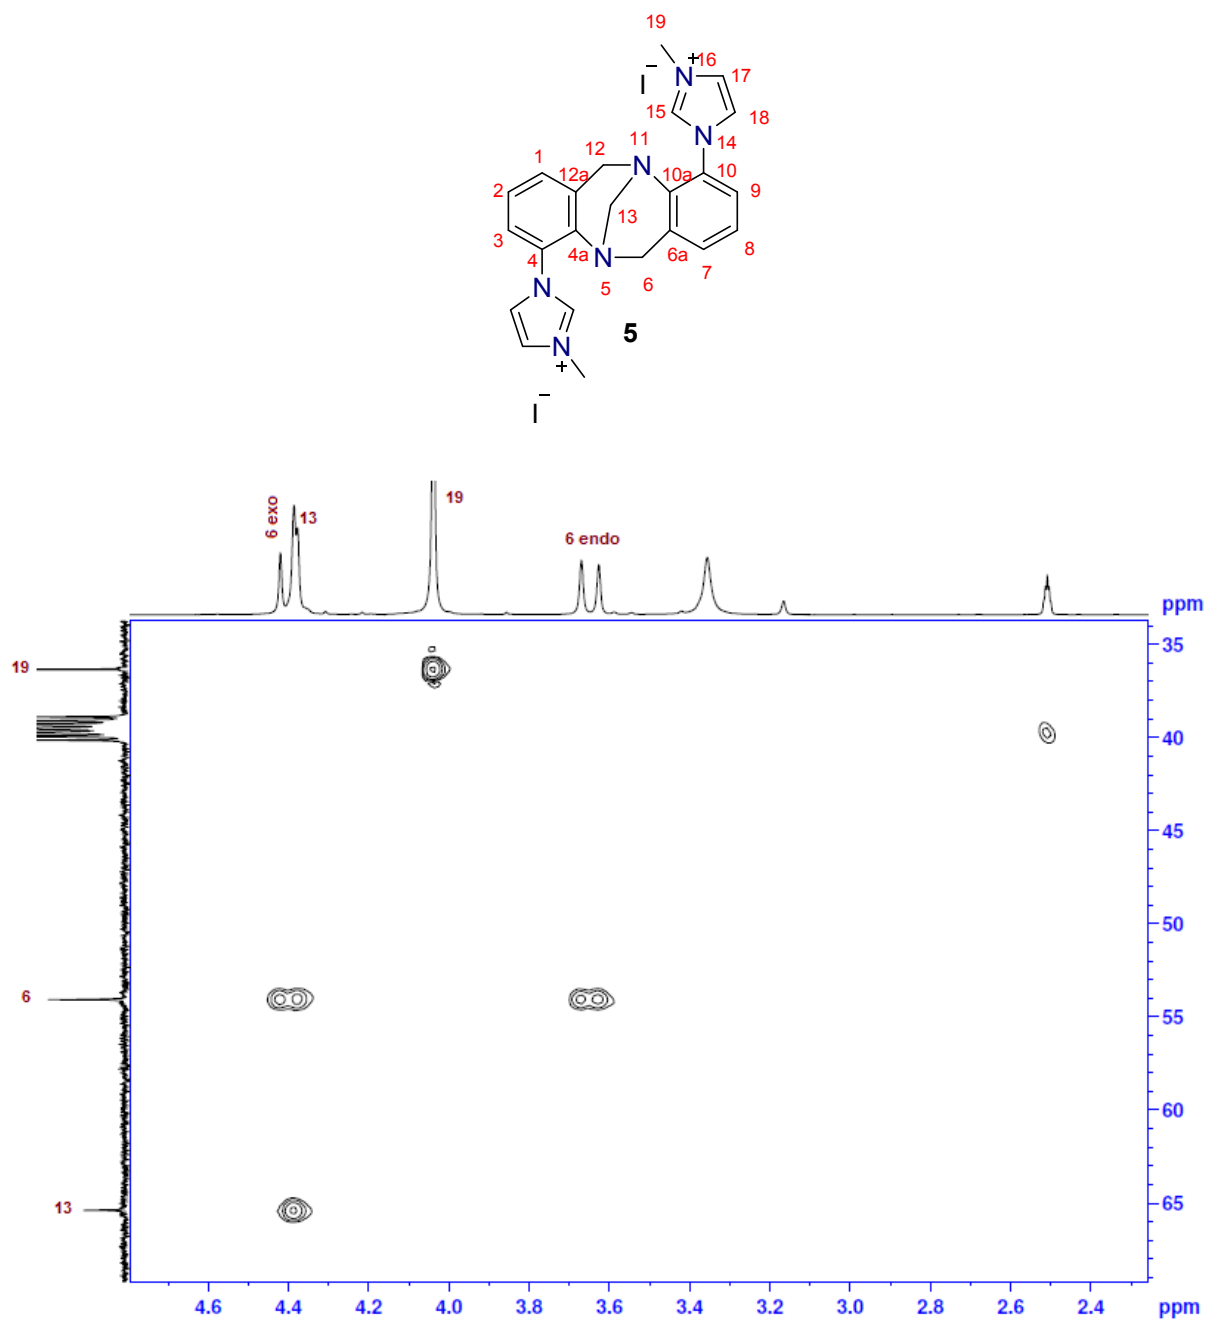

Figure S23: HSQC of 5 expansion

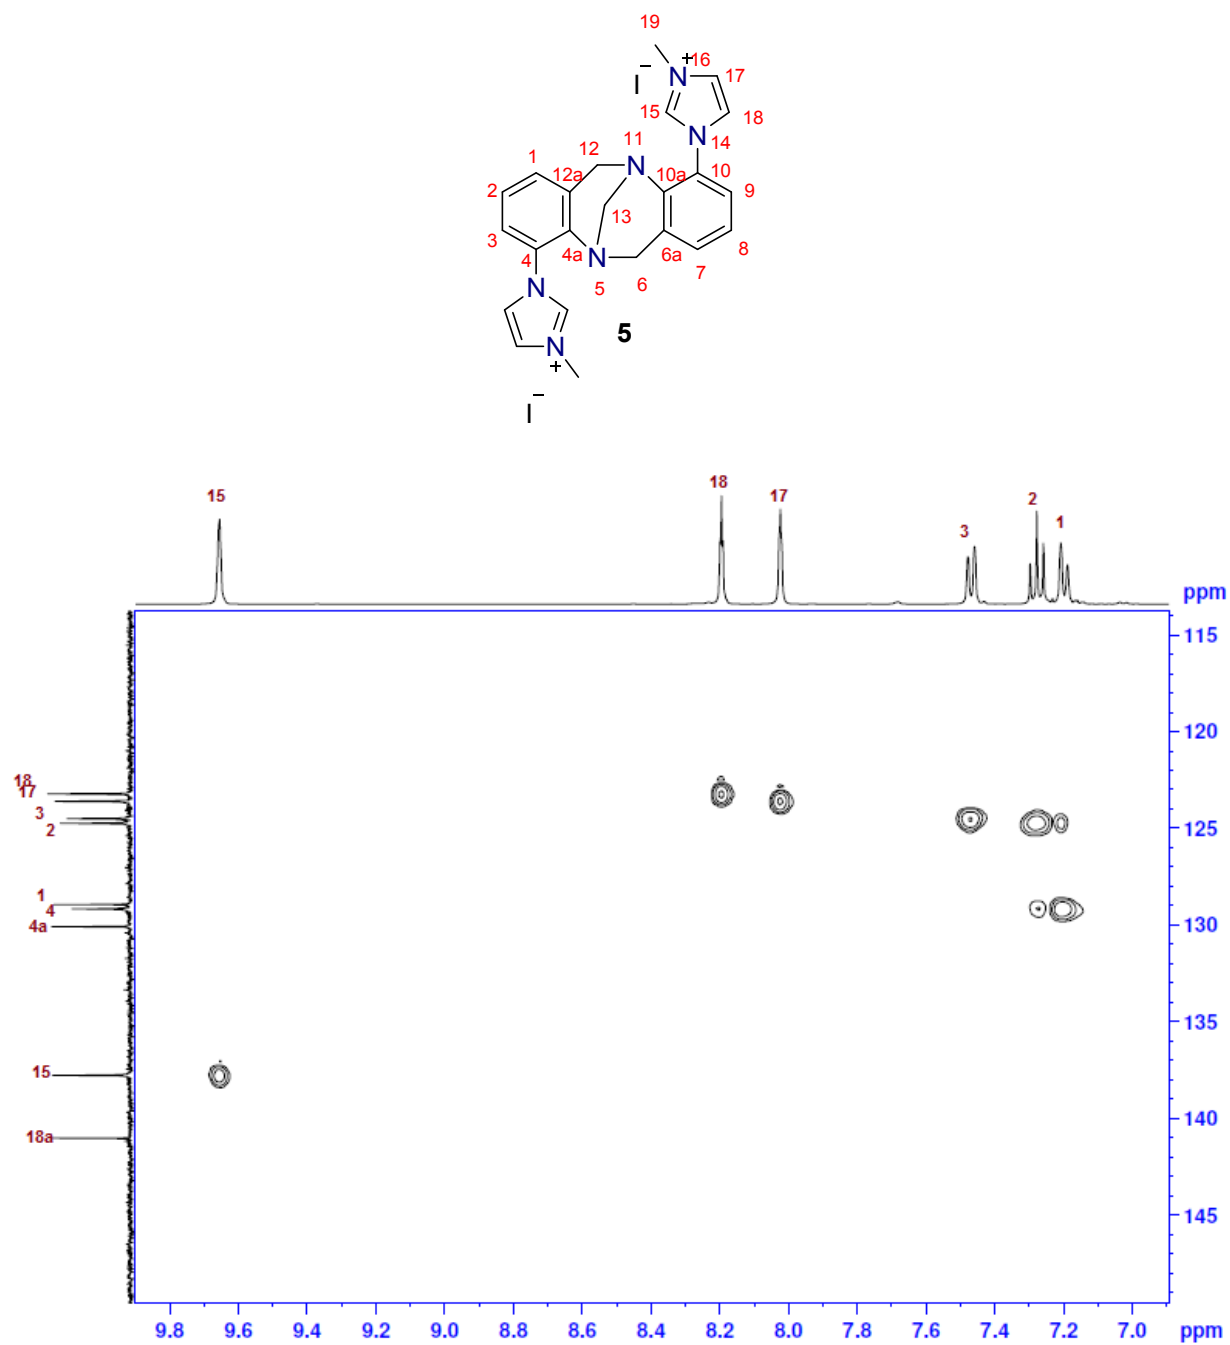

Figure S24: HMBC of **5** (400 MHz, DMSO-*d*<sub>6</sub>, RT)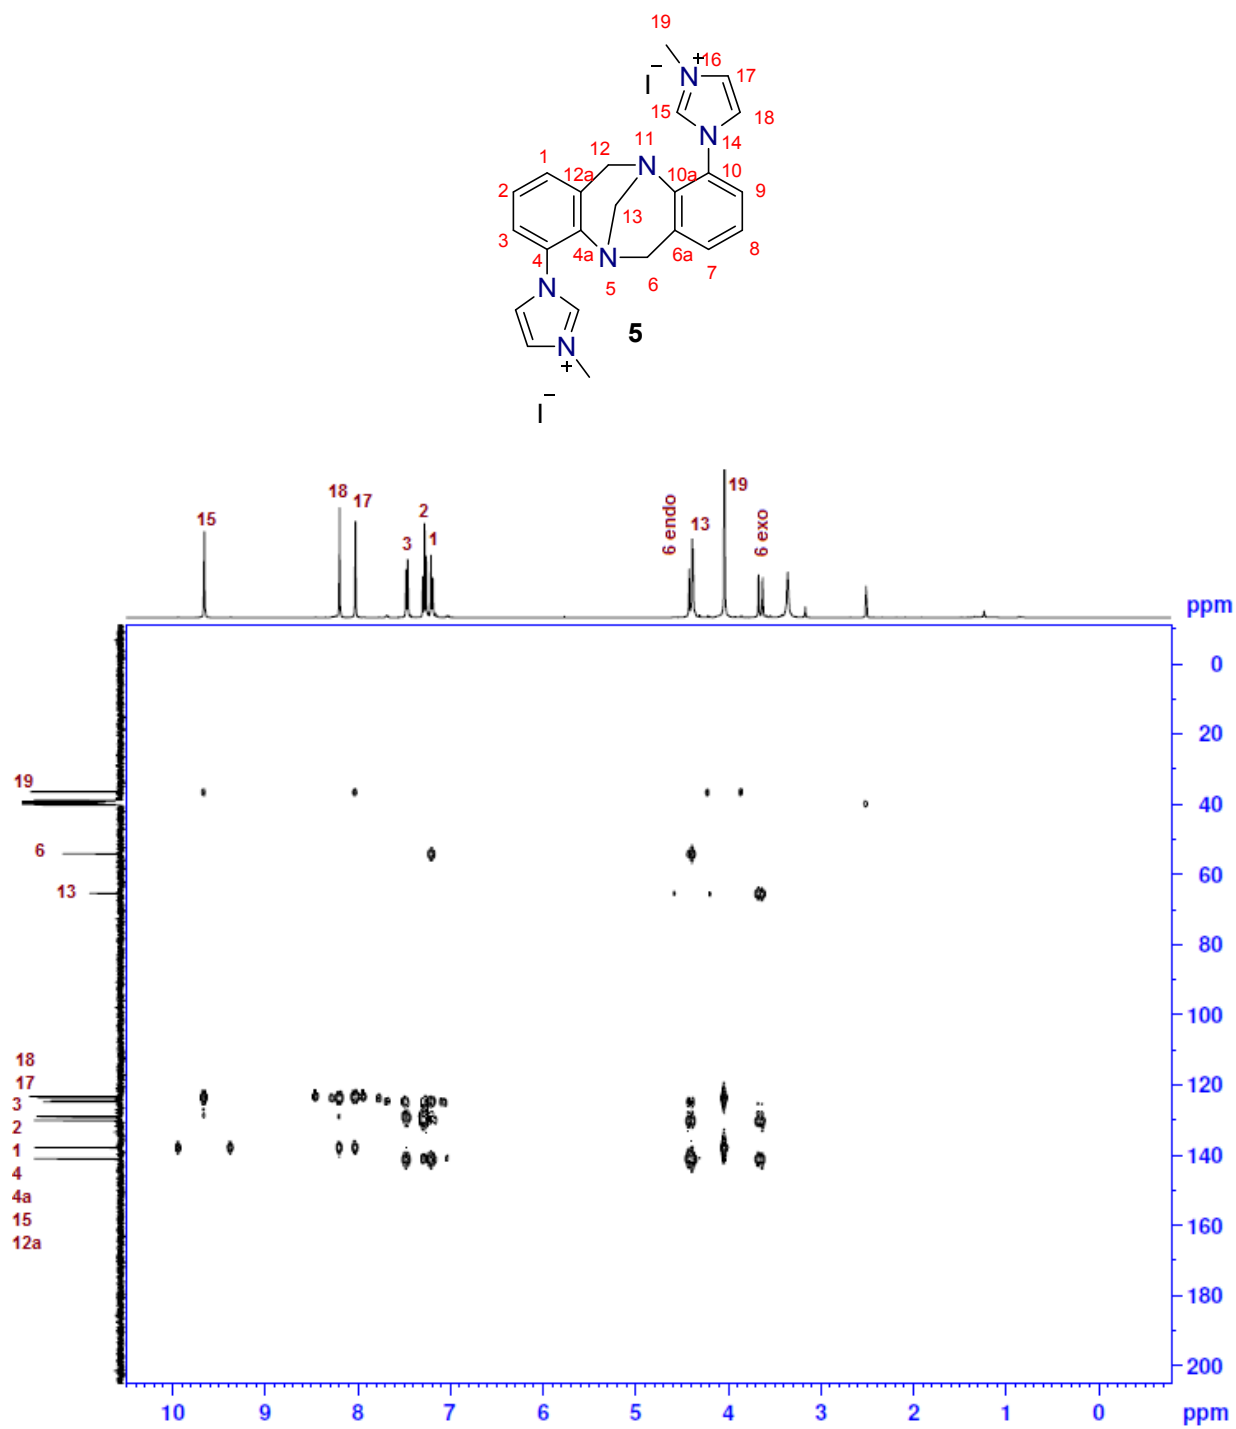



Figure S25: HMBC of 5 expansion

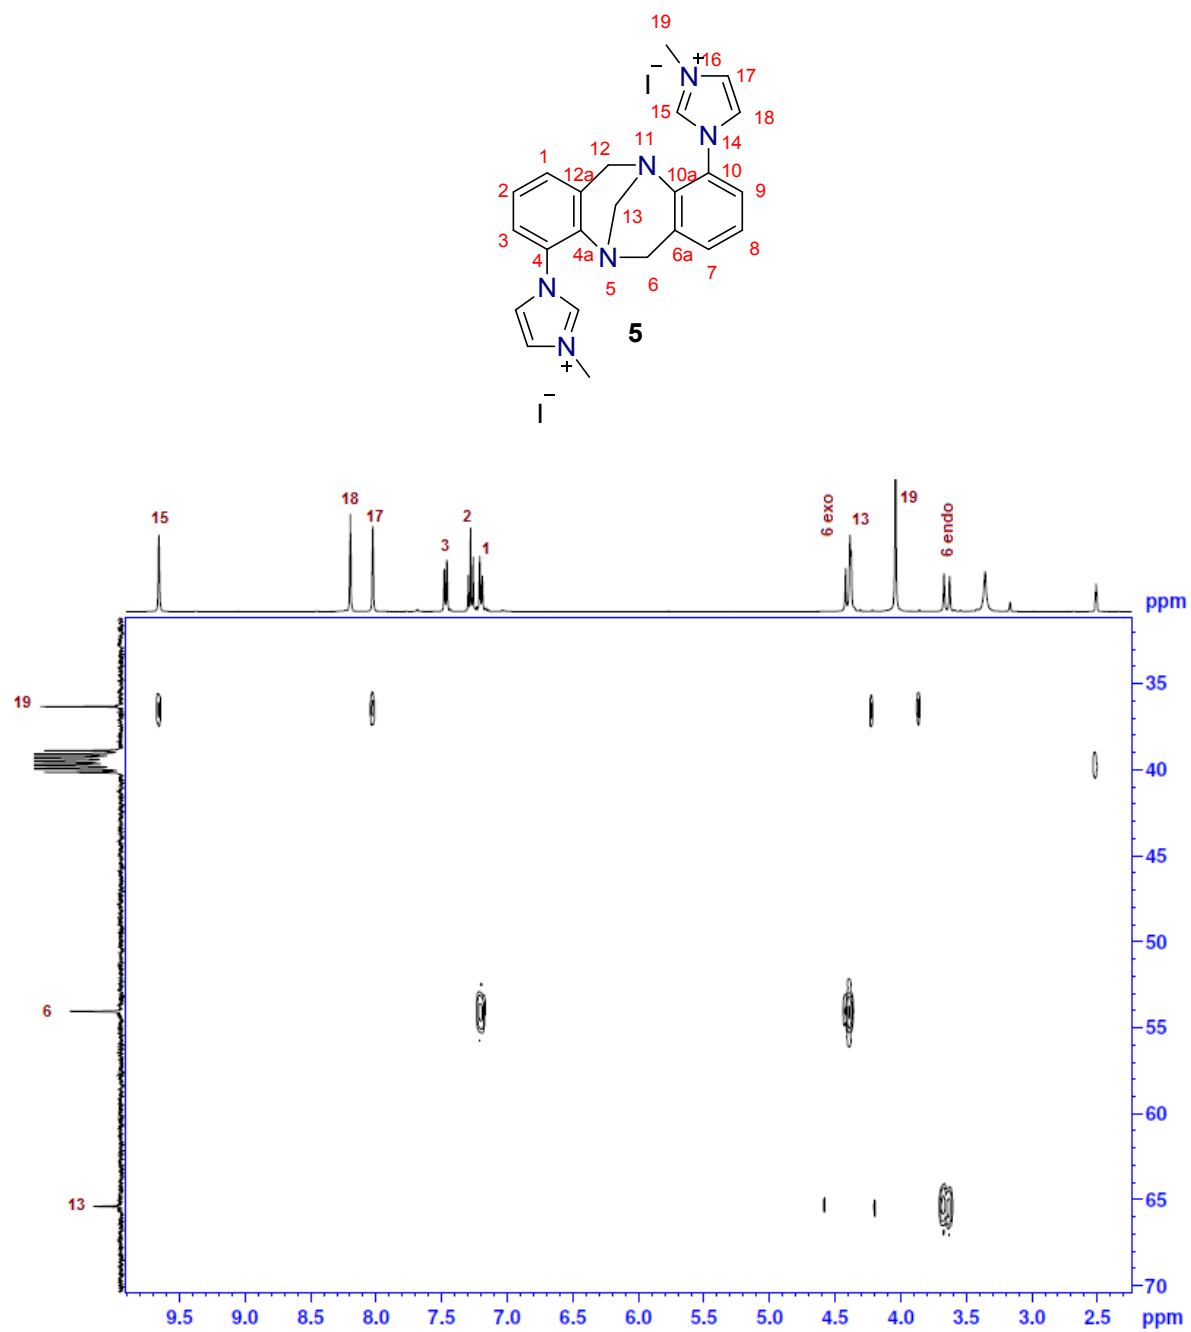

Figure S26: HMBC of 5 expansion

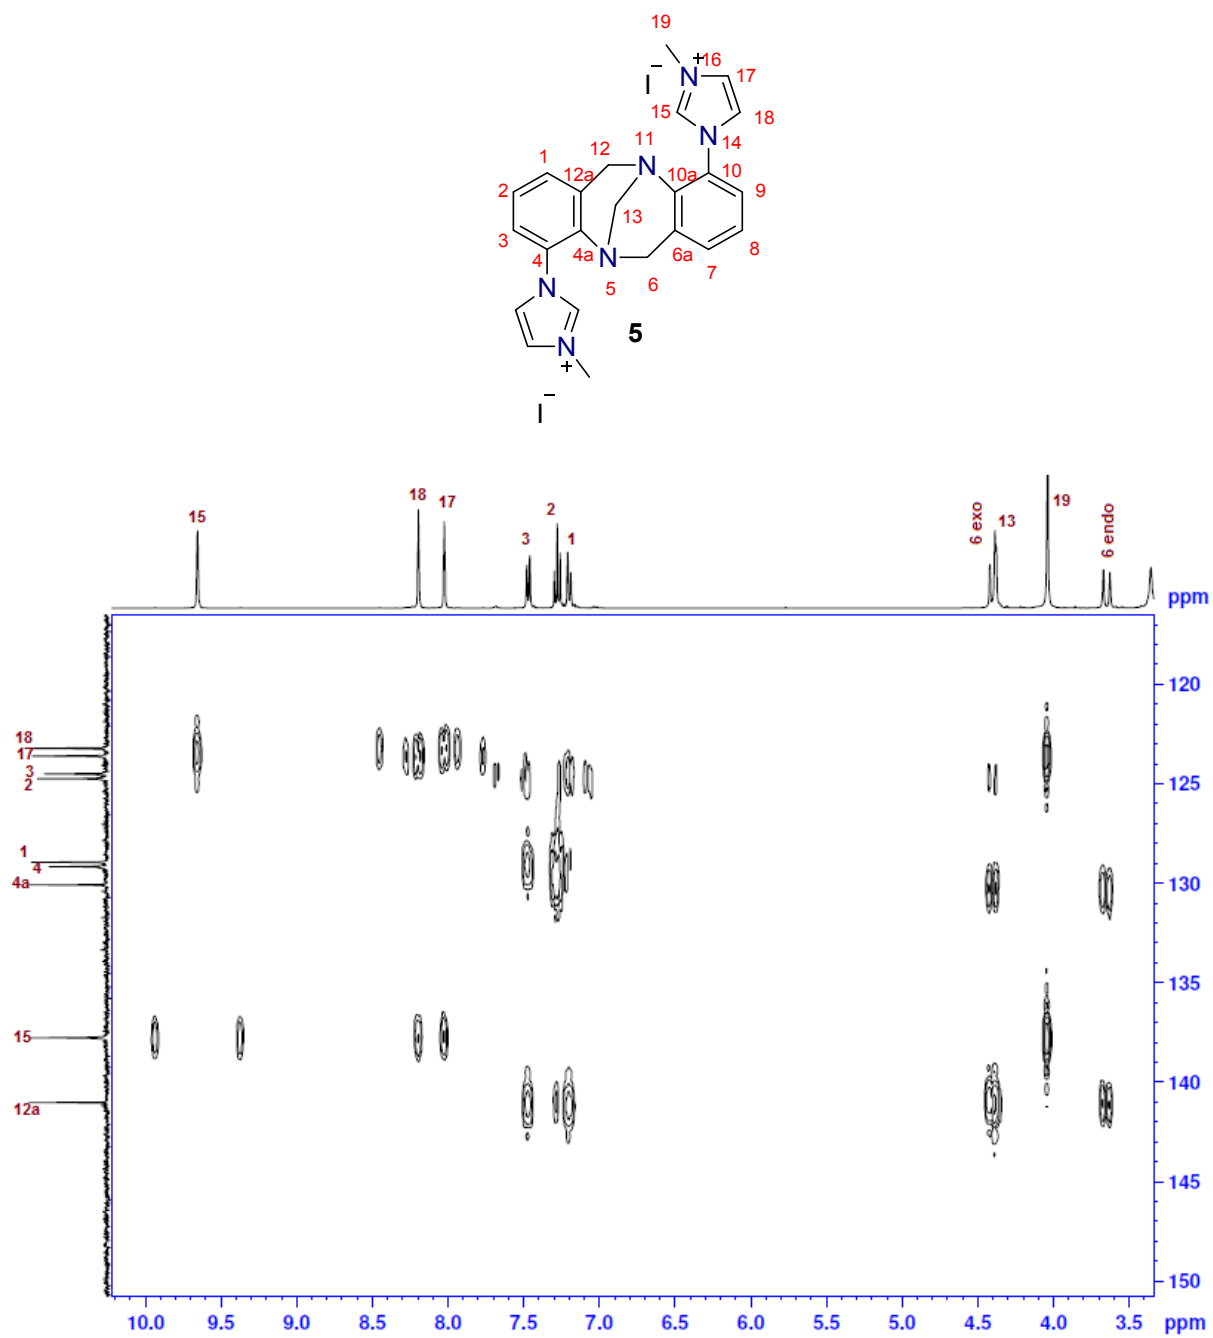

Figure S27: HMBC of 5 expansion

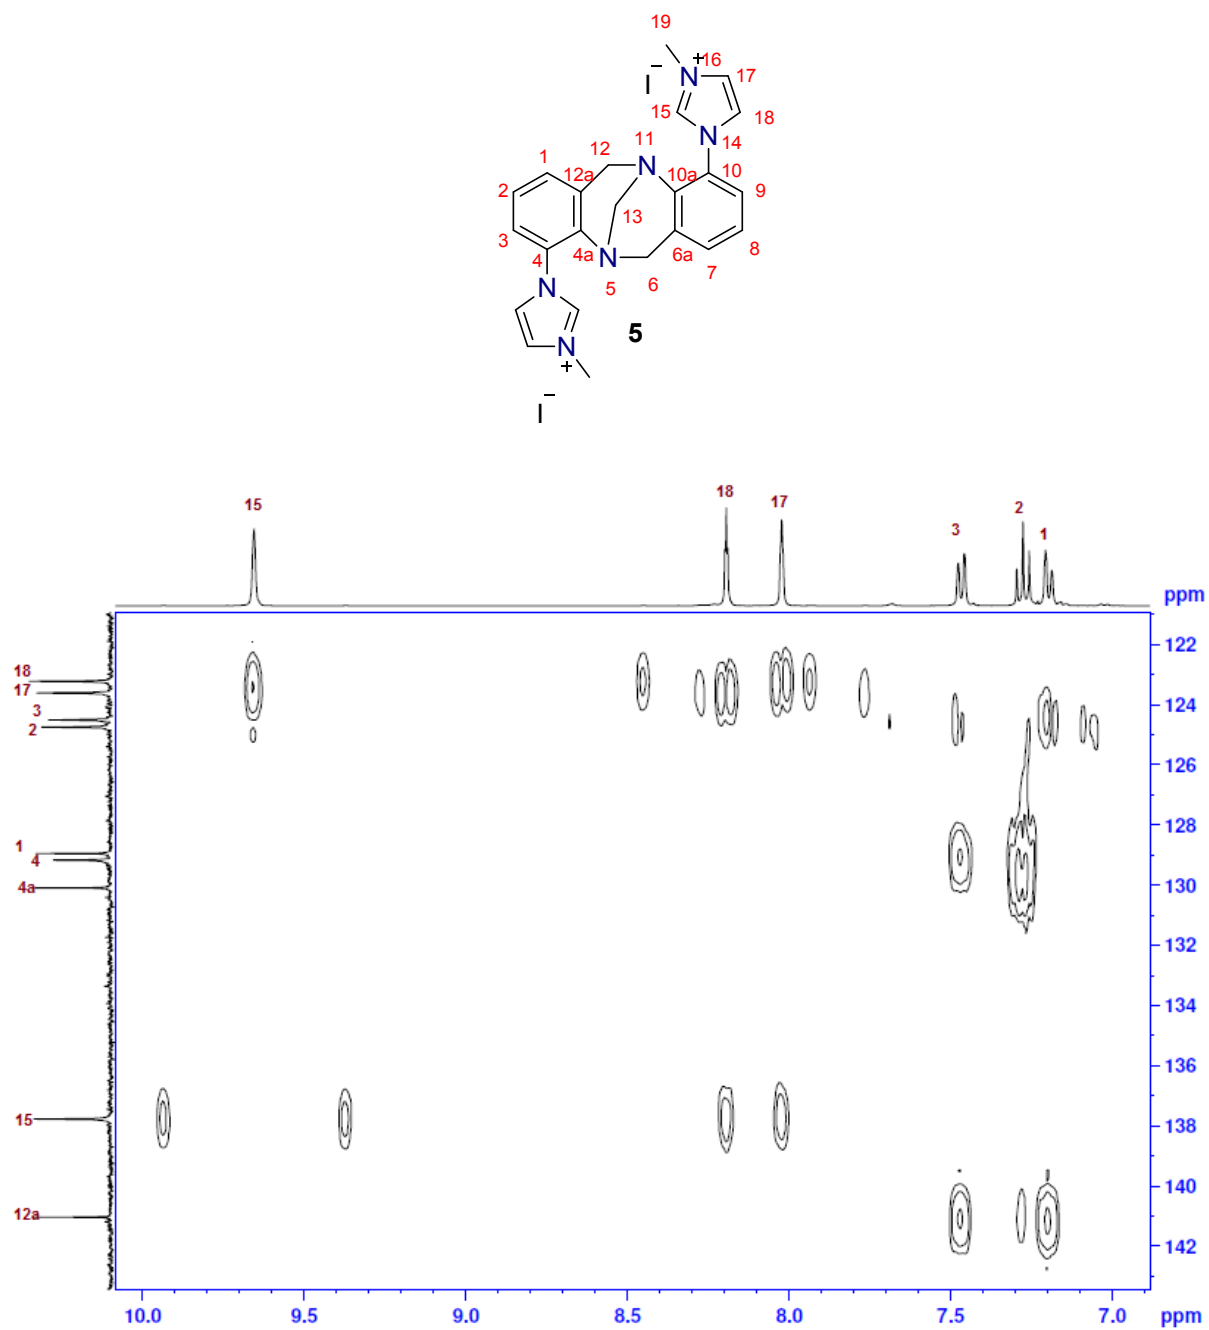

Figure S28: HMBC of 5 expansion

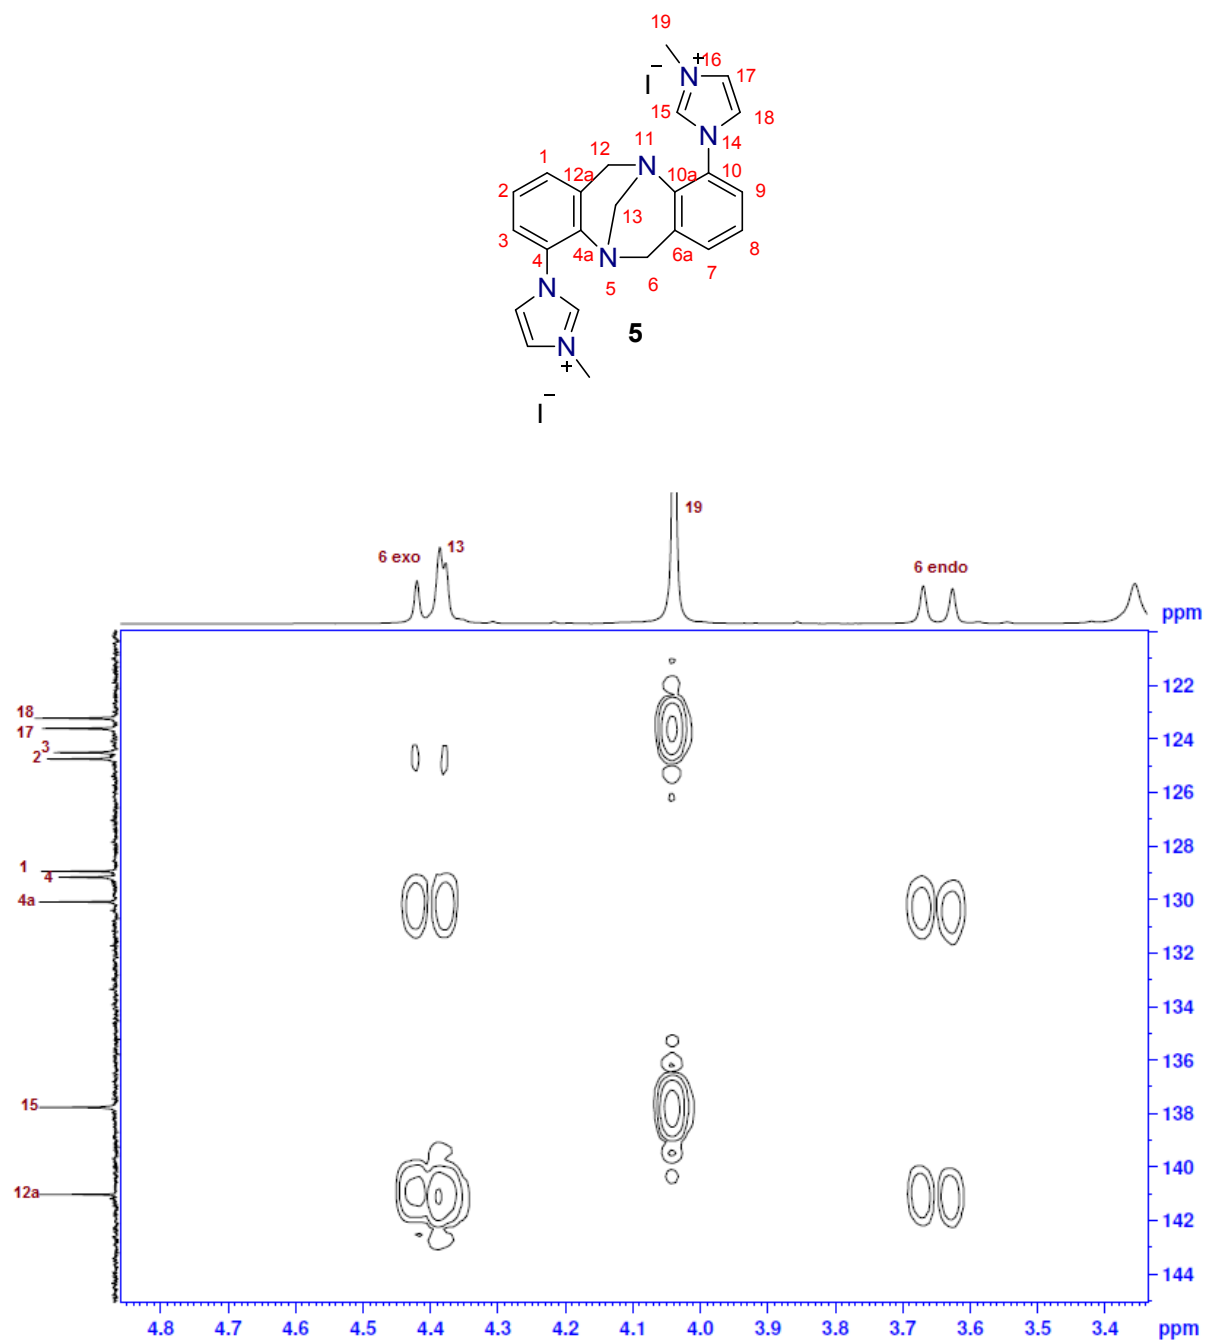Figure S29: HSQC of 6 (400 MHz, DMSO- $d_6$ , RT)

# Supporting Information

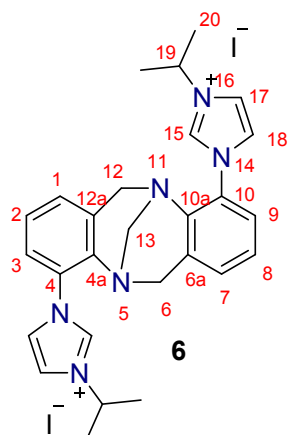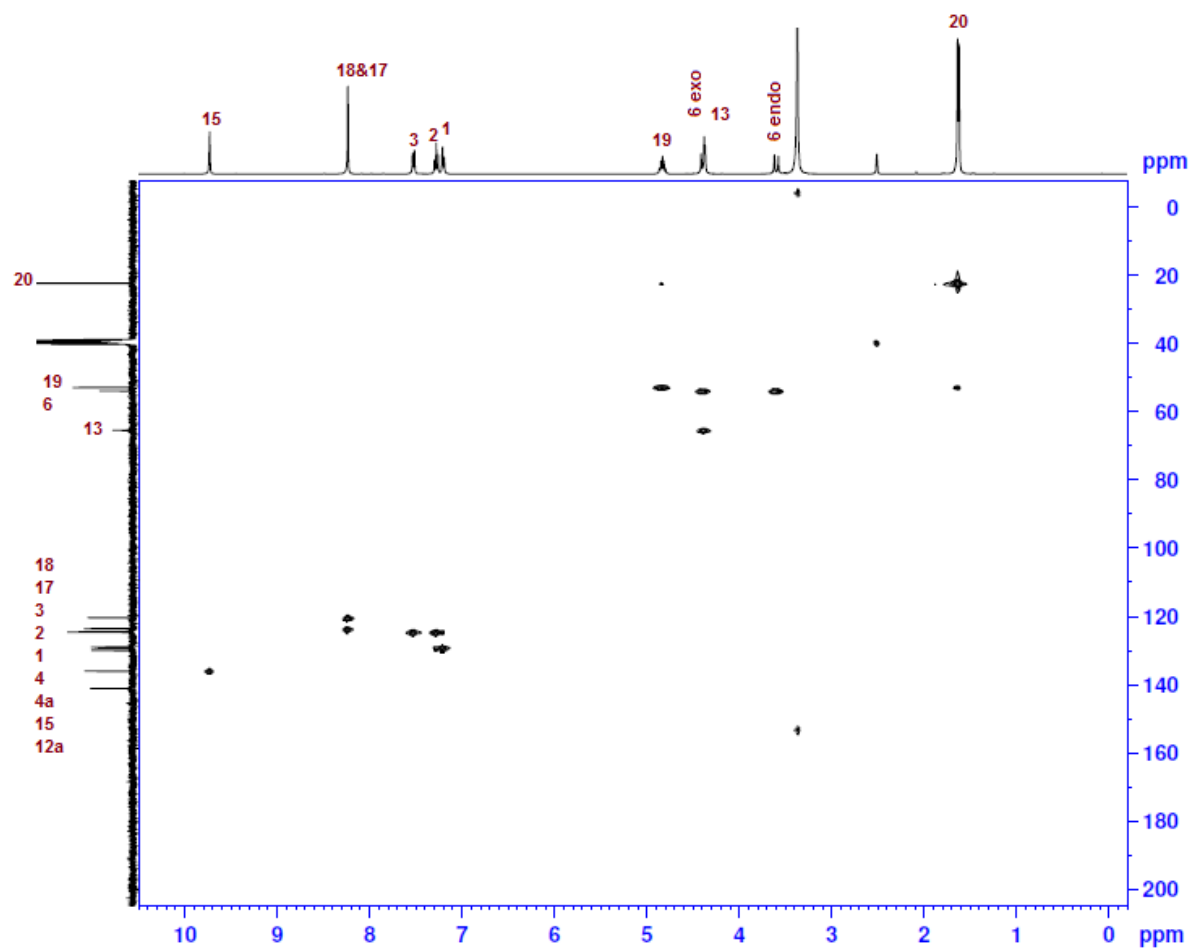

Supporting Information

Figure S30: HSQC of 6 expansion

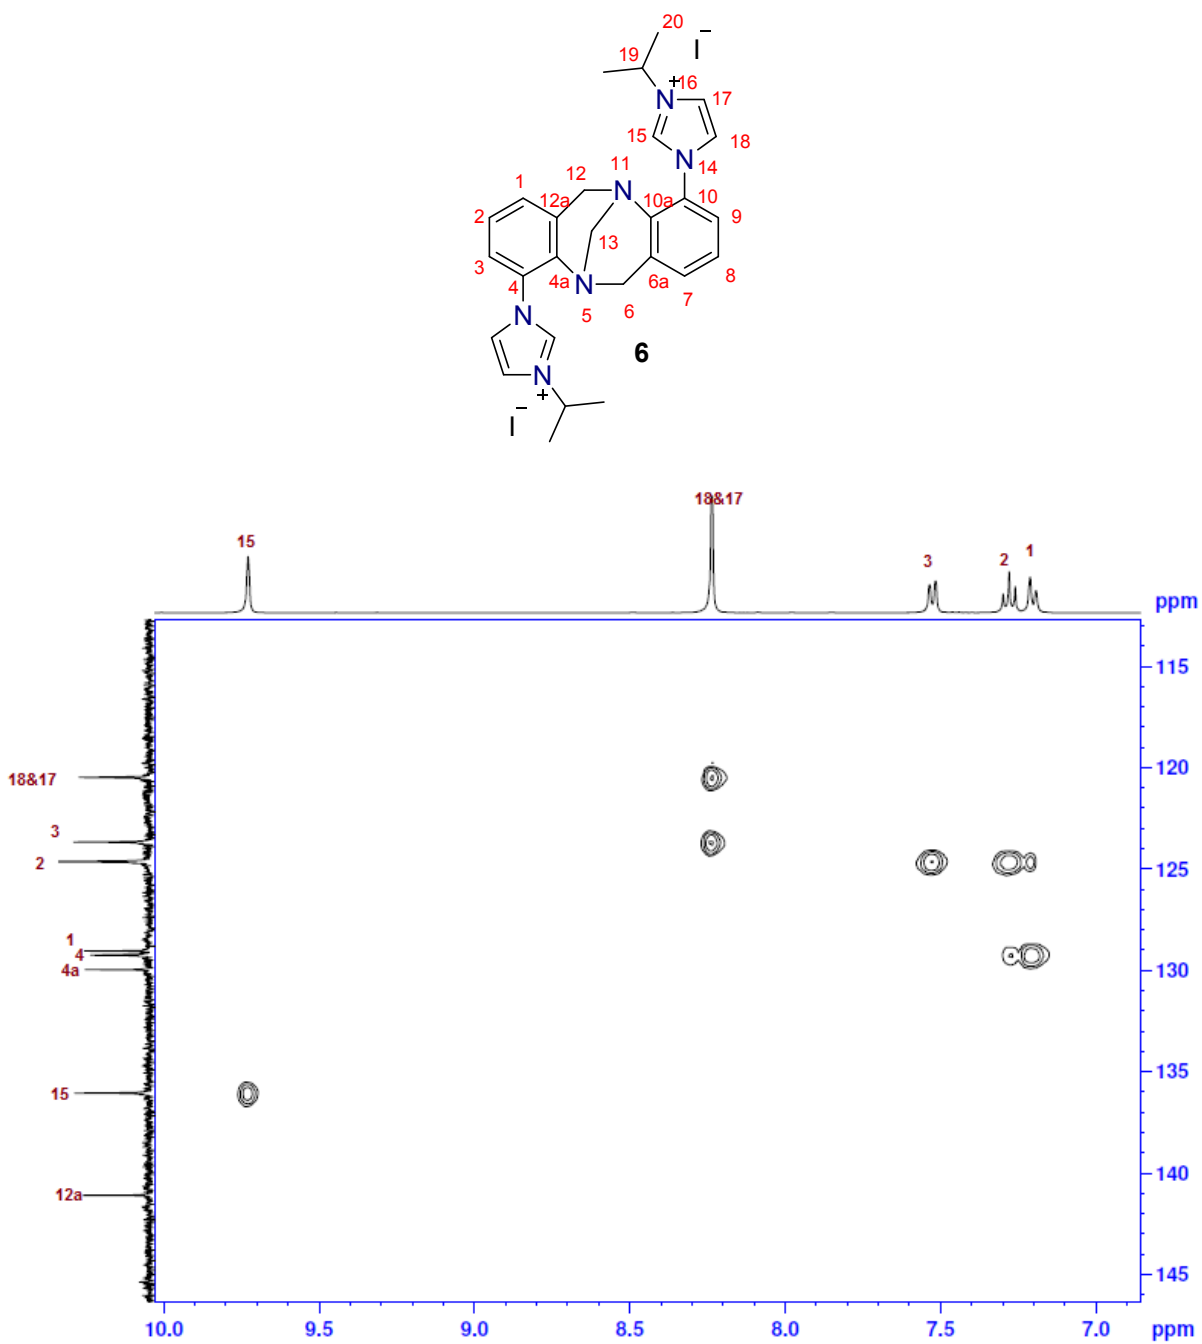

Figure S31: HSQC of 6 expansion

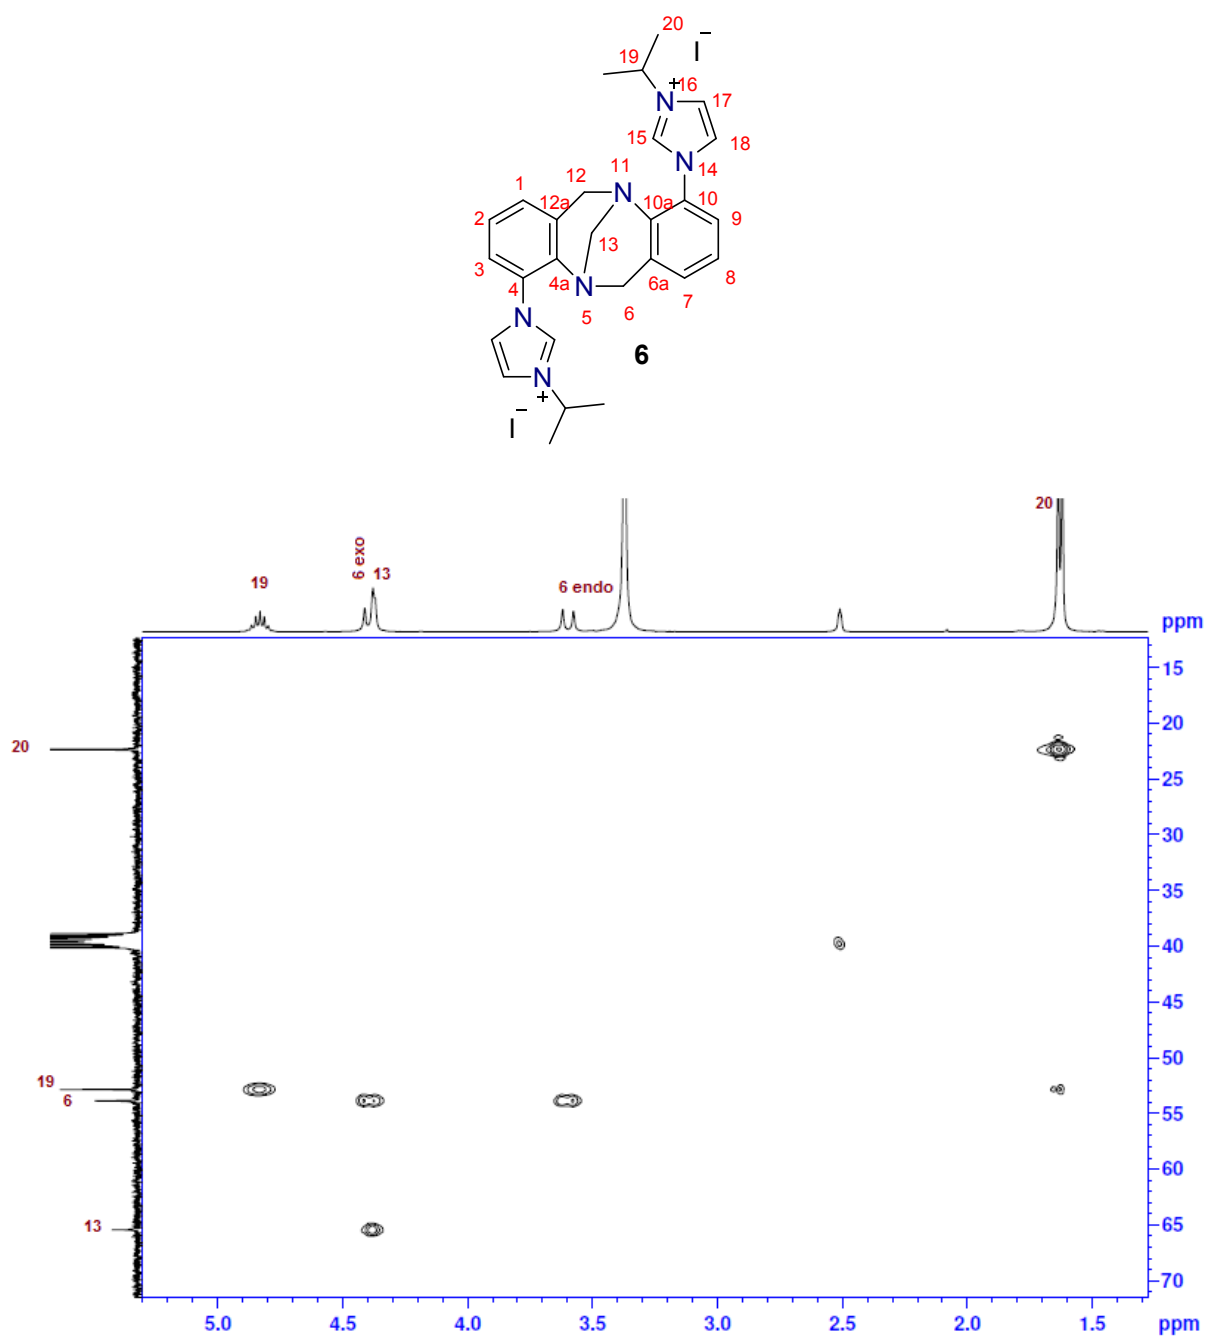Figure S32: HMBC of 6 (400 MHz, DMSO-*d*<sub>6</sub>, RT)

### Supporting Information

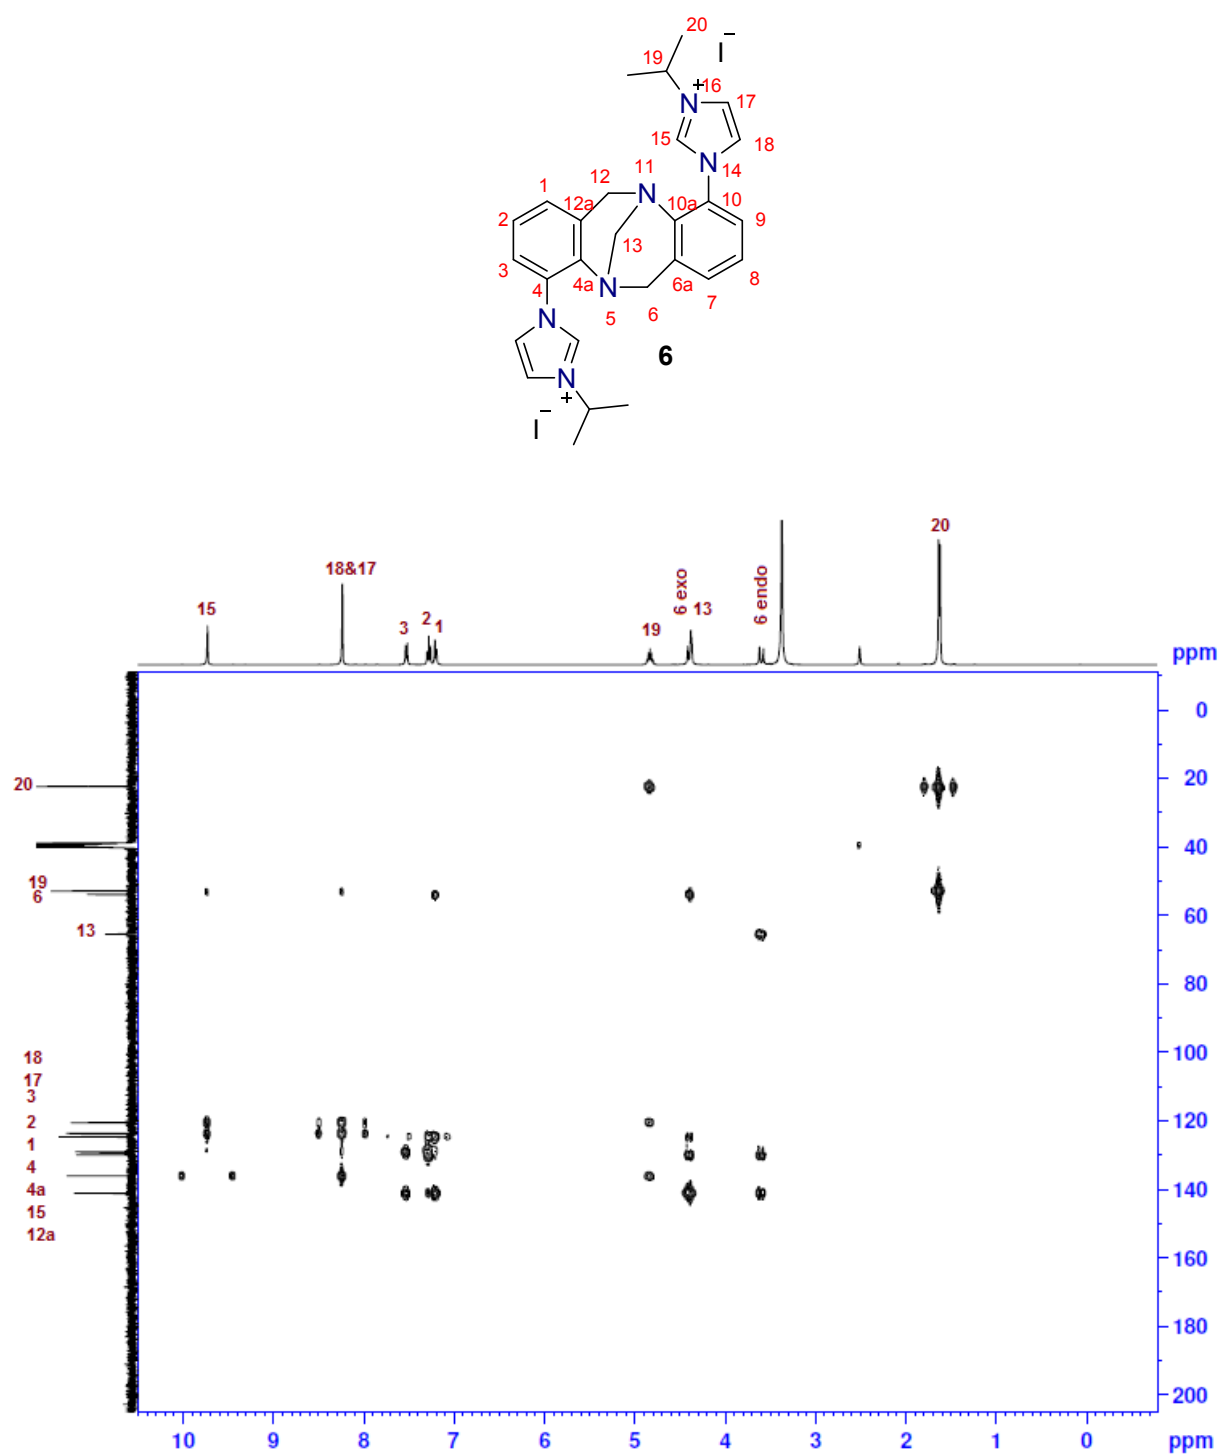

Figure S33: HMBC of **6** expansion



Supporting Information

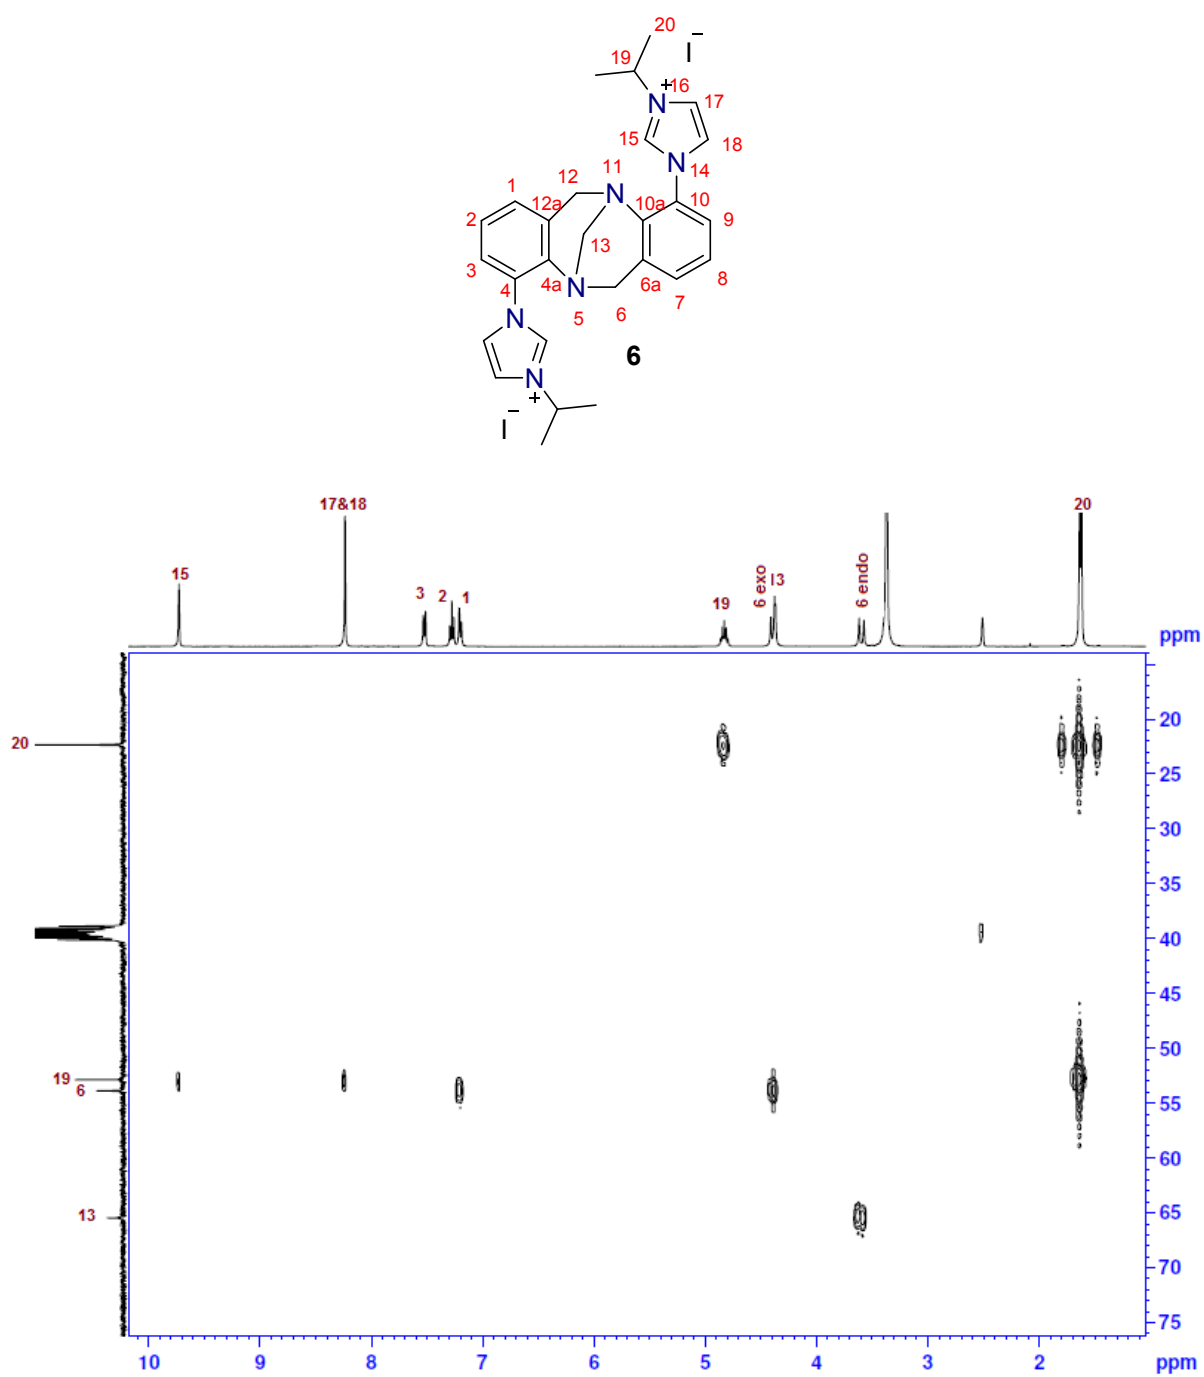

Figure S34: HMBC of 6 expansion

Supporting Information

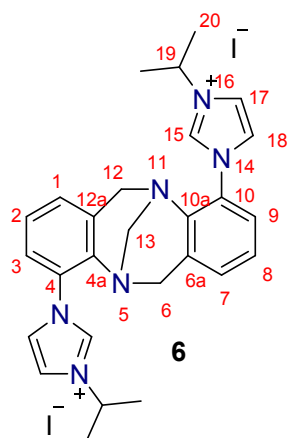

h

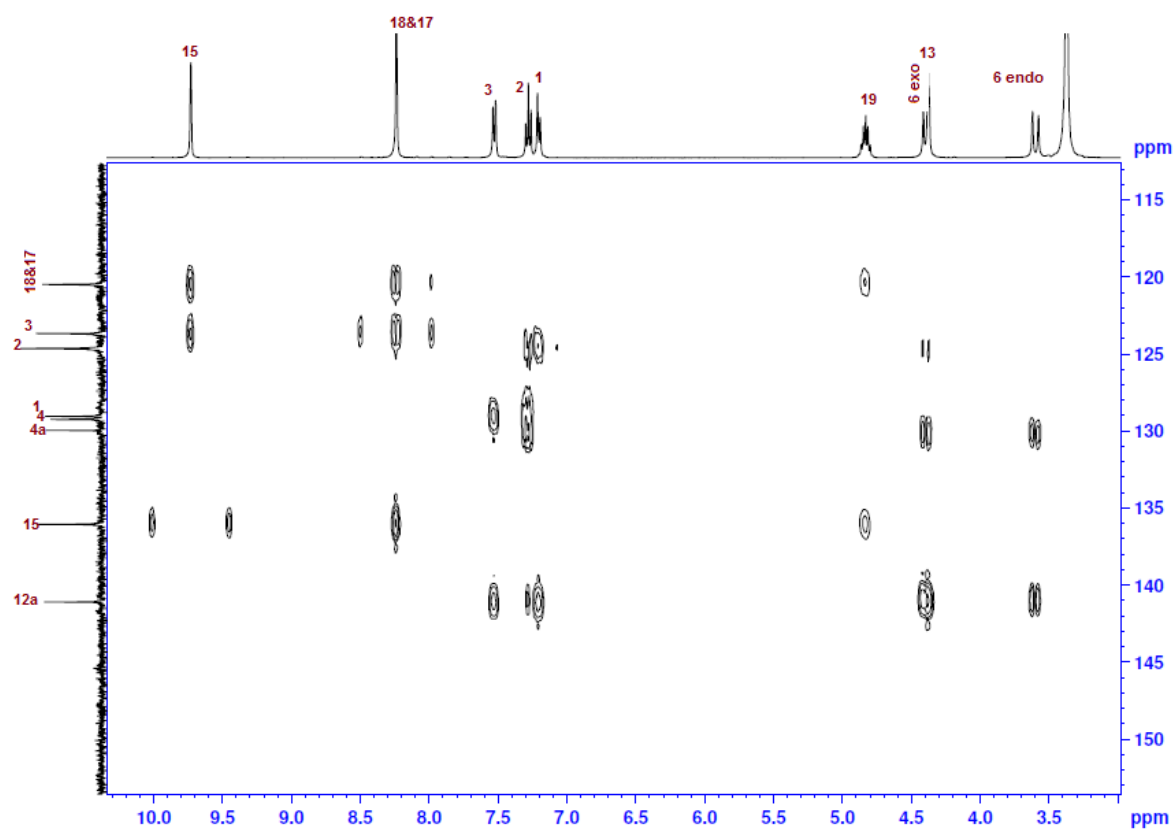

Figure S35: HMBC of **6** expansion

# Supporting Information

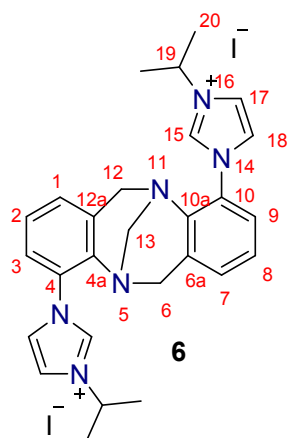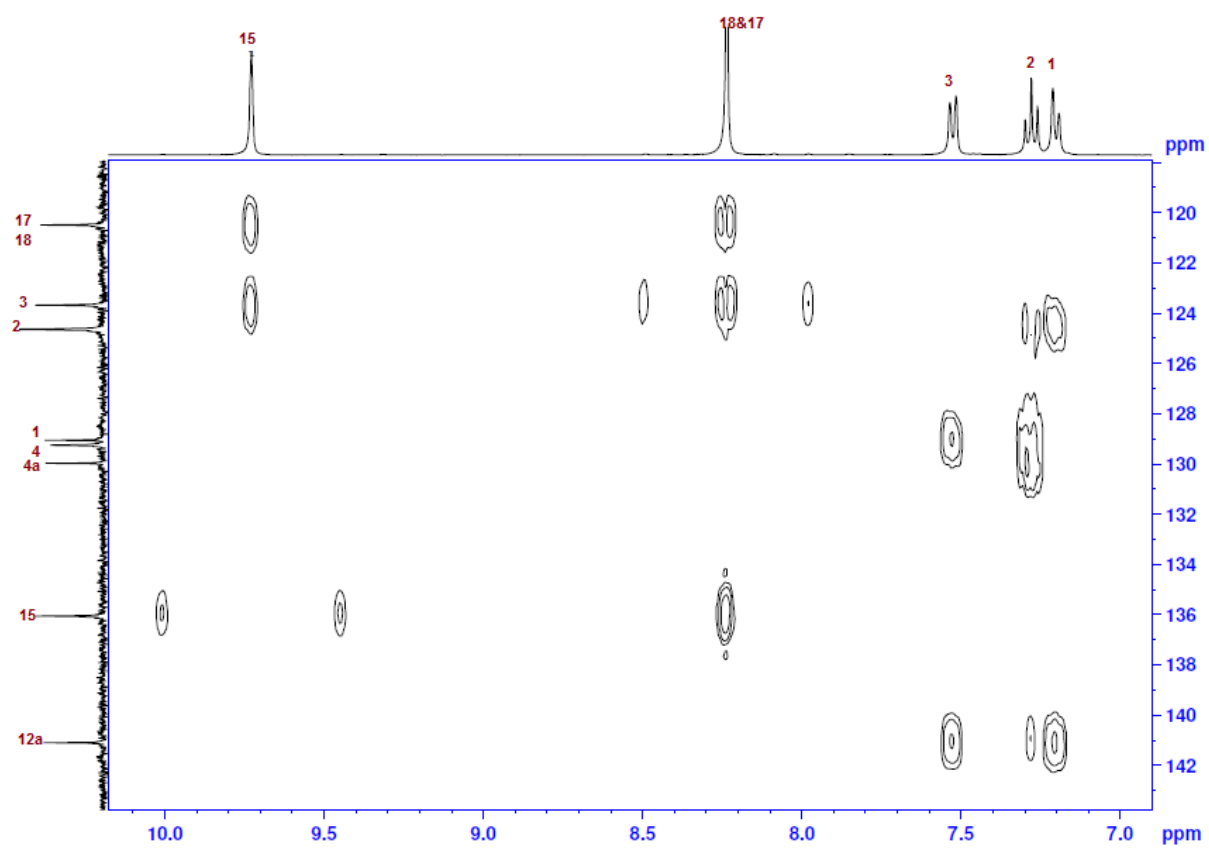

Supporting Information

Figure S36: HMBC of 6 expansion

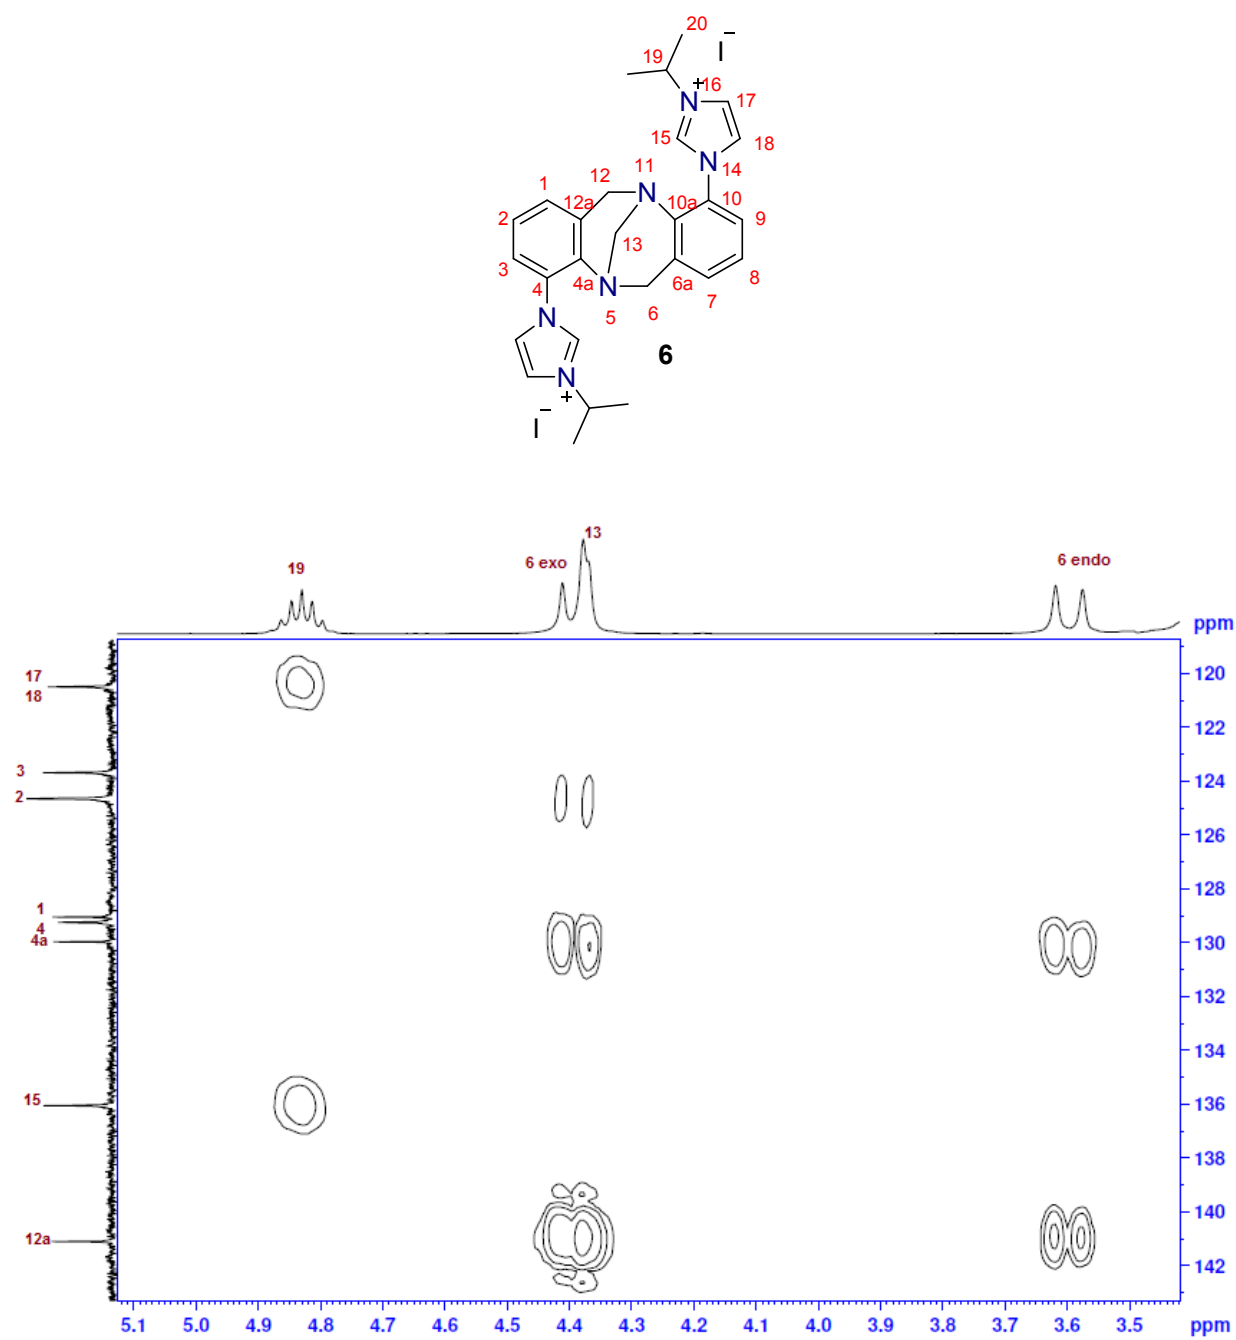

Supporting Information

Figure S37: HSQC of **7** (400 MHz, DMSO-*d*<sub>6</sub>, RT)

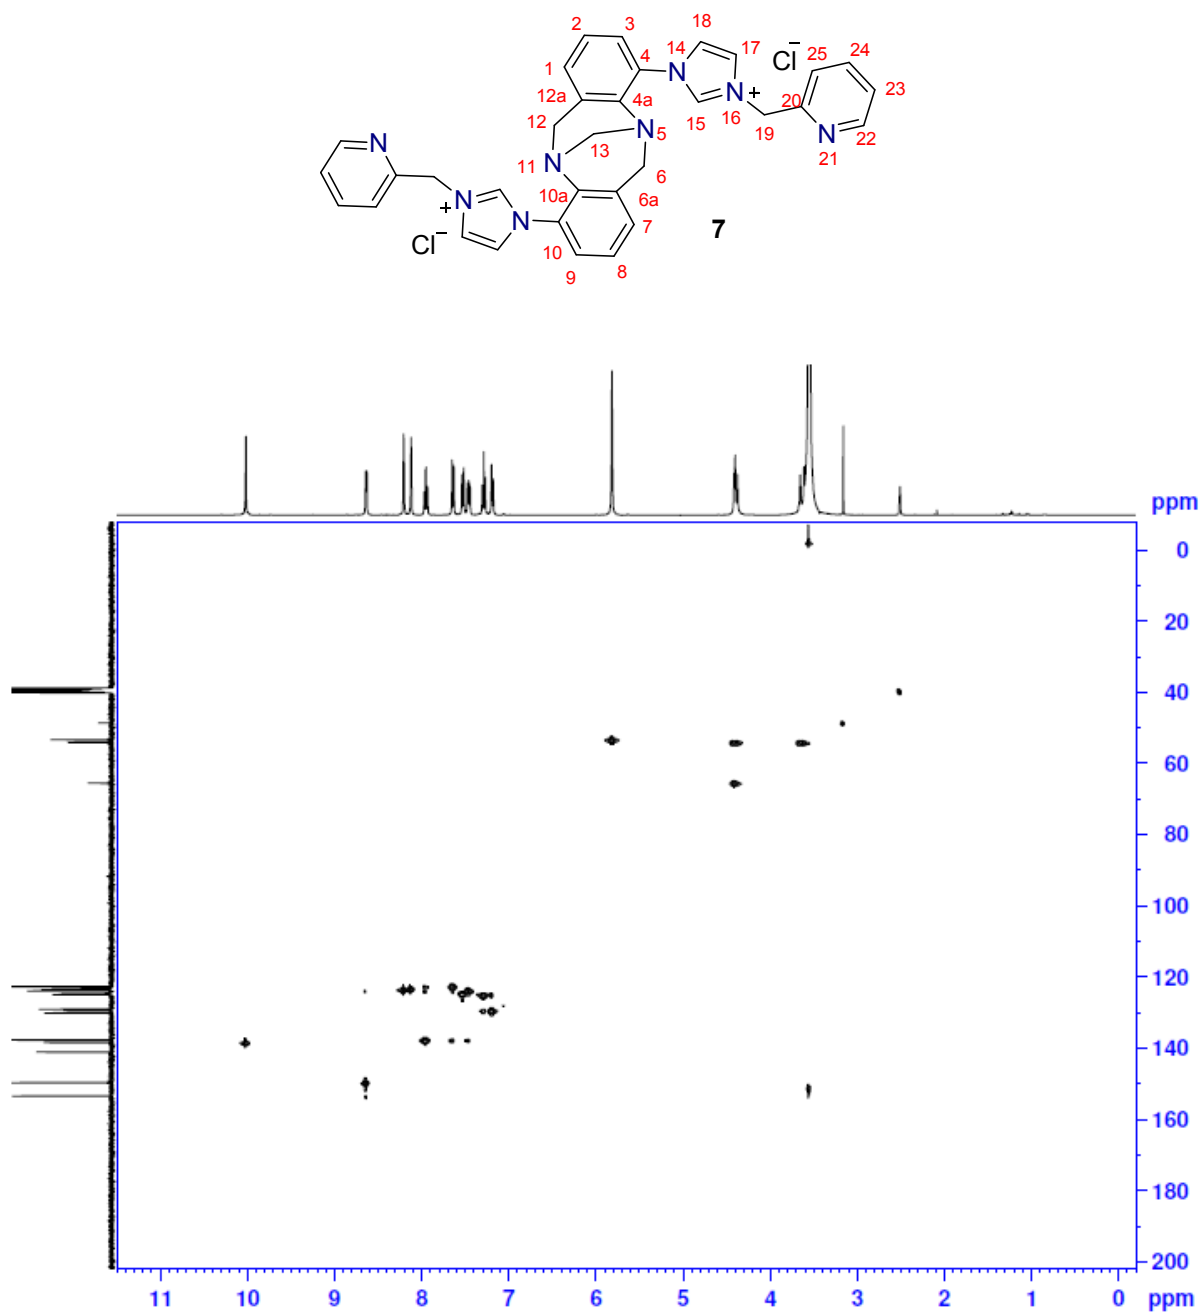

Supporting Information

Figure S38: HSQC of 7 expansion

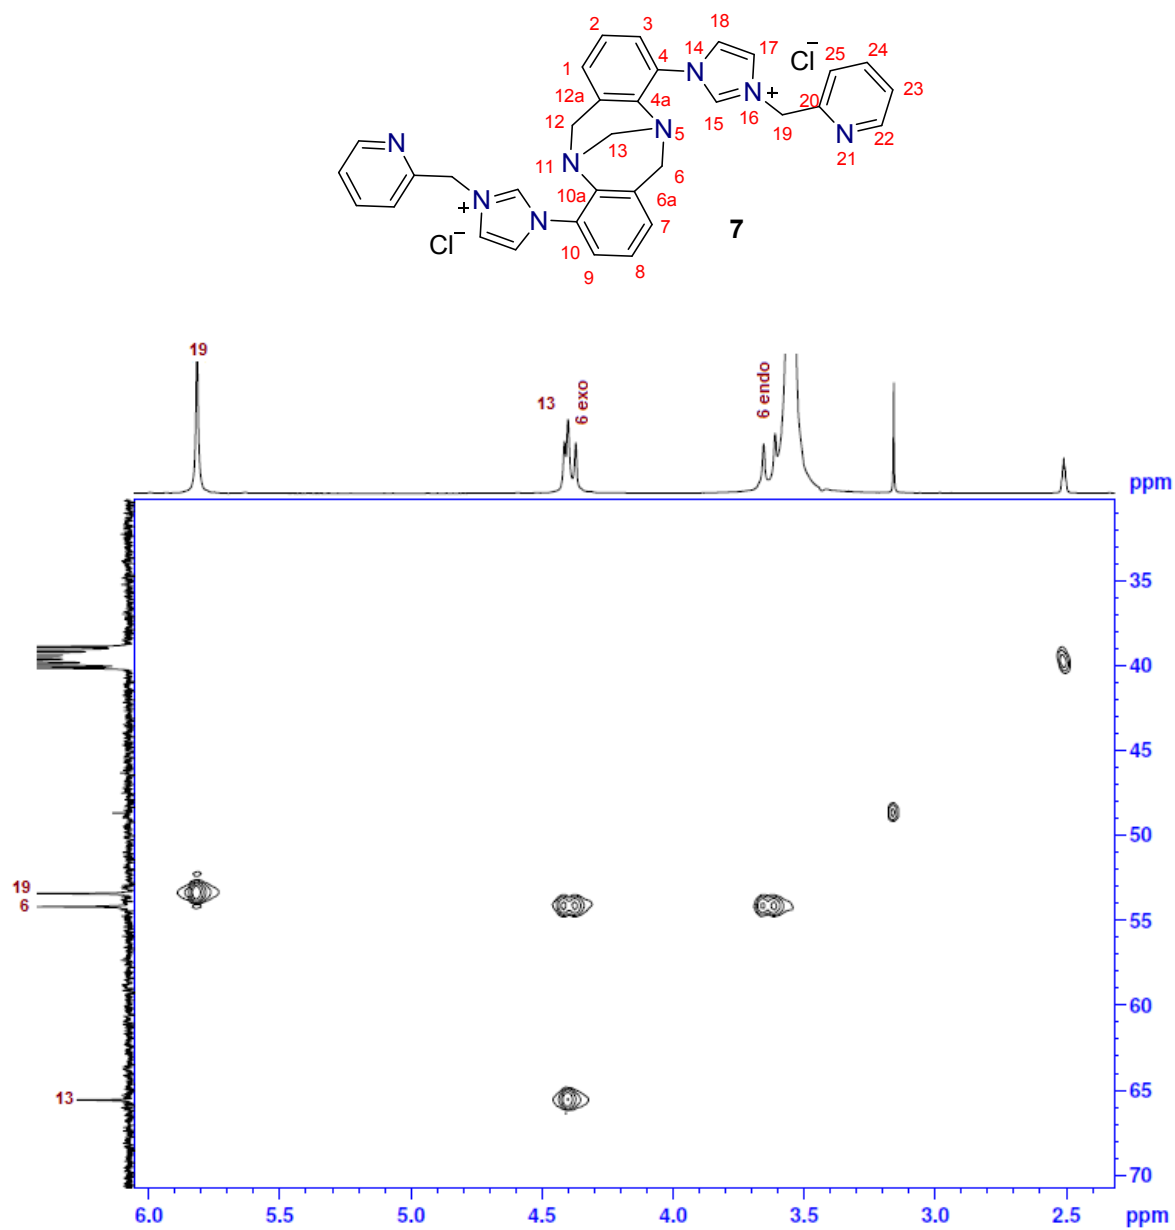

## Supporting Information

Figure S39: HSQC of 7 expansion

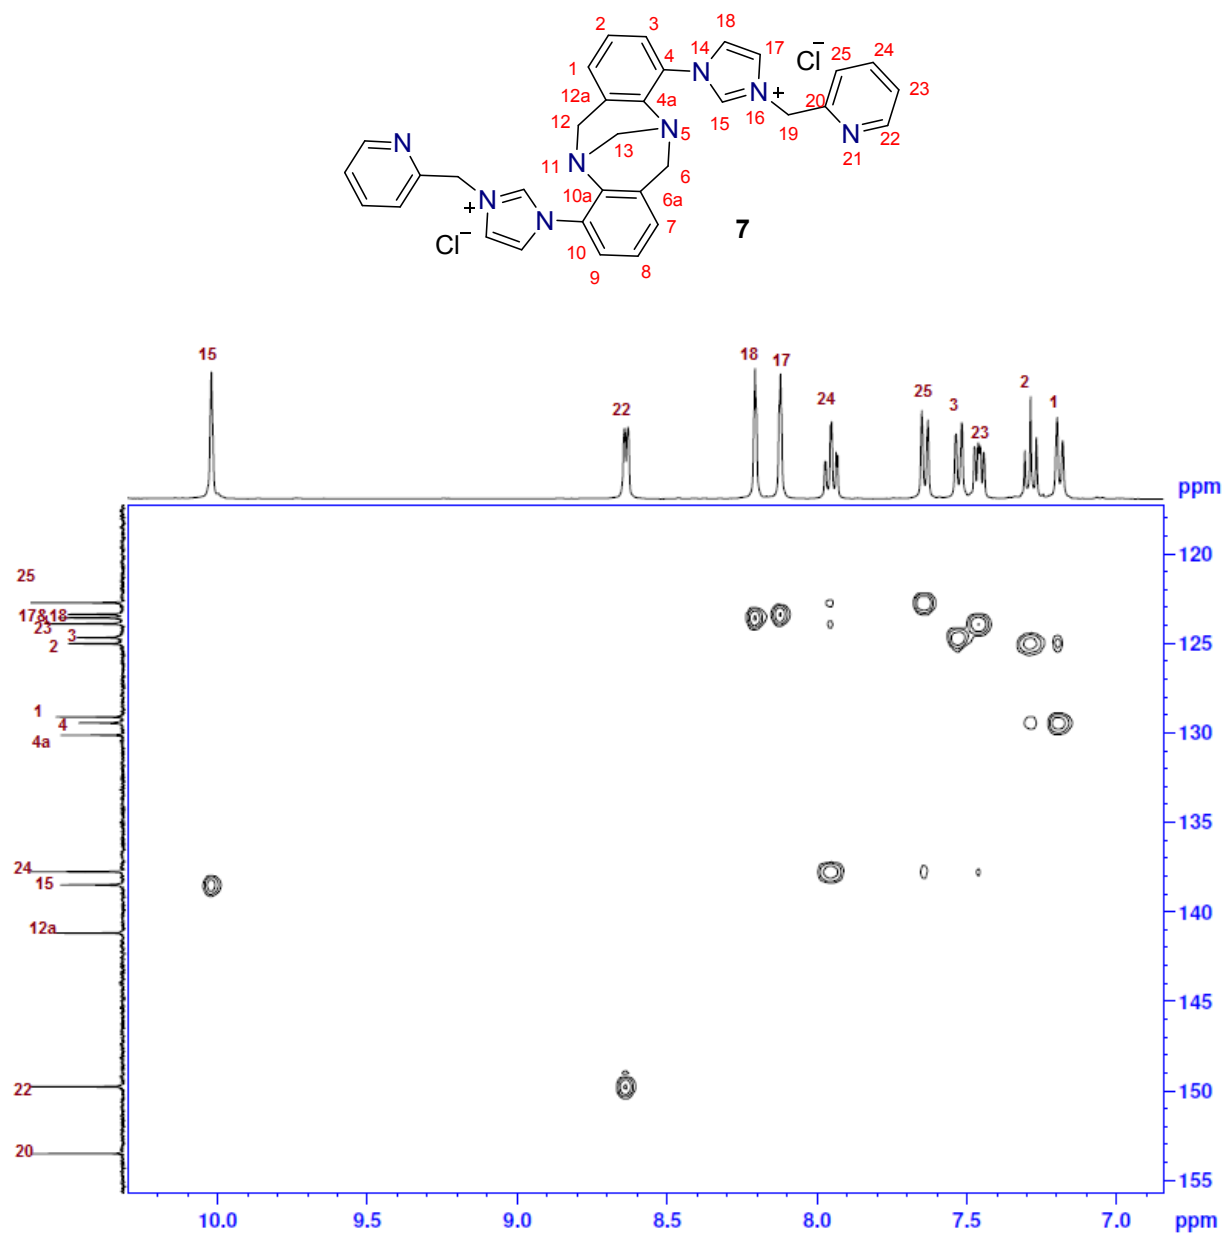

Supporting Information

Figure S40: HMBC of 7 (400 MHz, DMSO-*d*<sub>6</sub>, RT)

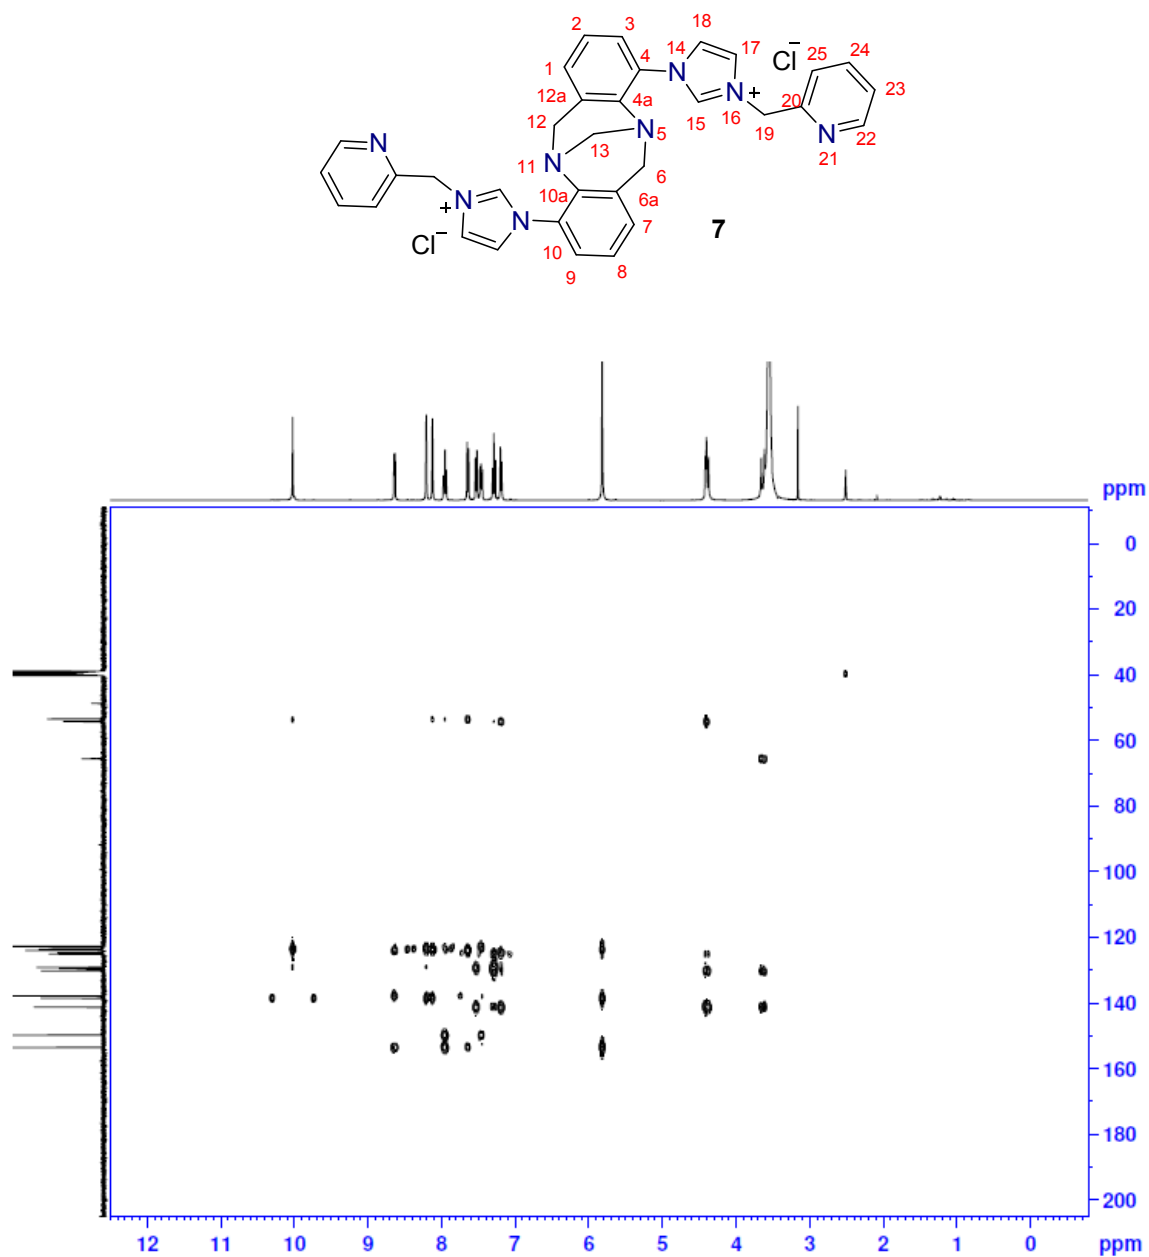



## Supporting Information

Figure S41: HMBC of **7** expansion

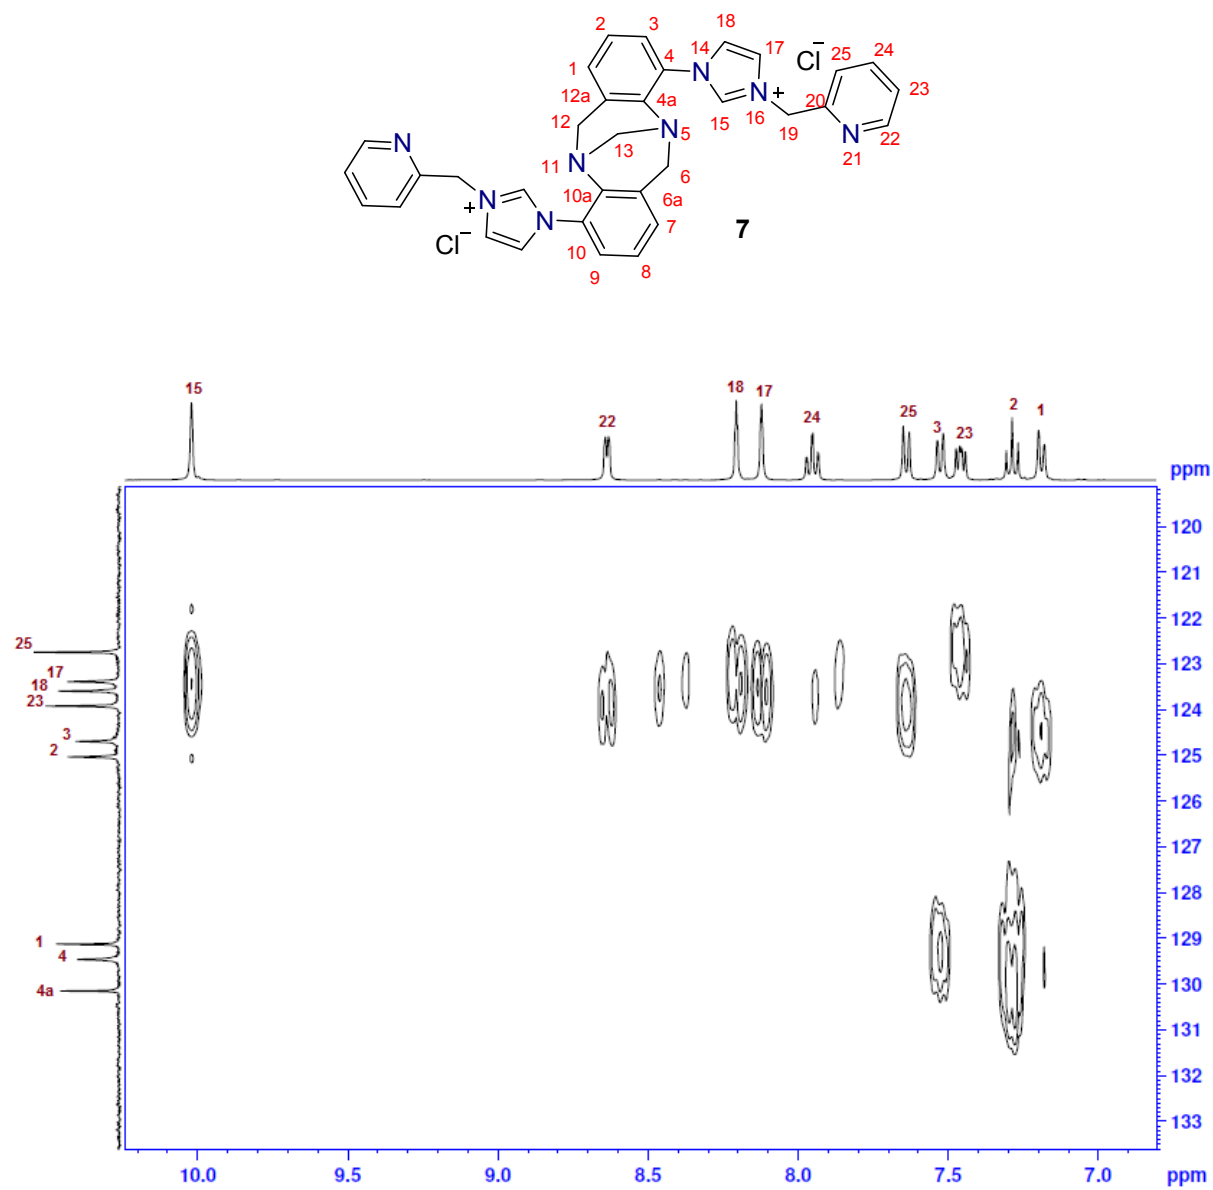

## Supporting Information

Figure S42: HMBC of 7 expansion

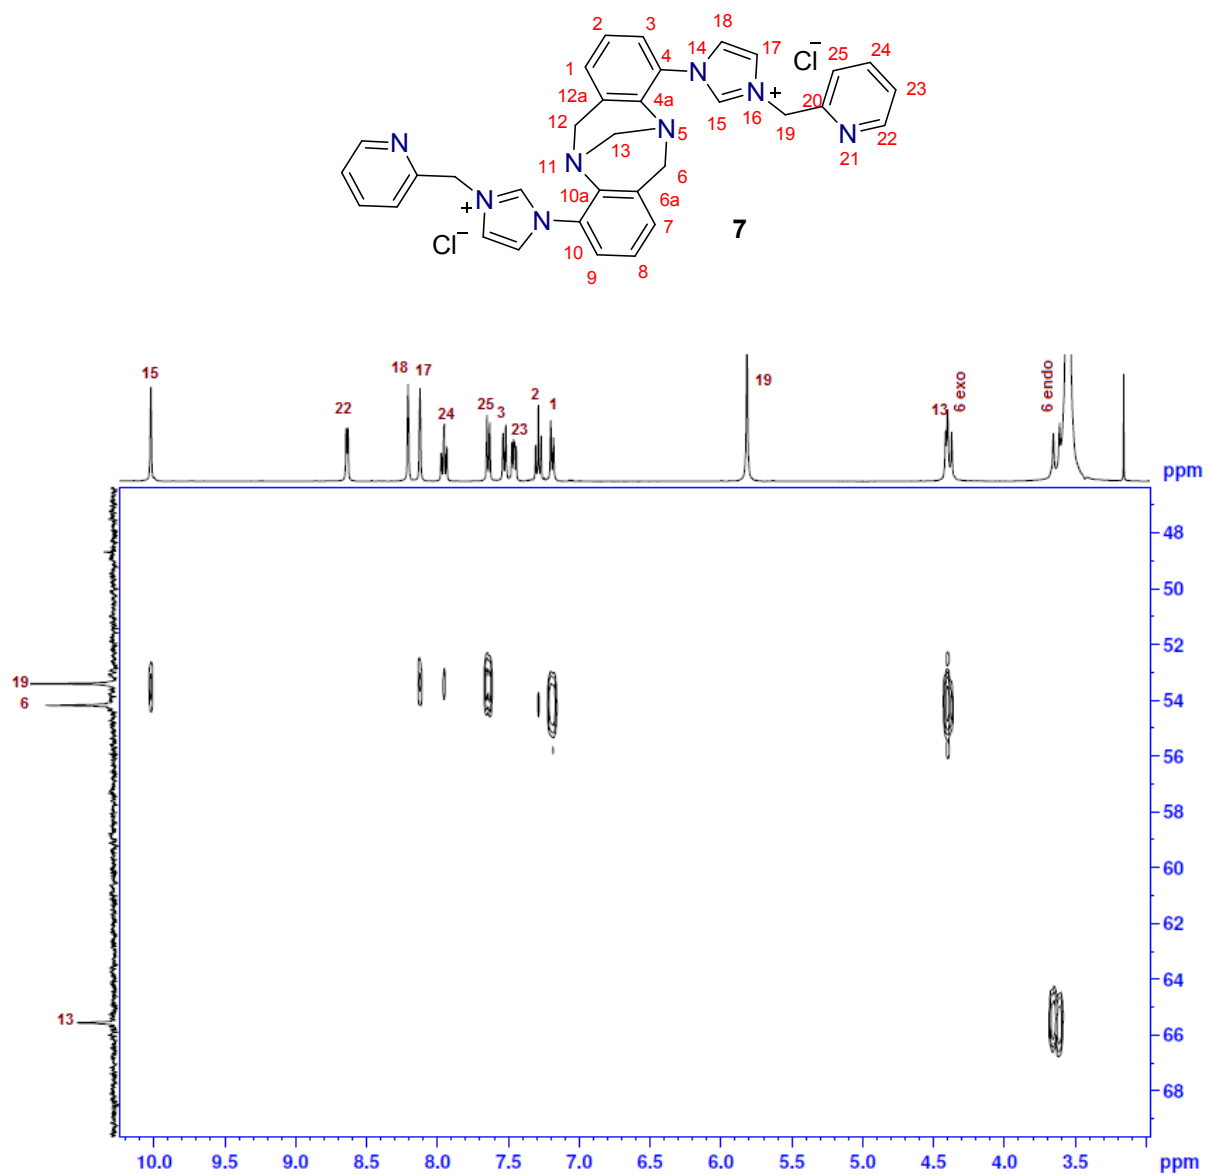

Supporting Information

Figure S43: HMBC of 7 expansion

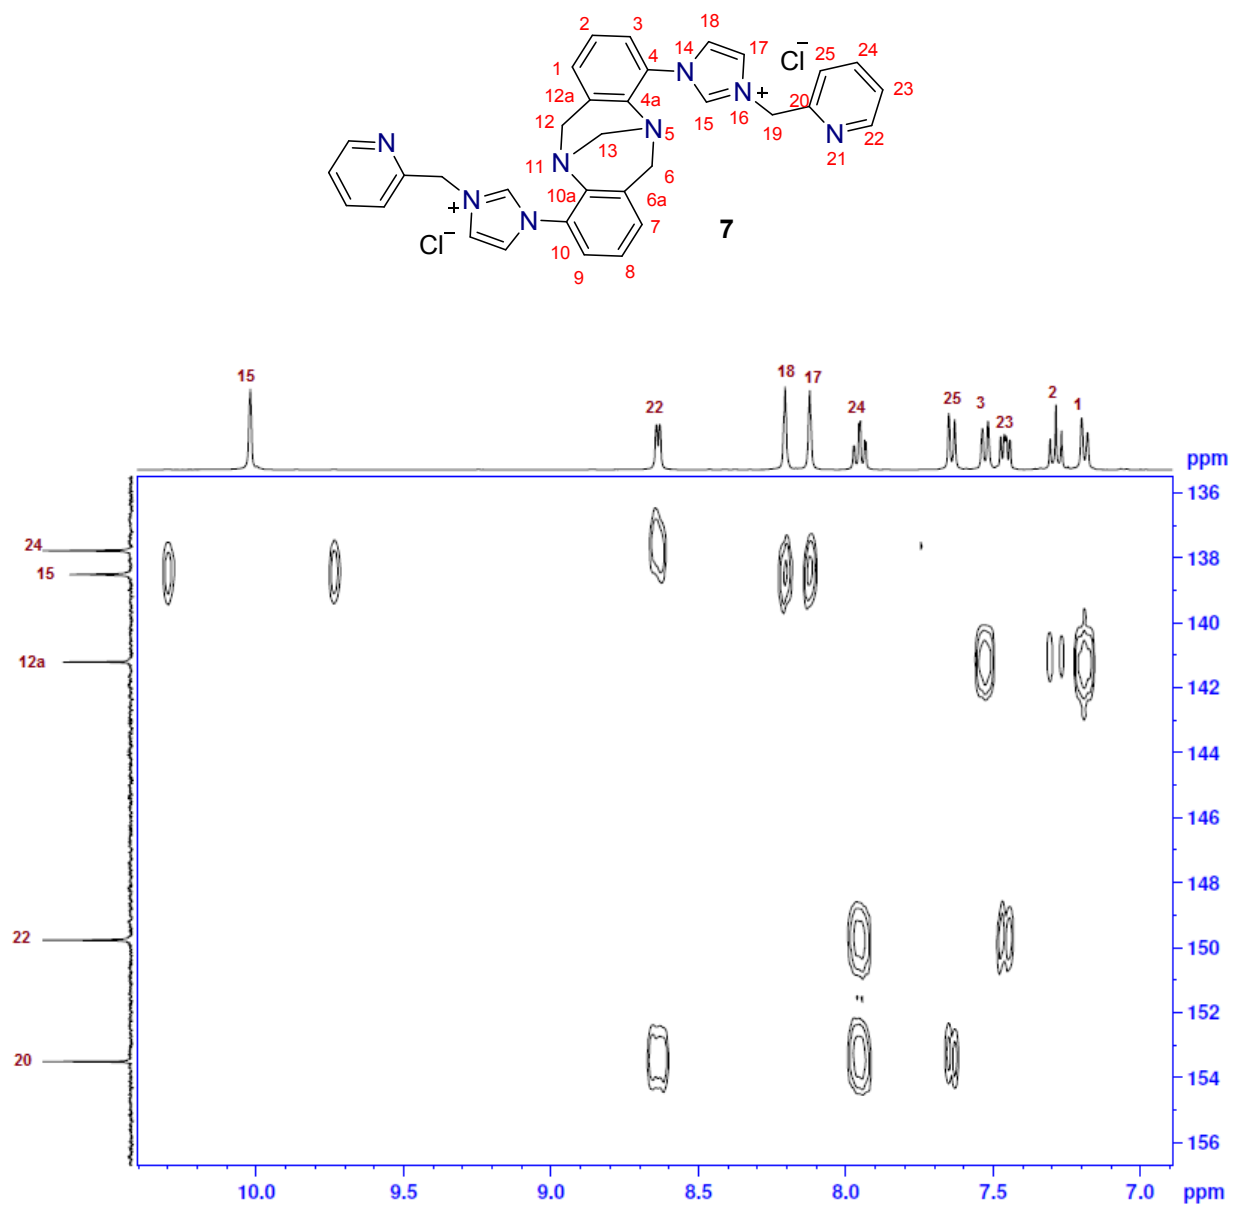

## Supporting Information

Figure S44: HMBC of 7 expansion

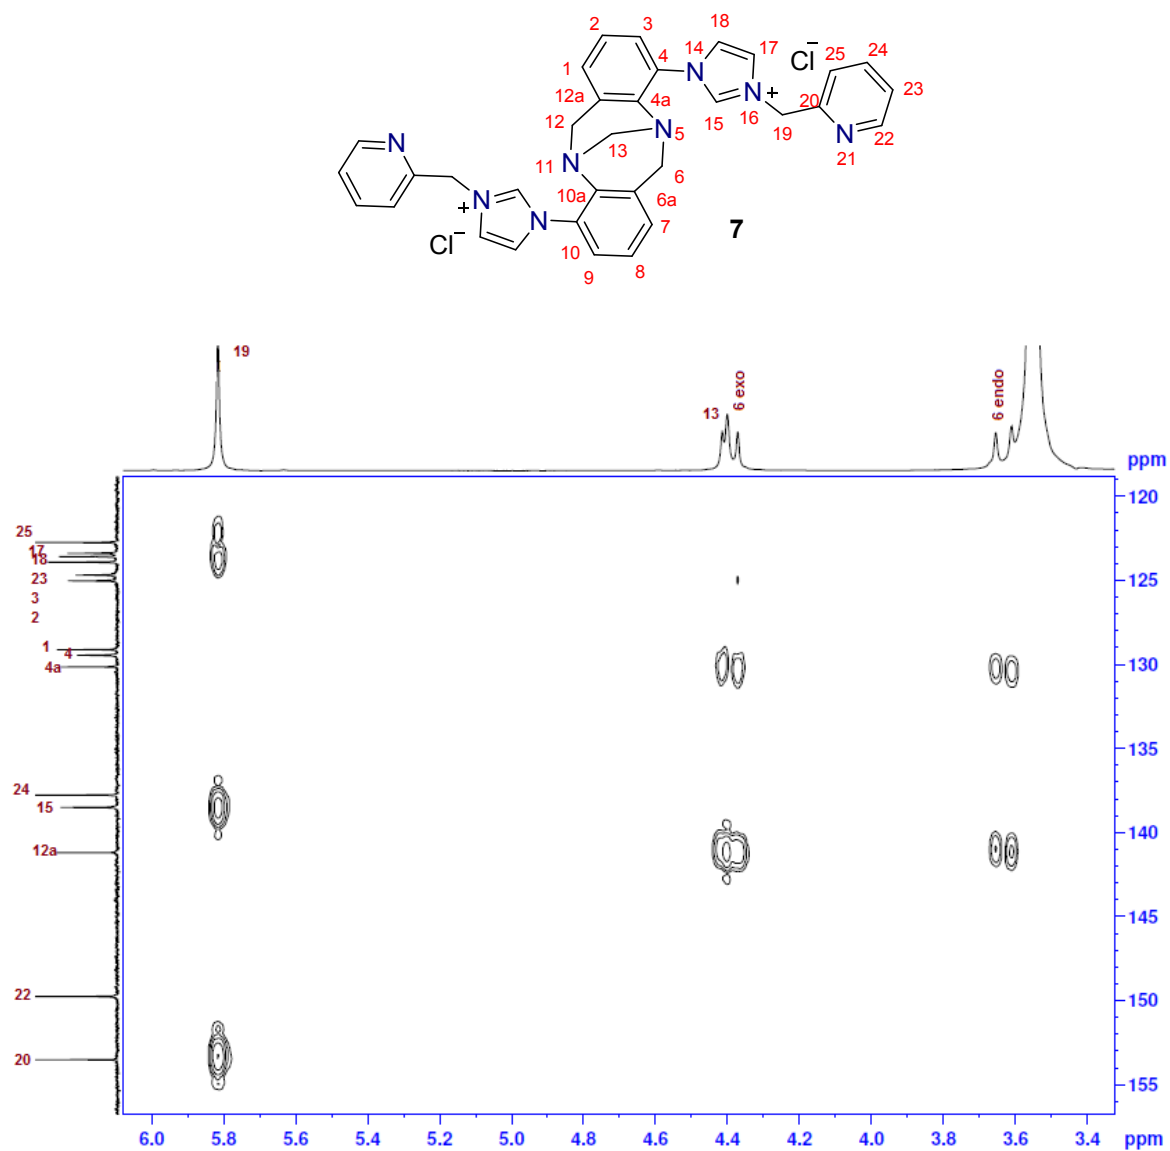

Supporting Information

Figure S45: HSQC of **8** (400 MHz, DMSO-*d*<sub>6</sub>, RT)

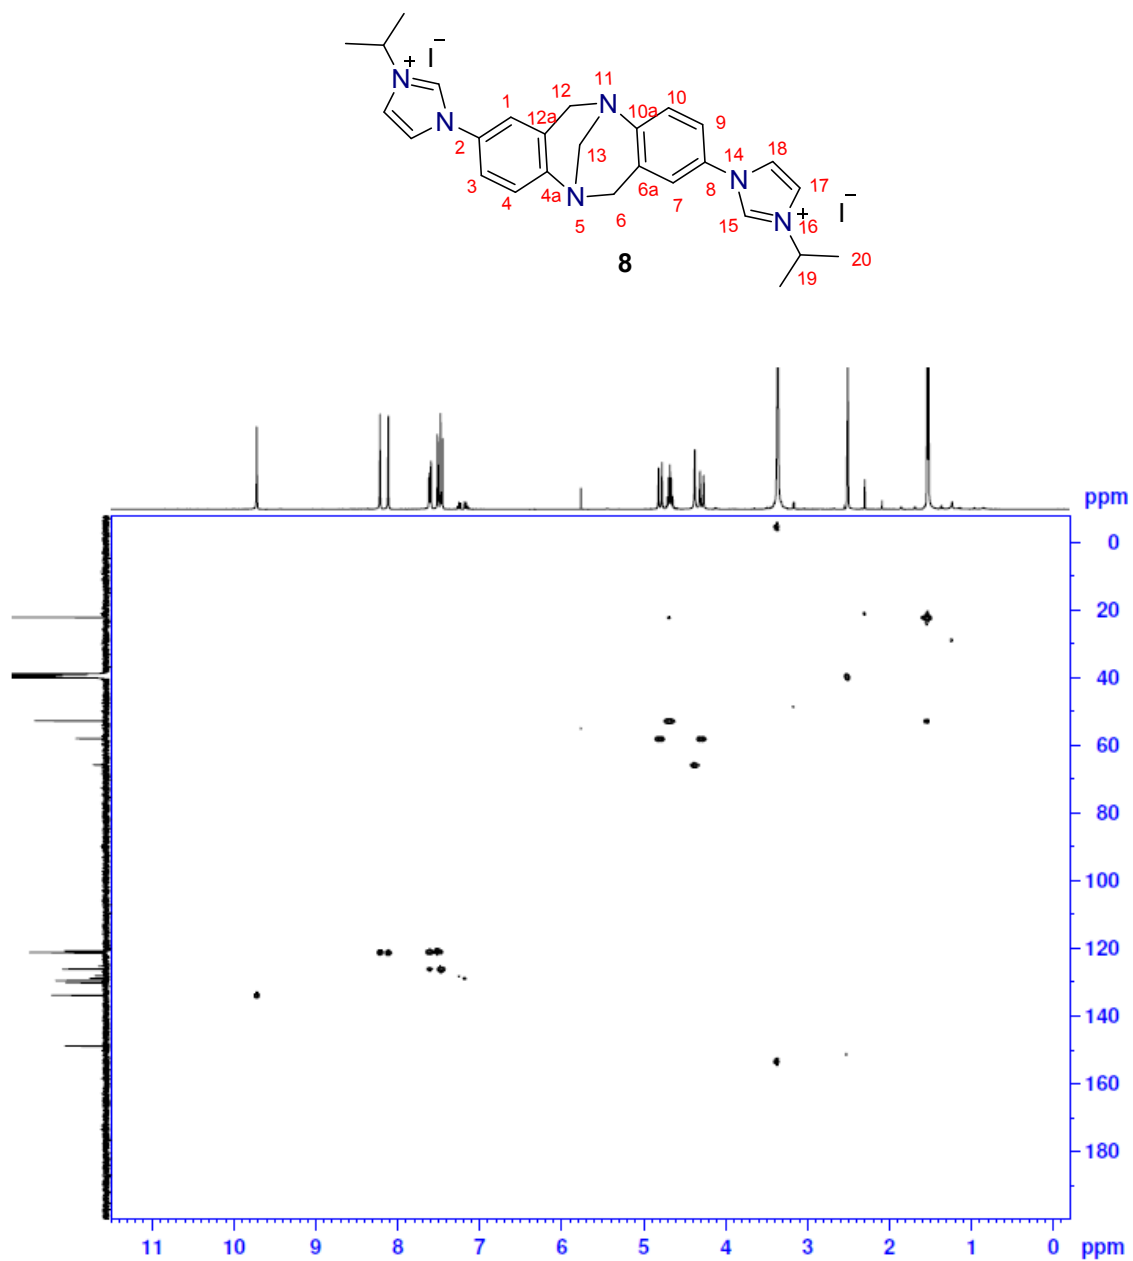

Supporting Information

Figure S46: HSQC of **8** expansion

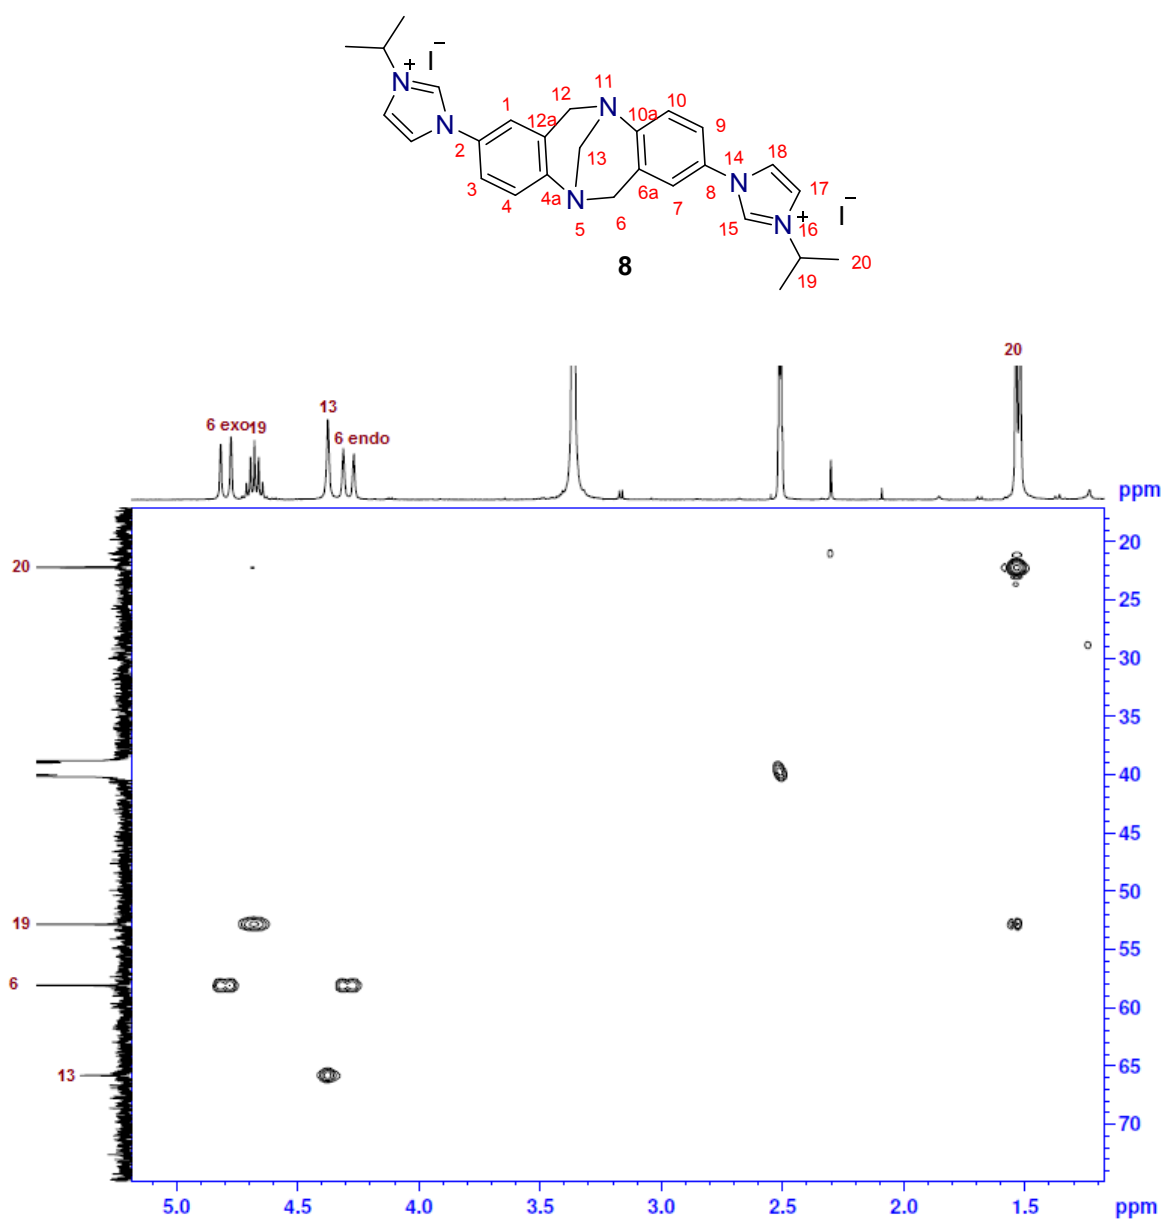

Supporting Information

Figure S47: HSQC of 8 expansion

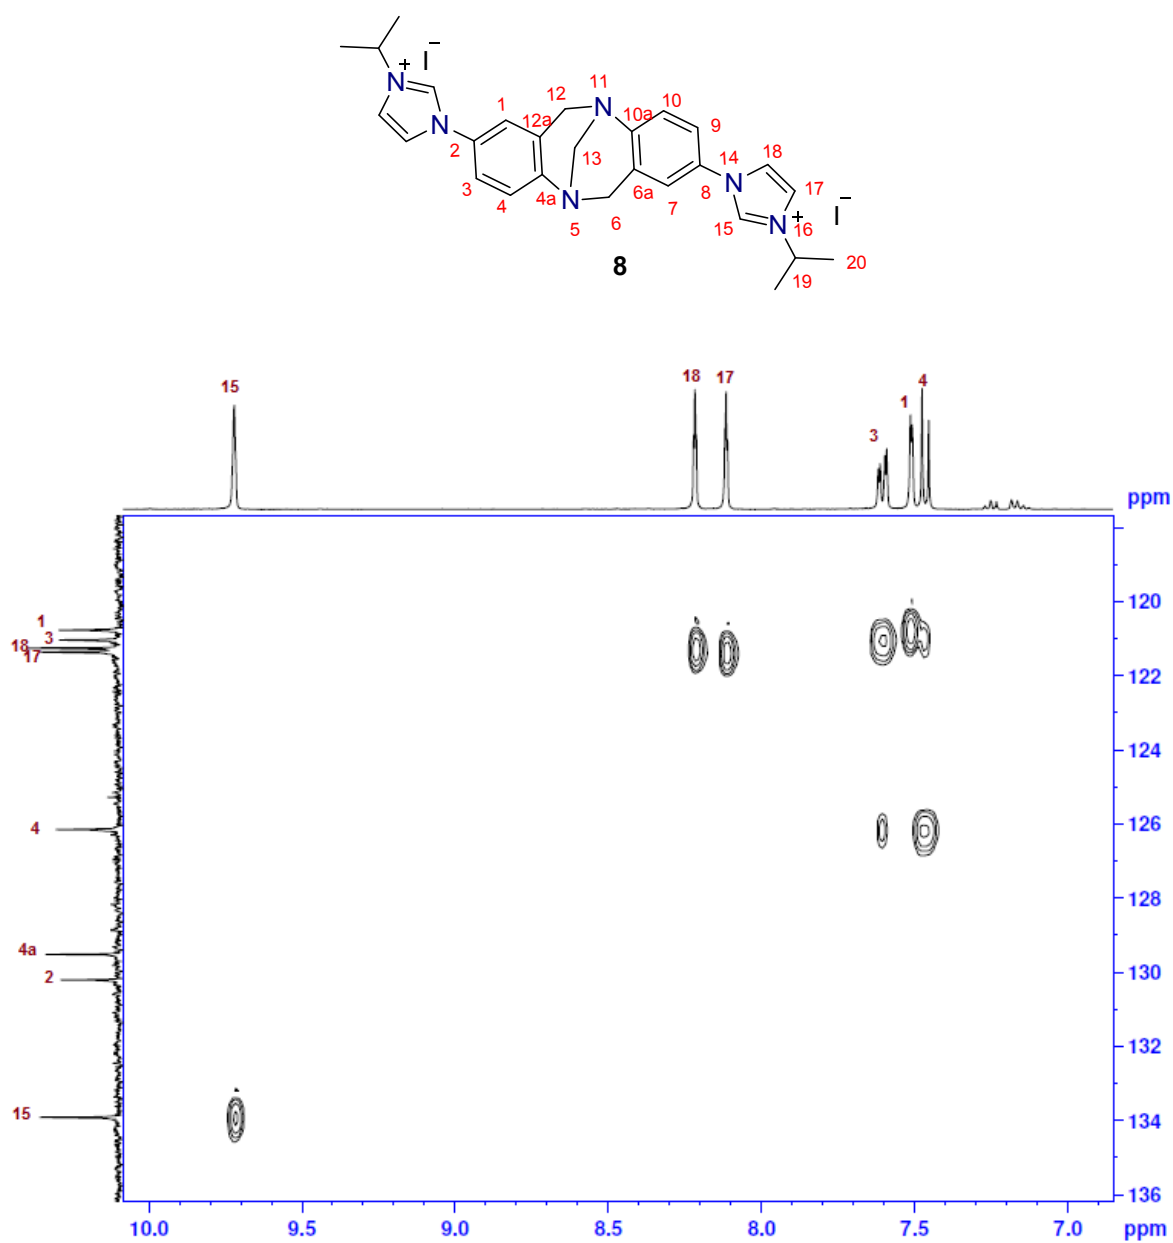

Supporting Information

Figure S48: HMBC of **8** (400 MHz, DMSO-*d*<sub>6</sub>, RT)

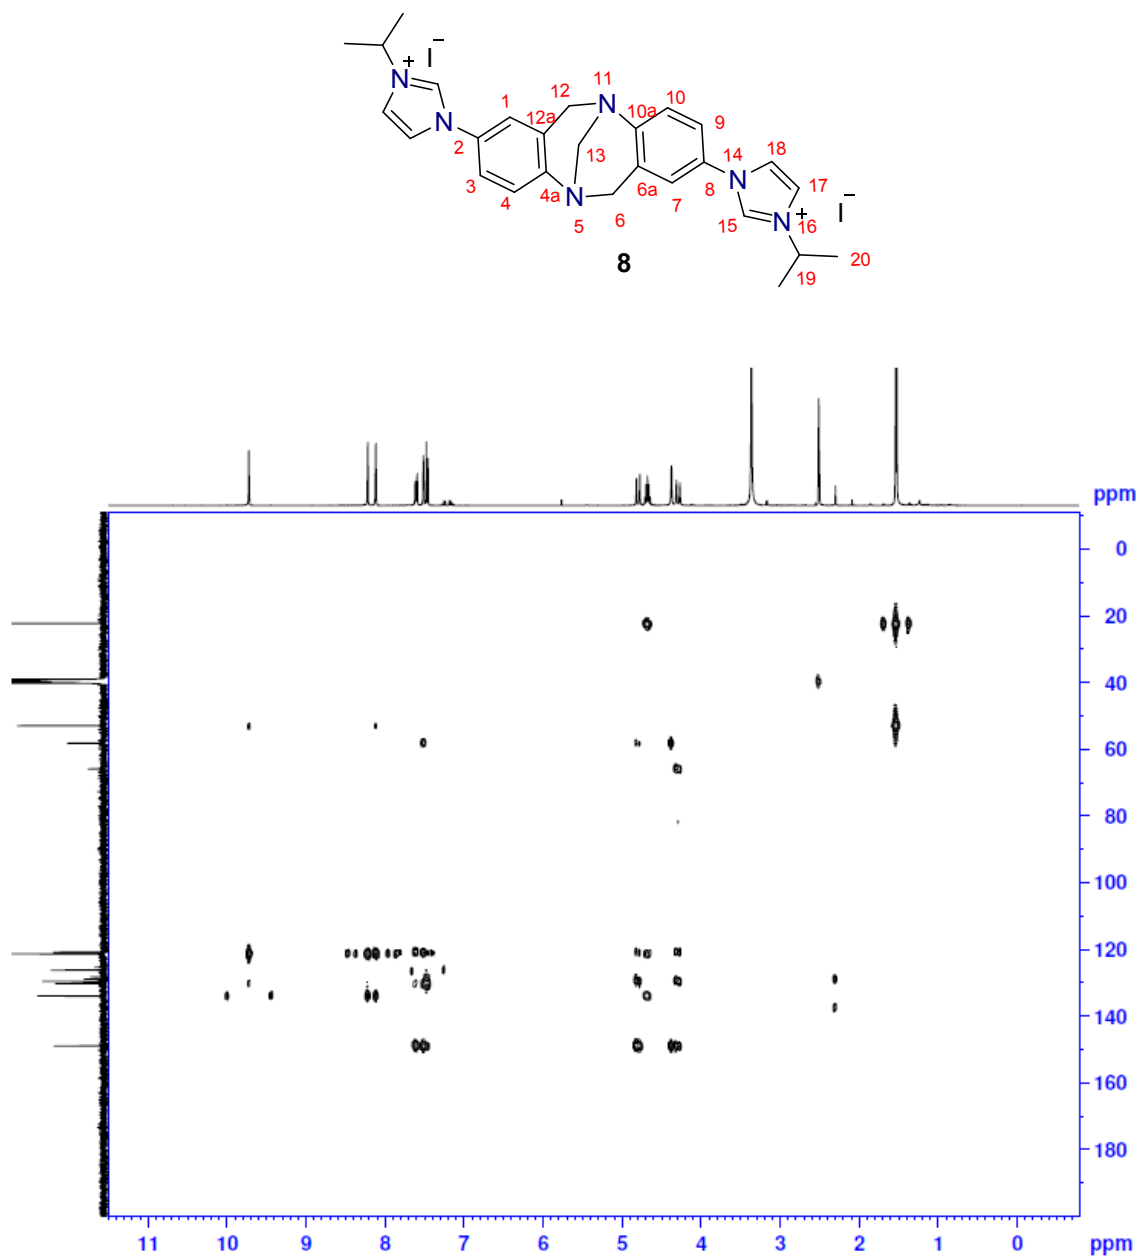



Supporting Information

Figure S49: HMBC of 8 expansion

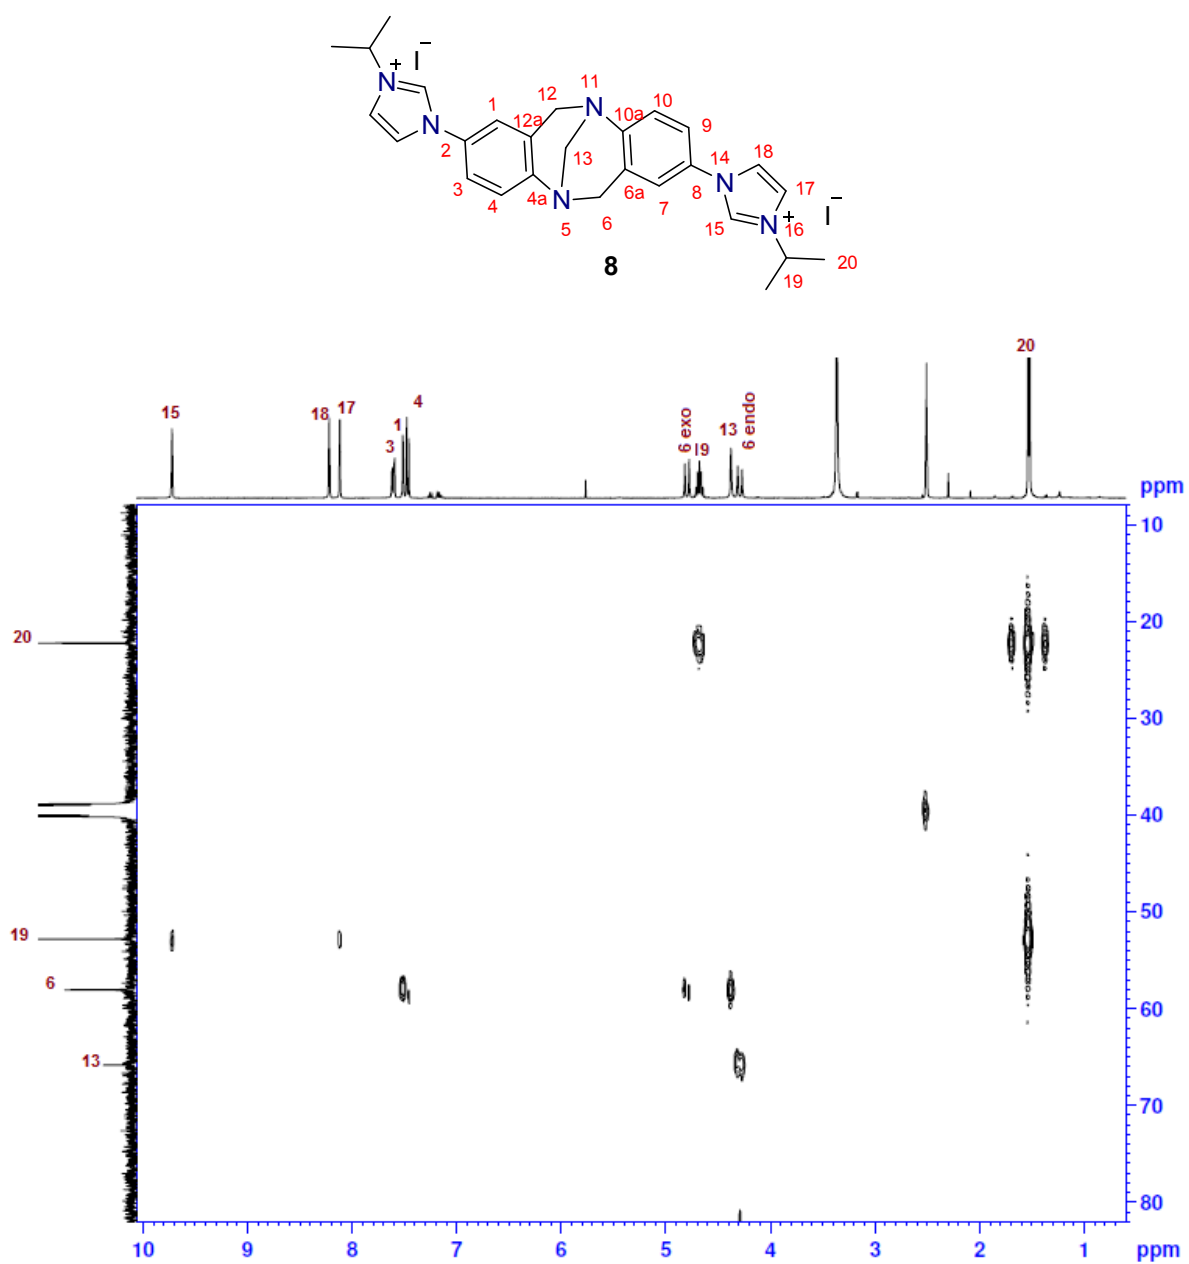

Supporting Information

Figure S50: HMBC of 8 expansion

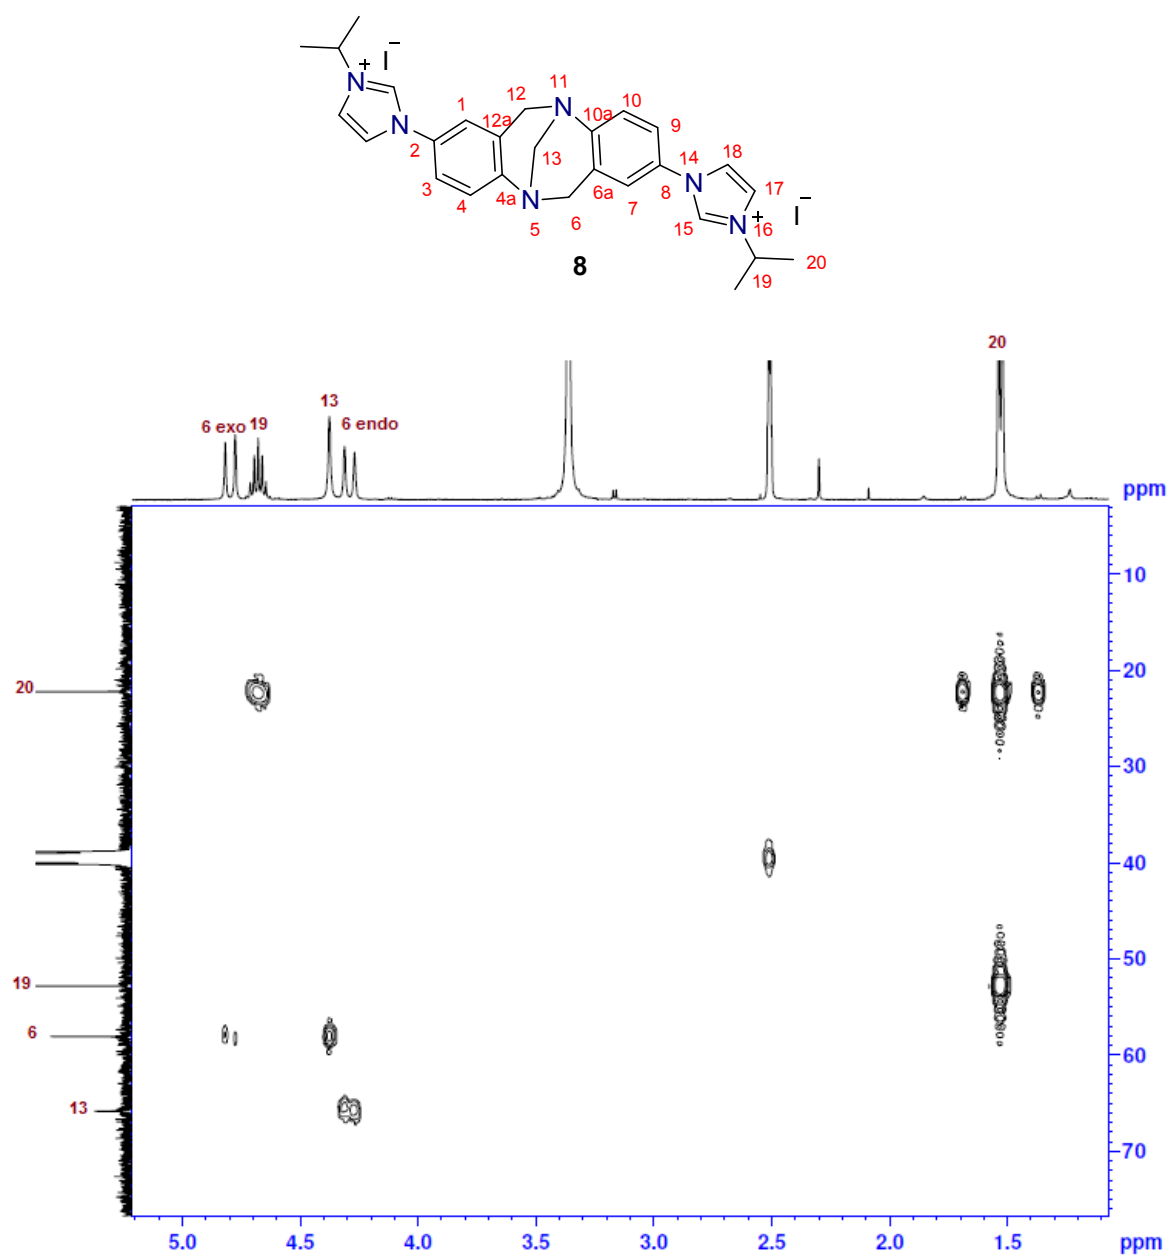

Supporting Information

Figure S51: HMBC of 8 expansion

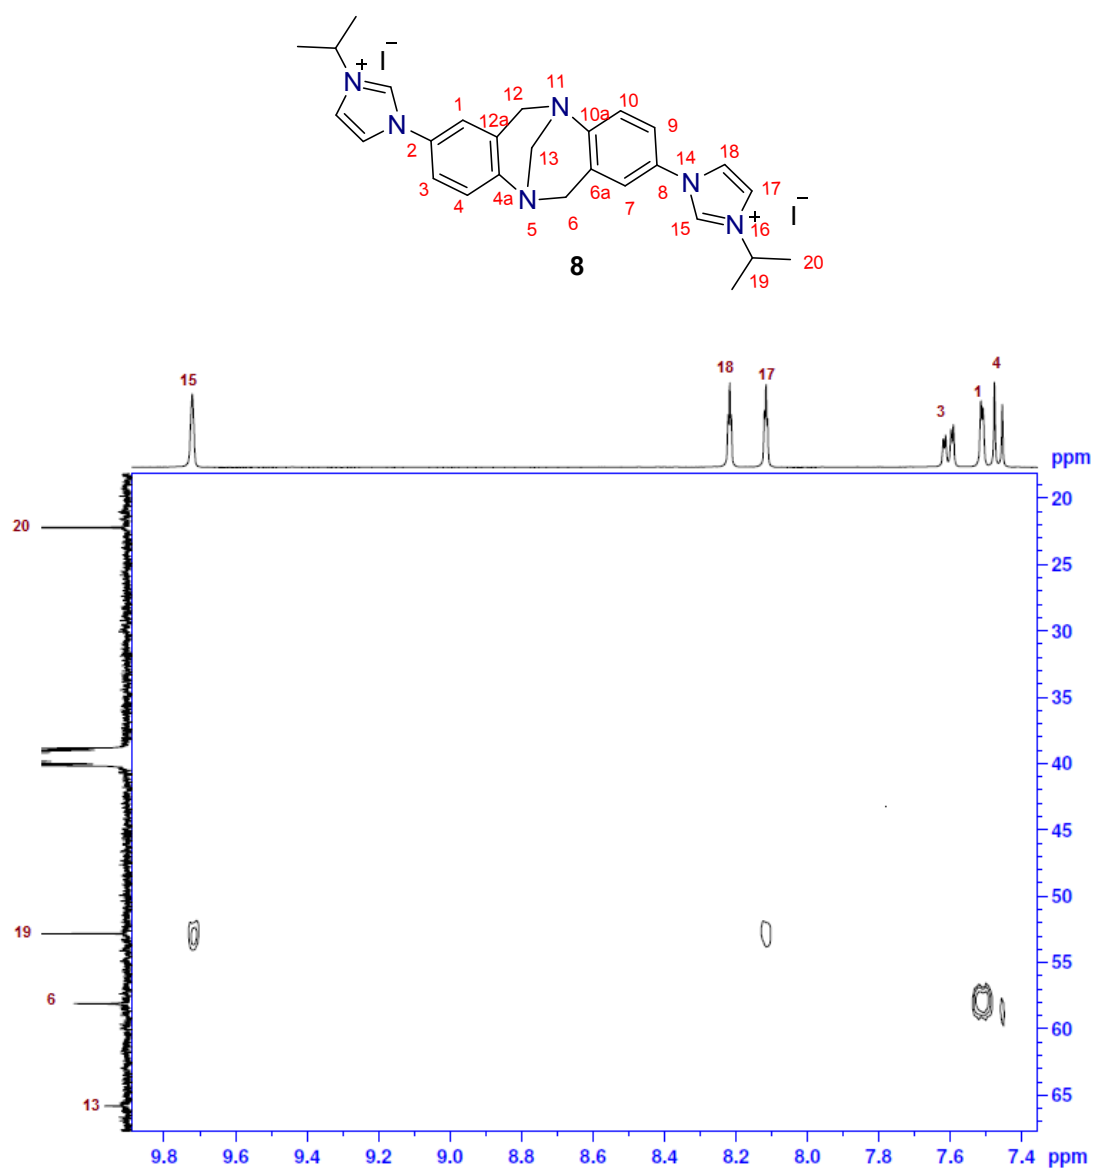

Supporting Information

Figure S52: HMBC of 8 expansion

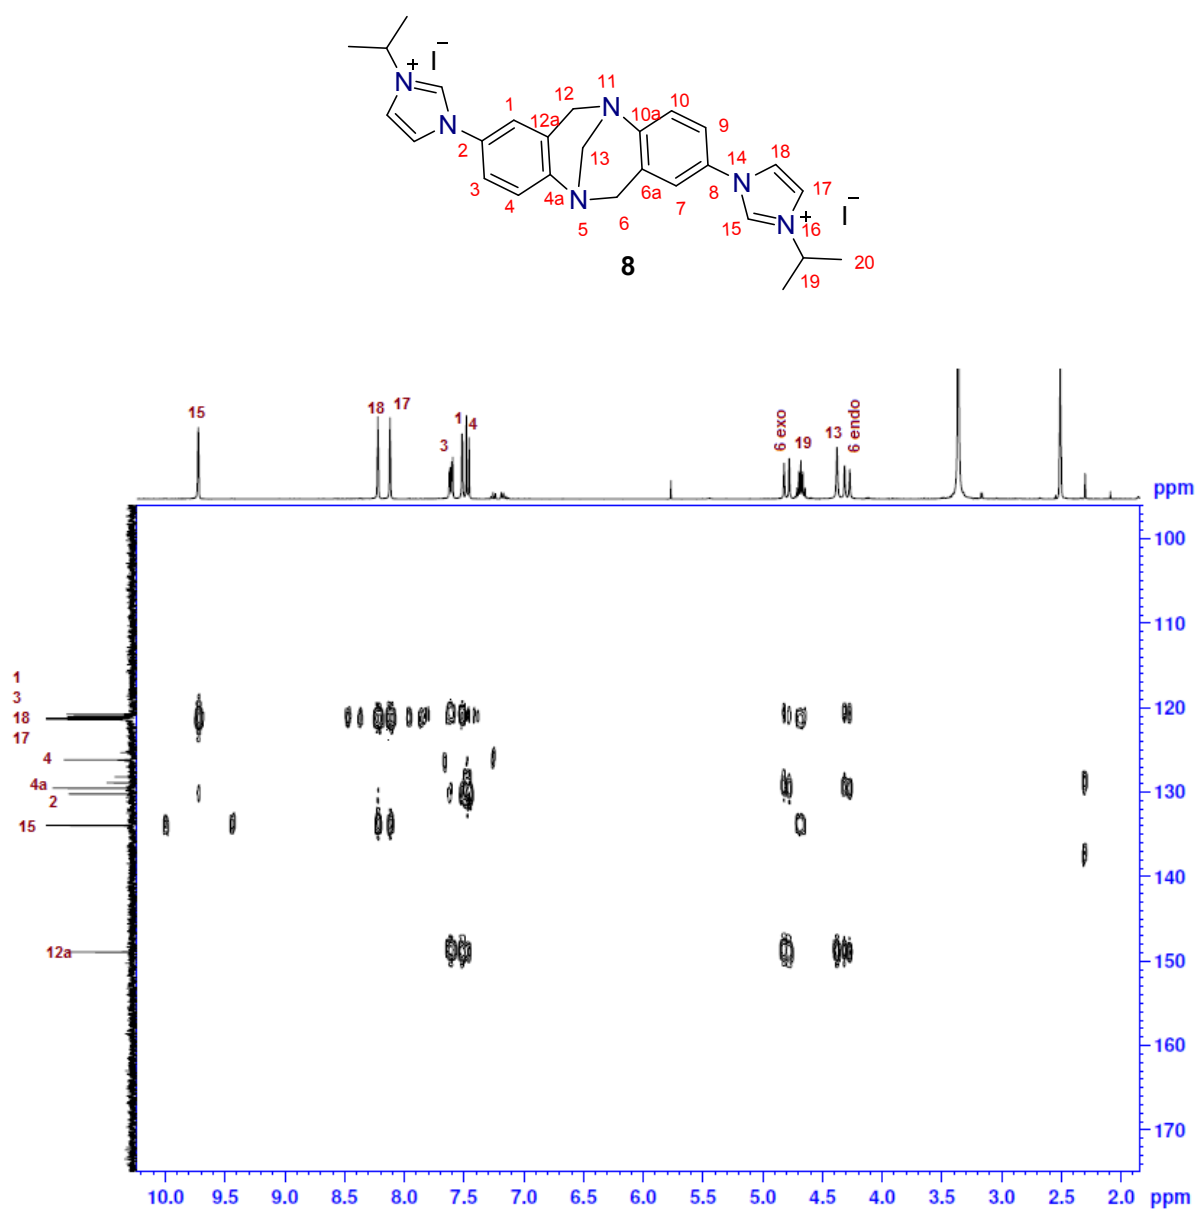

Supporting Information

Figure S53: HSQC of **9** (400 MHz, DMSO-*d*<sub>6</sub>, RT)

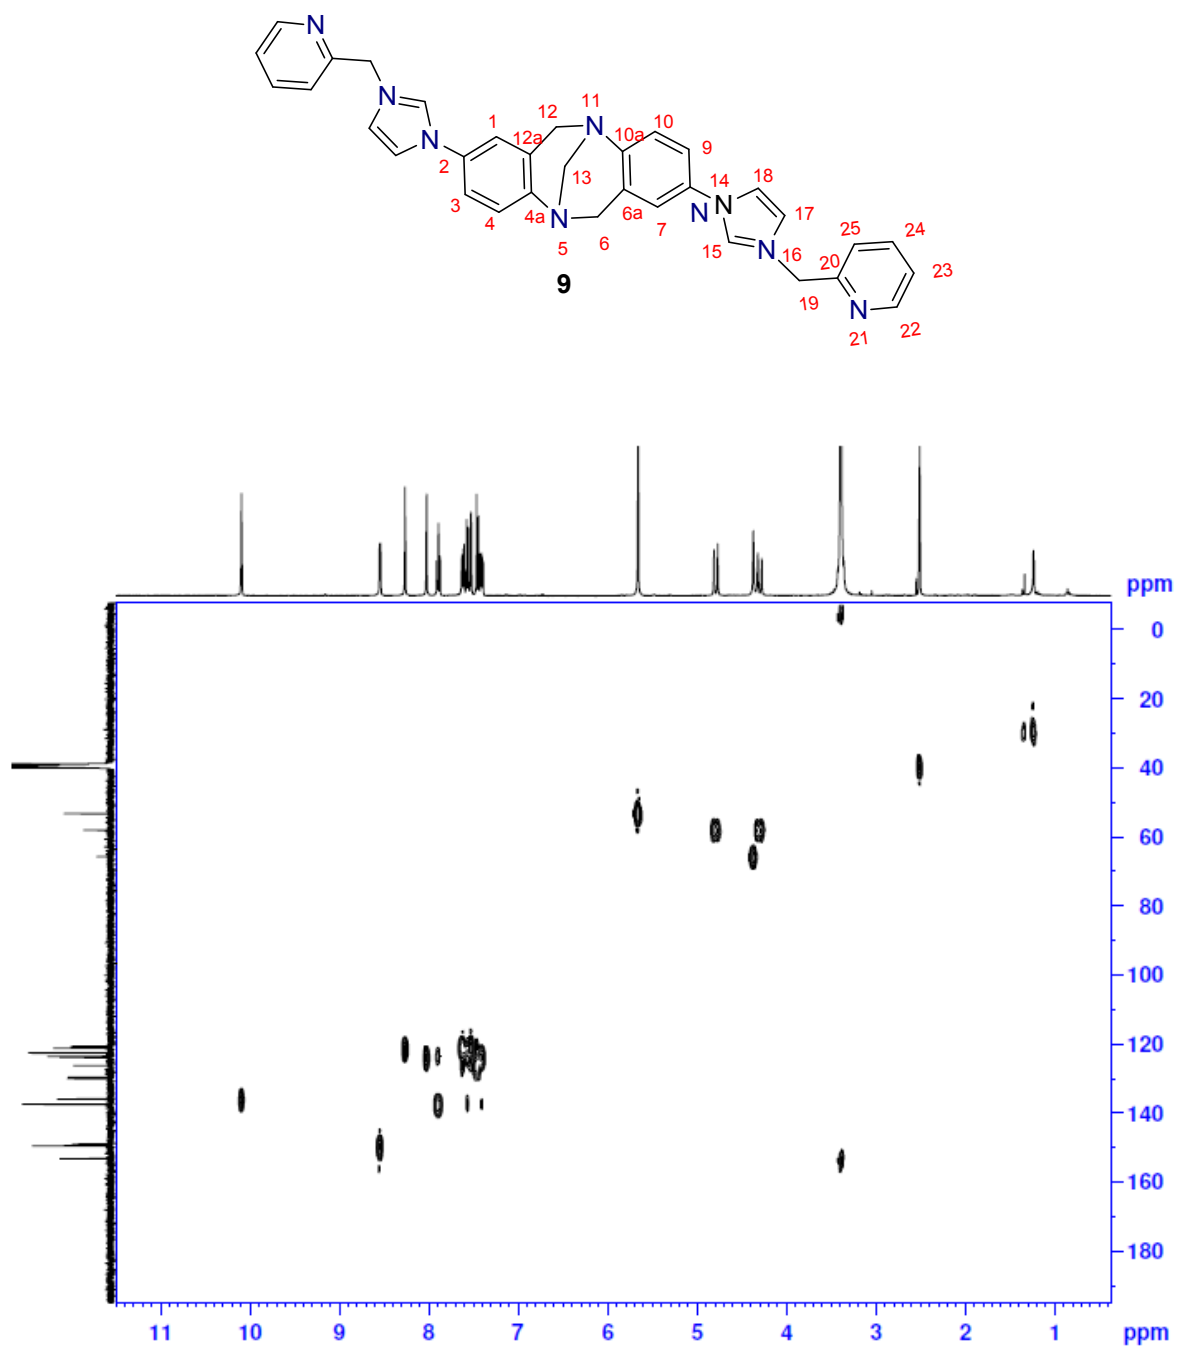

Supporting Information

Figure S54: HSQC of 9 expansion

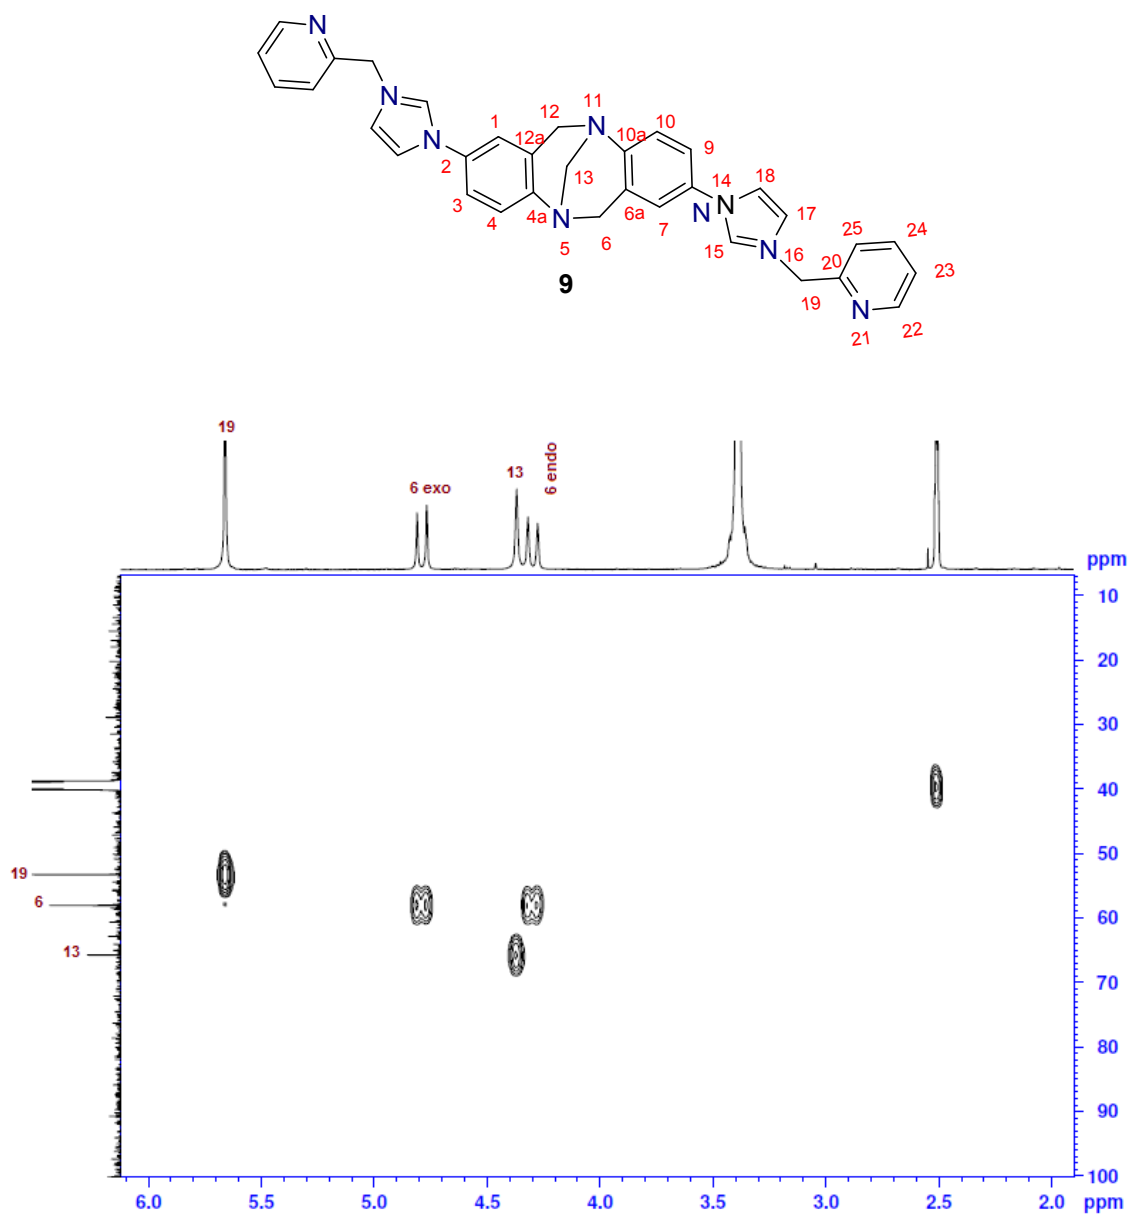

Supporting Information

Figure S55: HSQC of 9 expansion

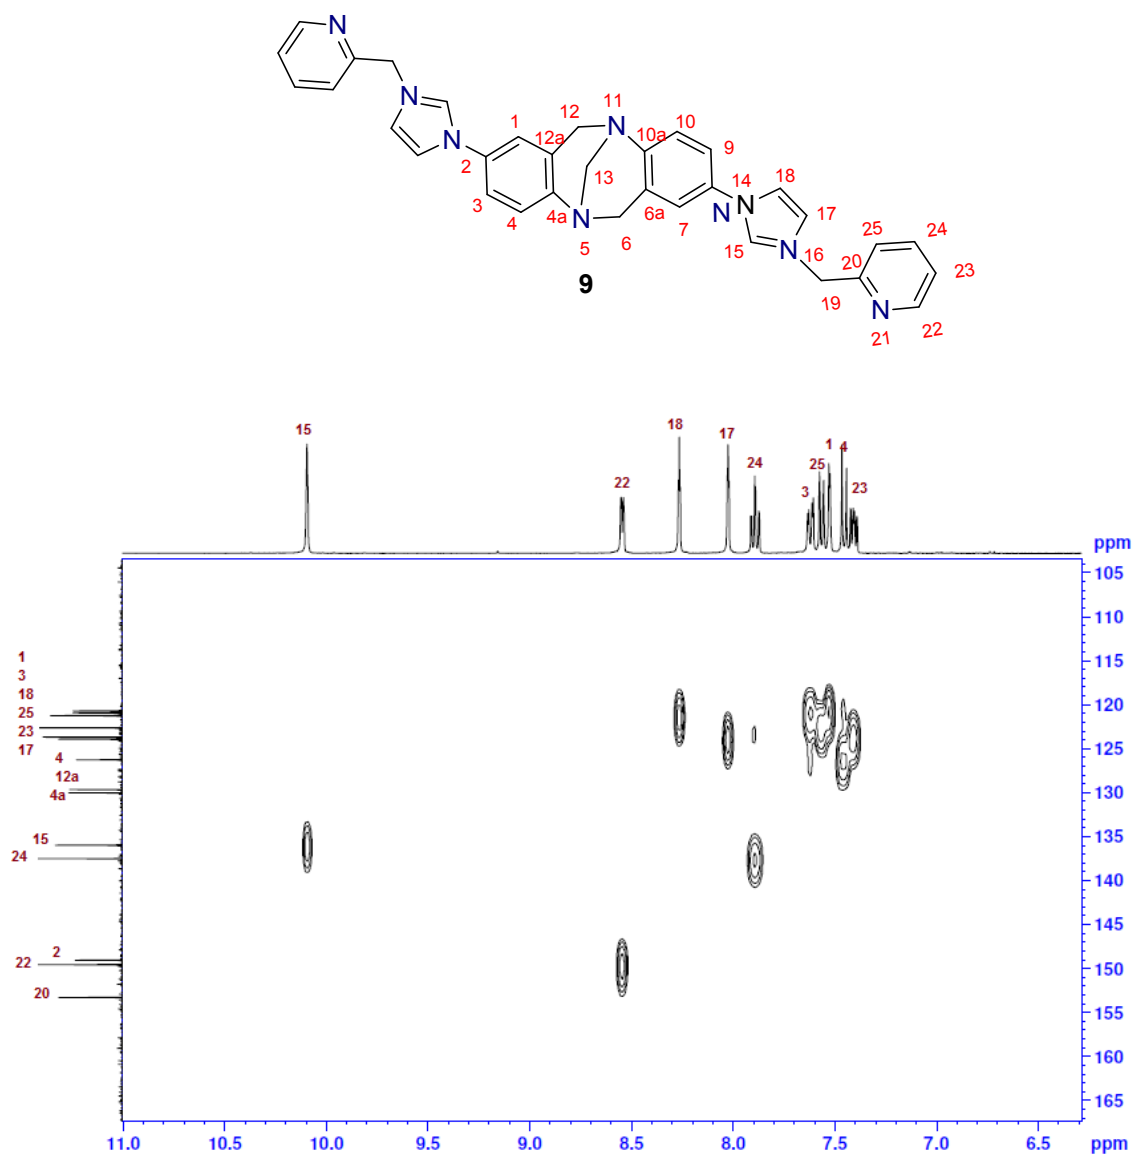

Supporting Information

Figure S56: HSQC of 9 expansion

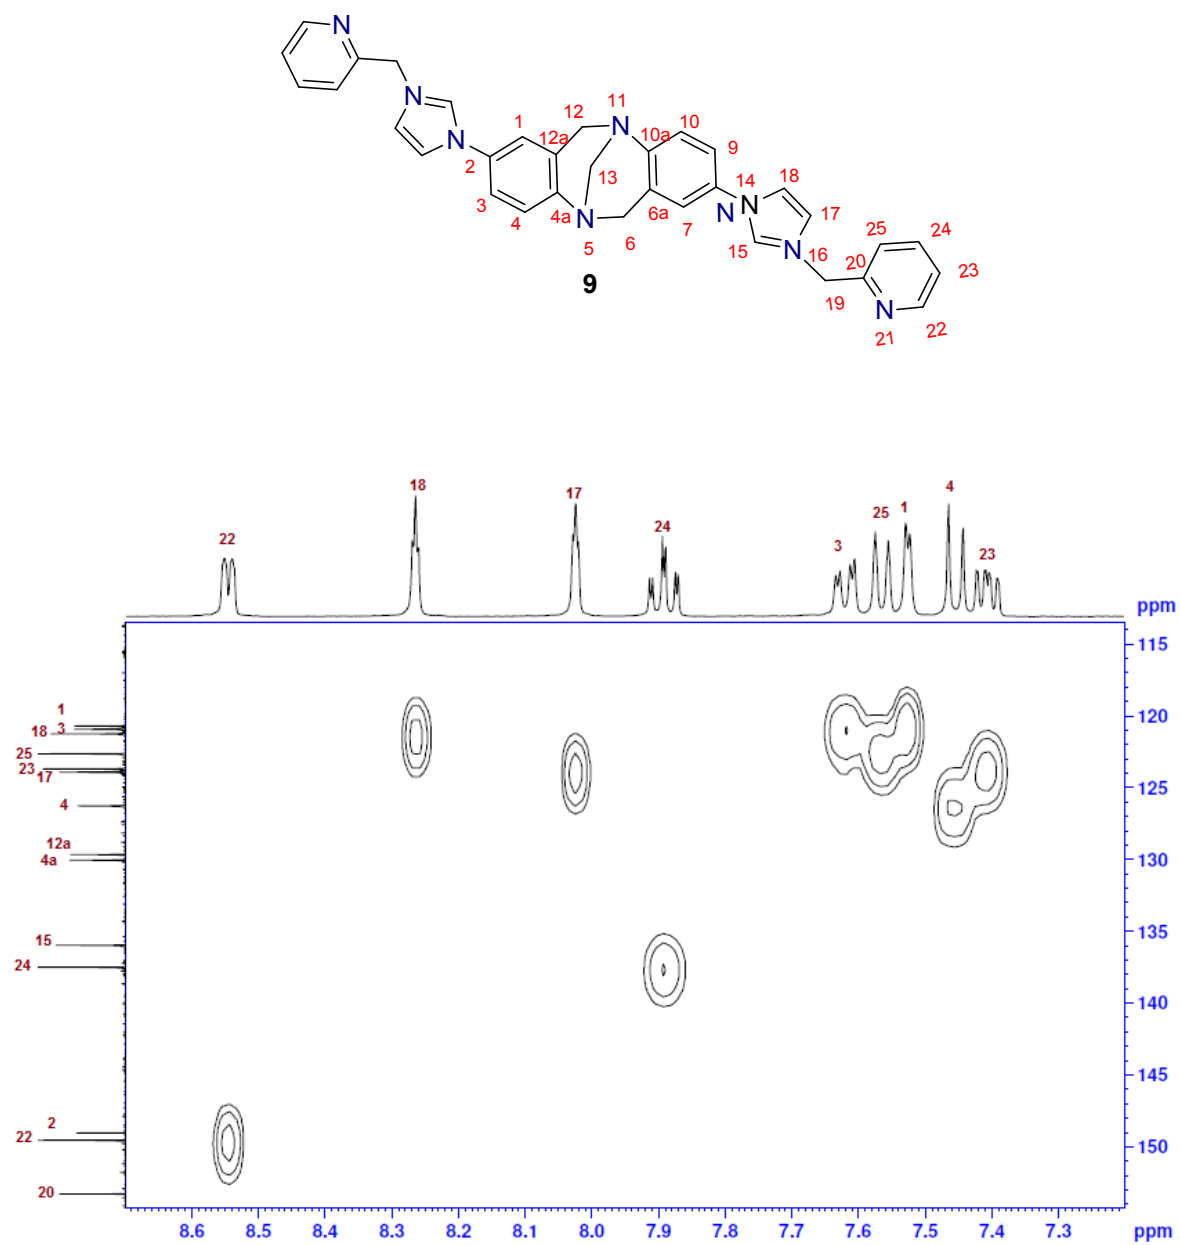



Supporting Information

Figure S57: HMBC of 9 (400 MHz, DMSO-*d*<sub>6</sub>, RT)

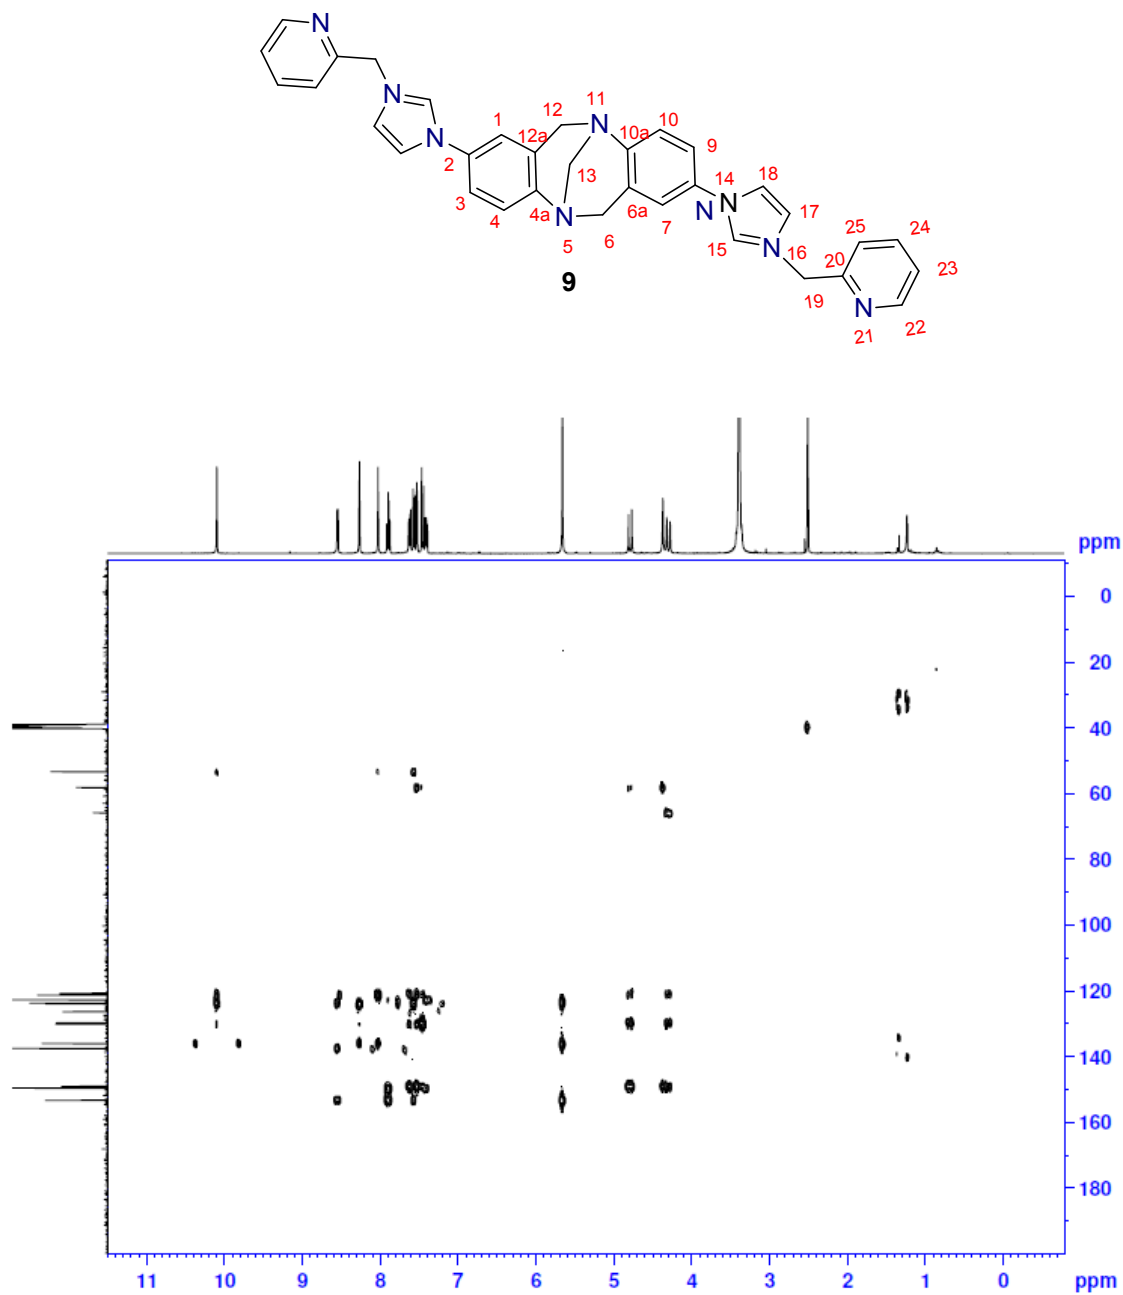

Figure S58: HMBC of 9 expansion

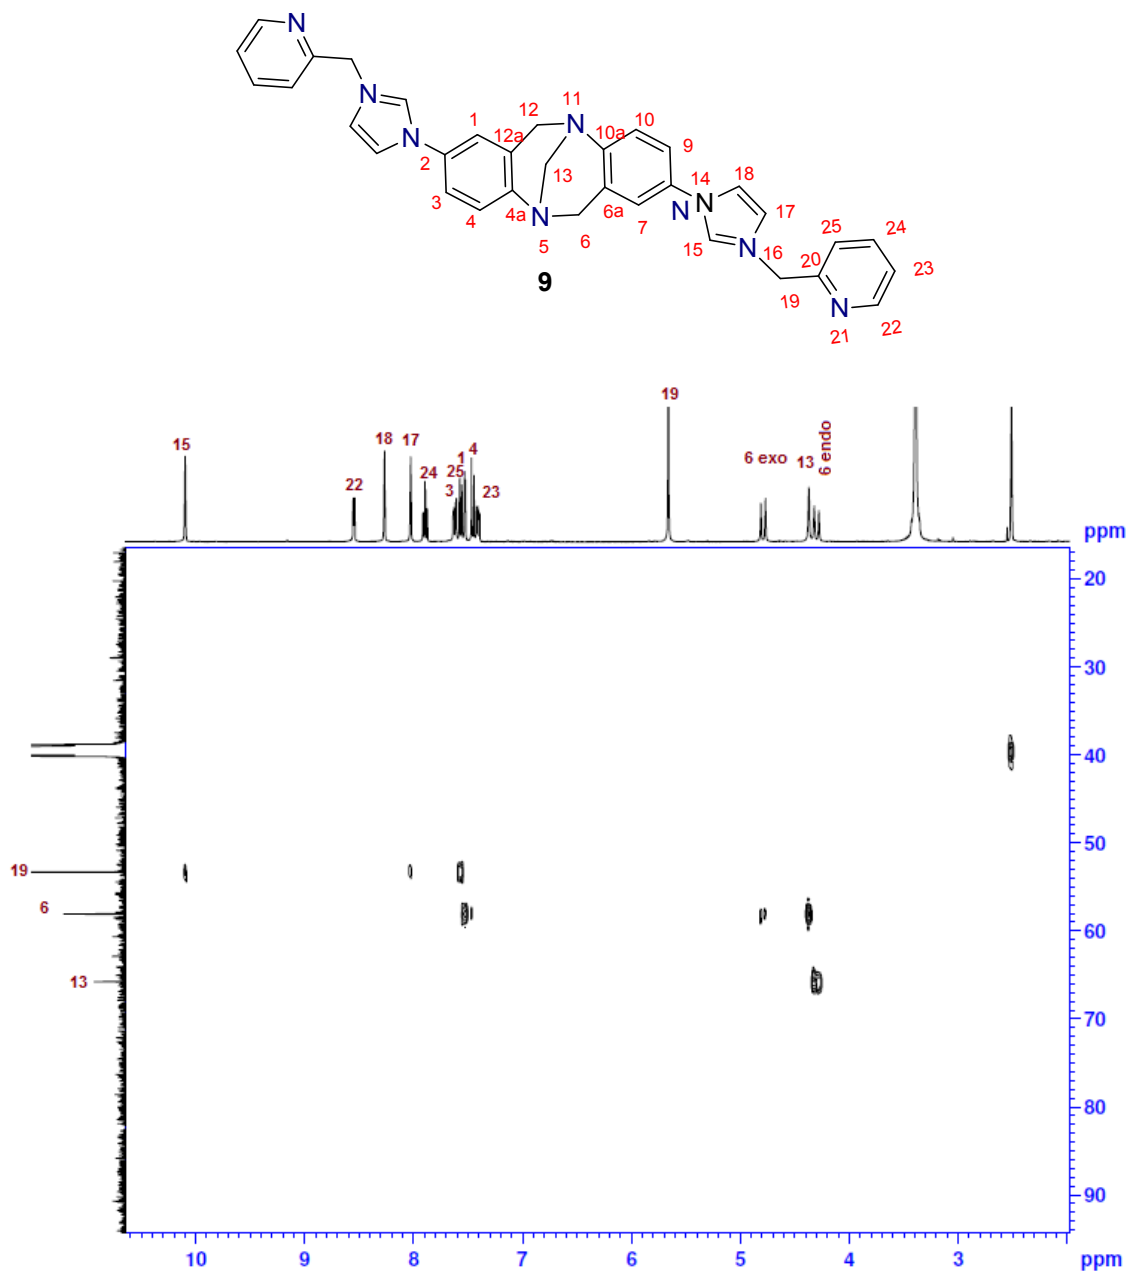

Supporting Information

Figure S59: HMBC of 9 expansion

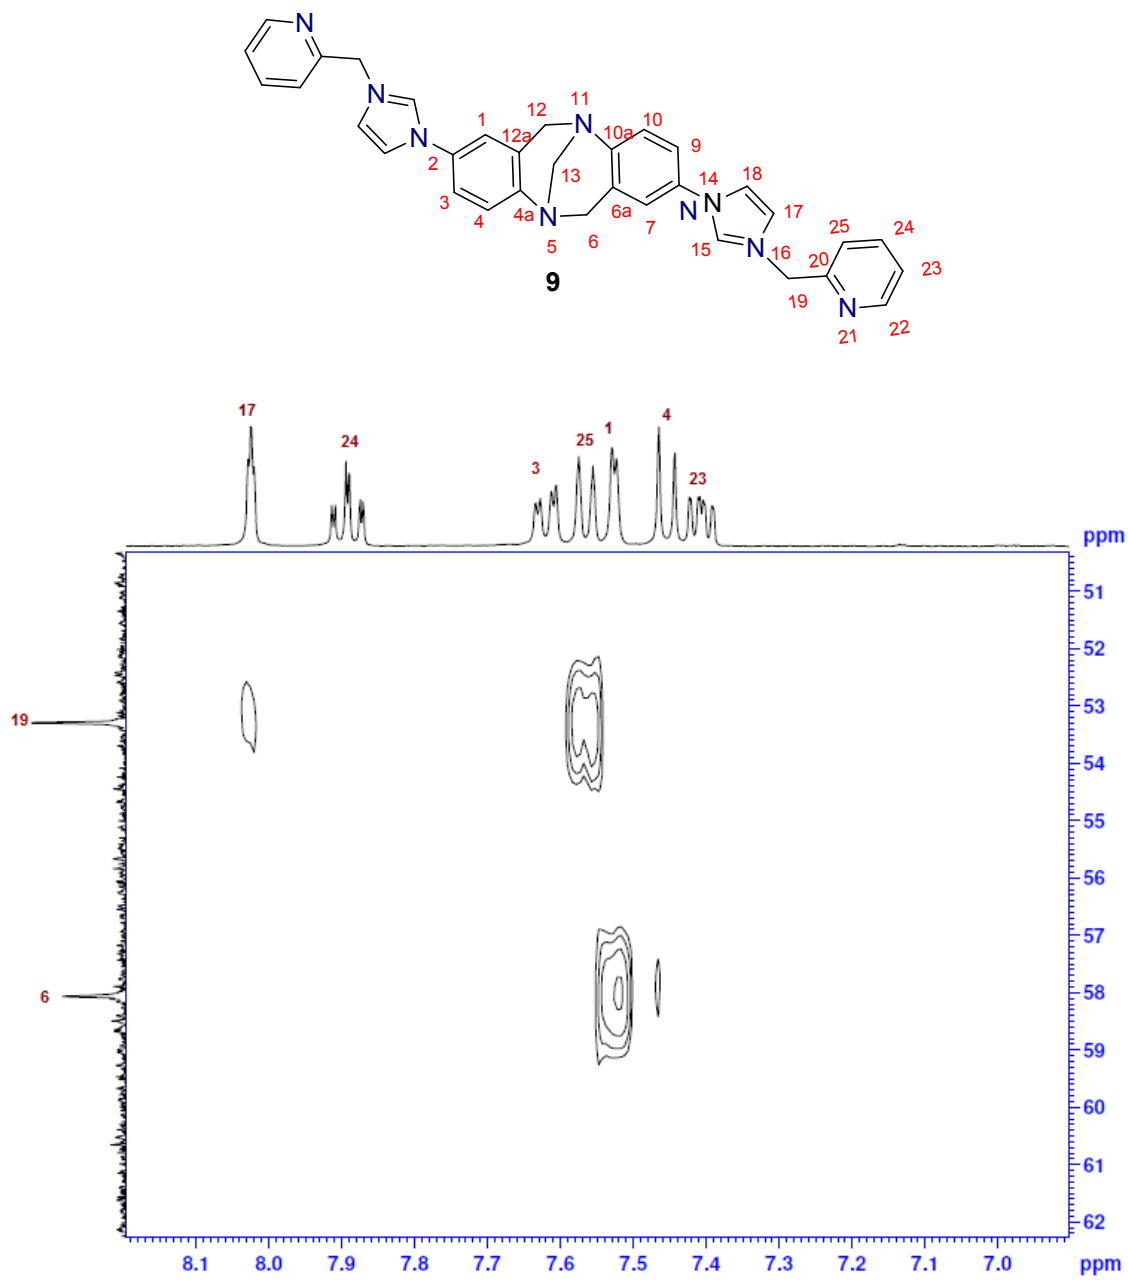

Figure S60: HMBC of 9 expansion

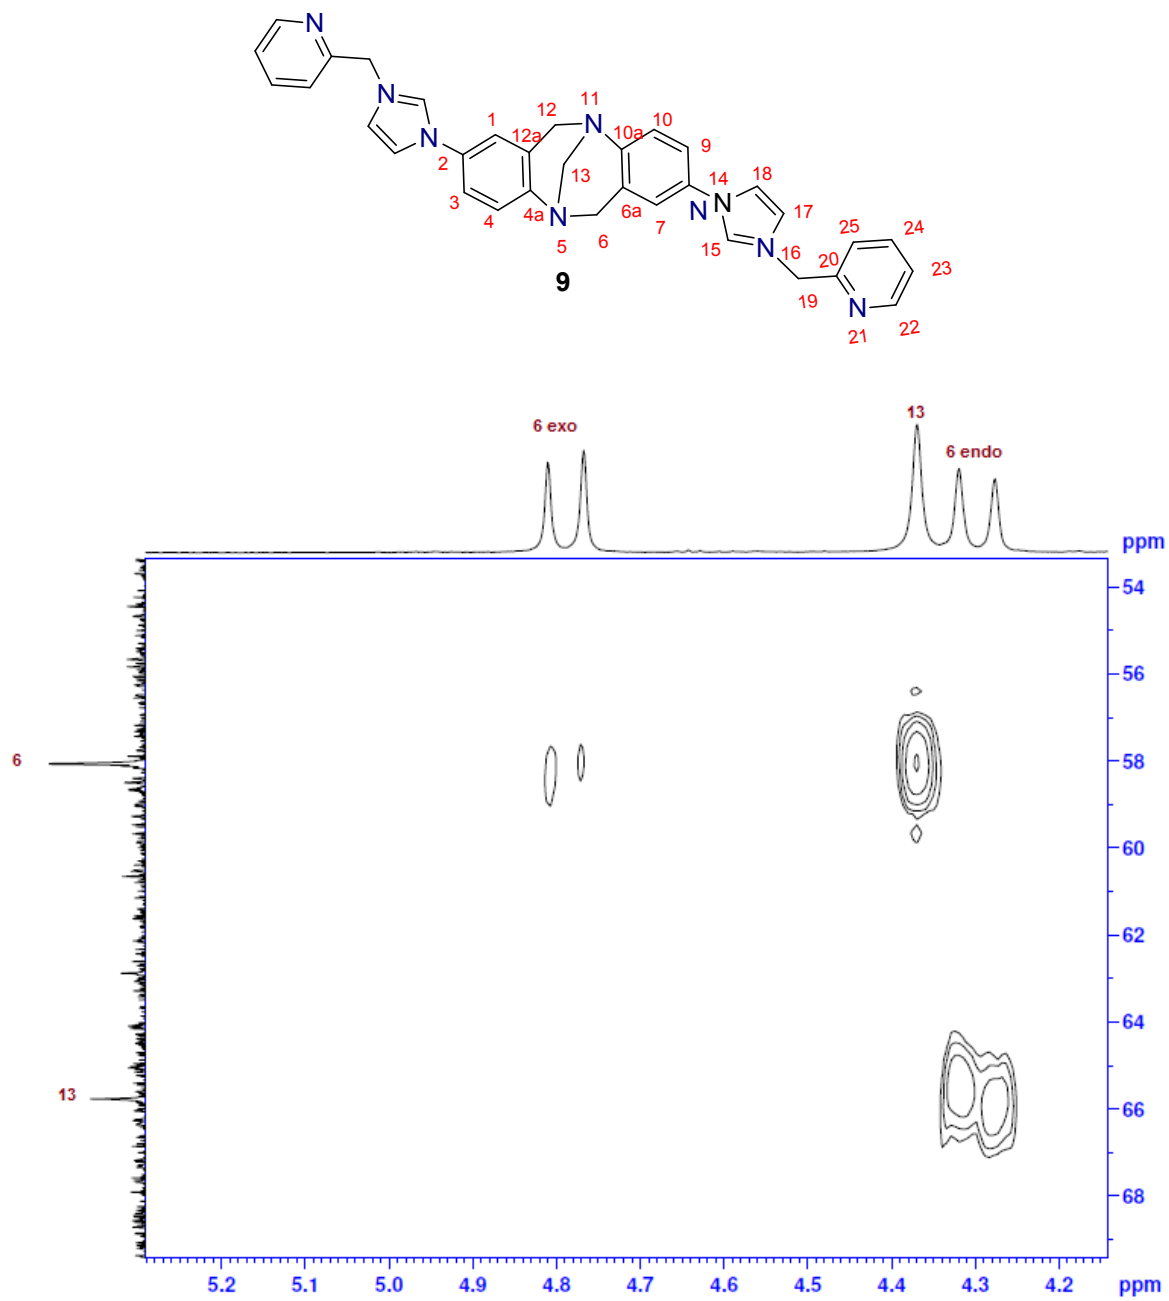

Supporting Information

Figure S61: HMBC of 9 expansion

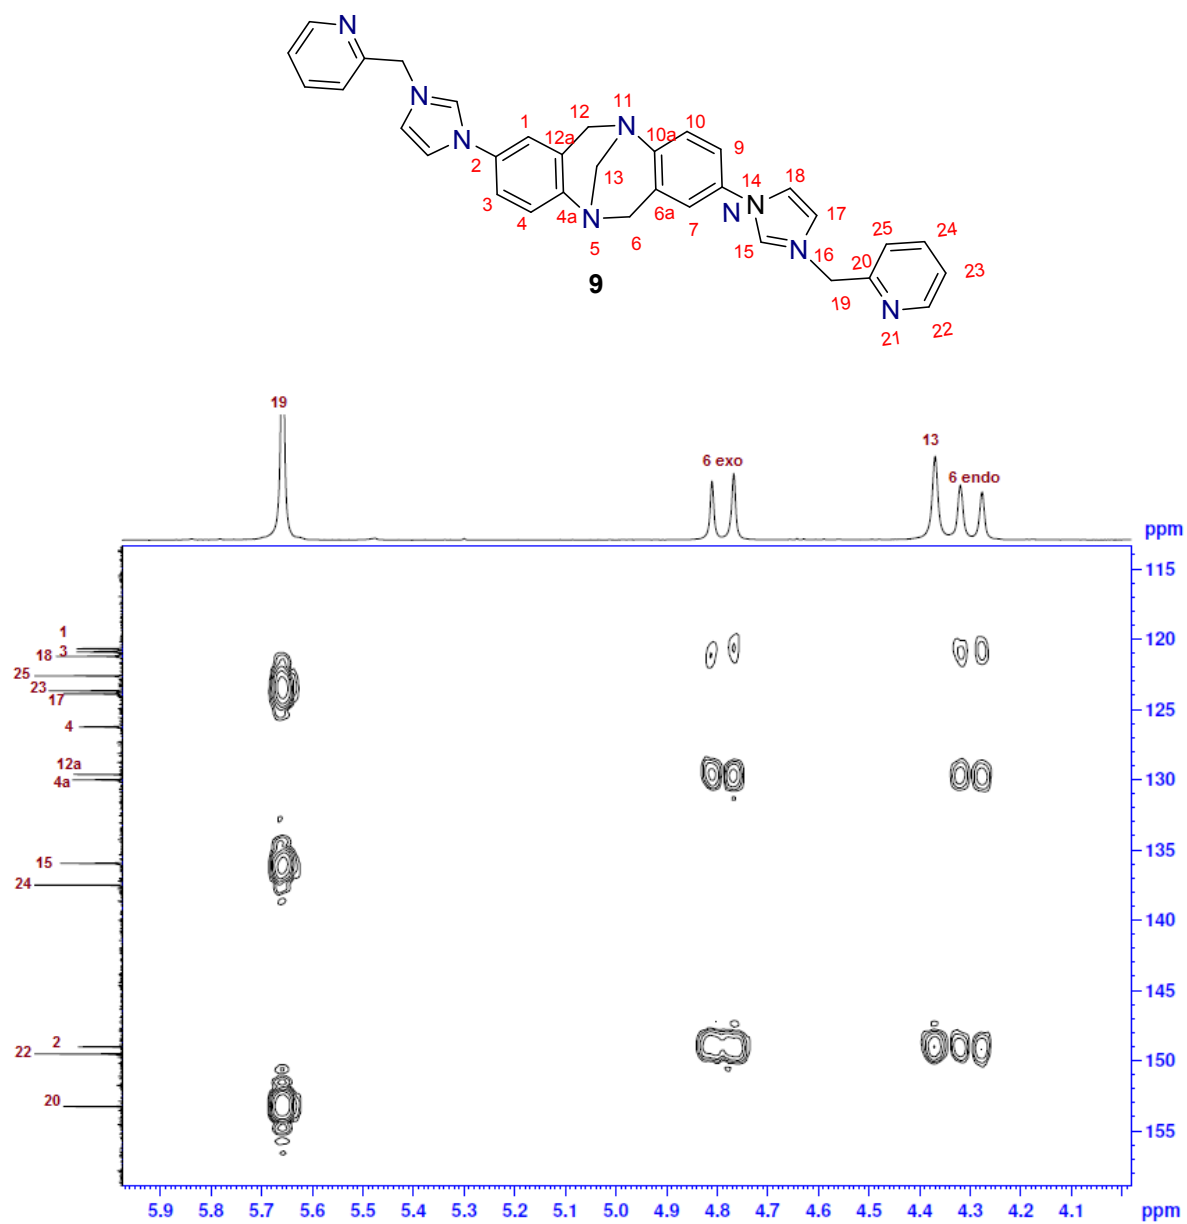

Supporting Information

Figure S62: HMBC of 9 expansion

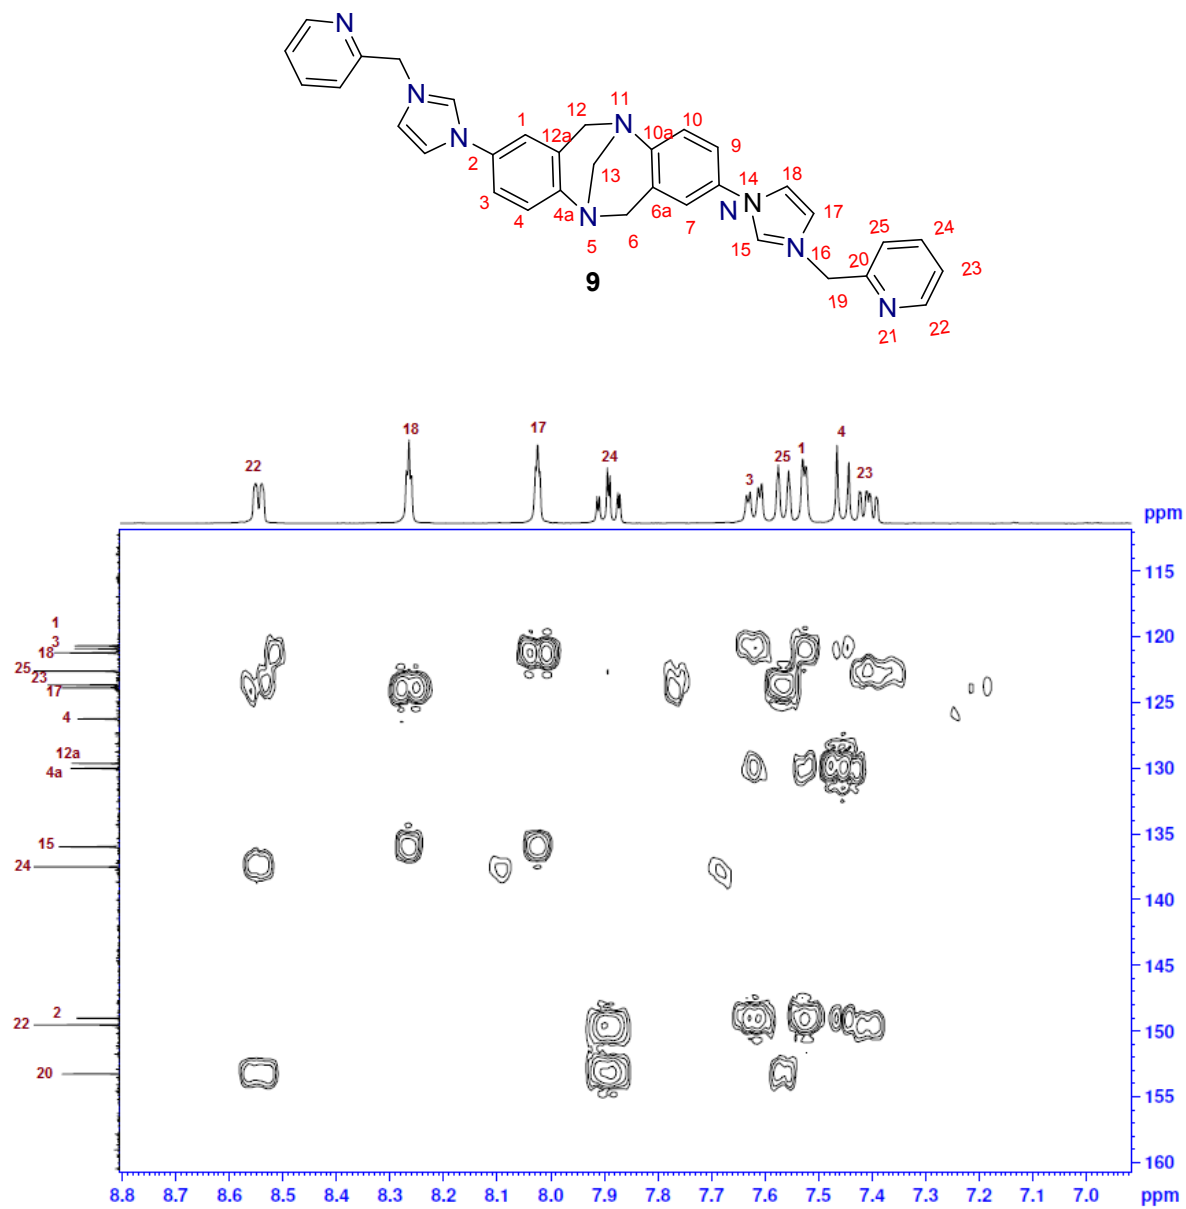

Supporting Information

Figure S63: HMBC of 9 expansion

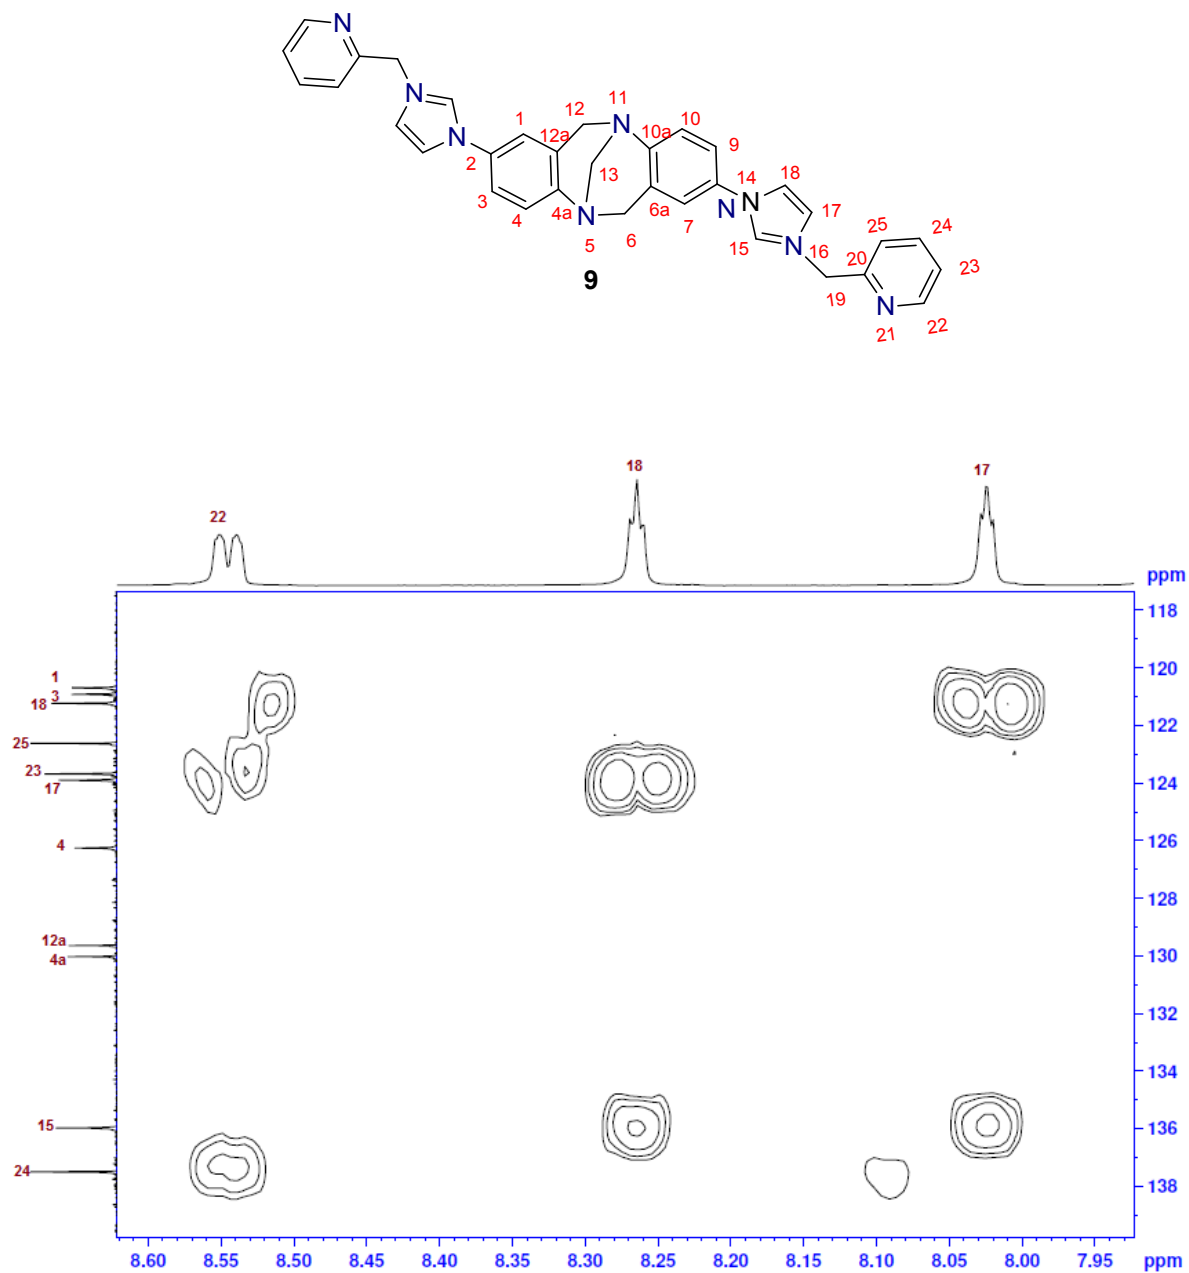

Figure S64: <sup>1</sup>H NMR spectrum (400 MHz, DMSO-*d*<sub>6</sub>, RT) of 10 (type II)

Supporting Information

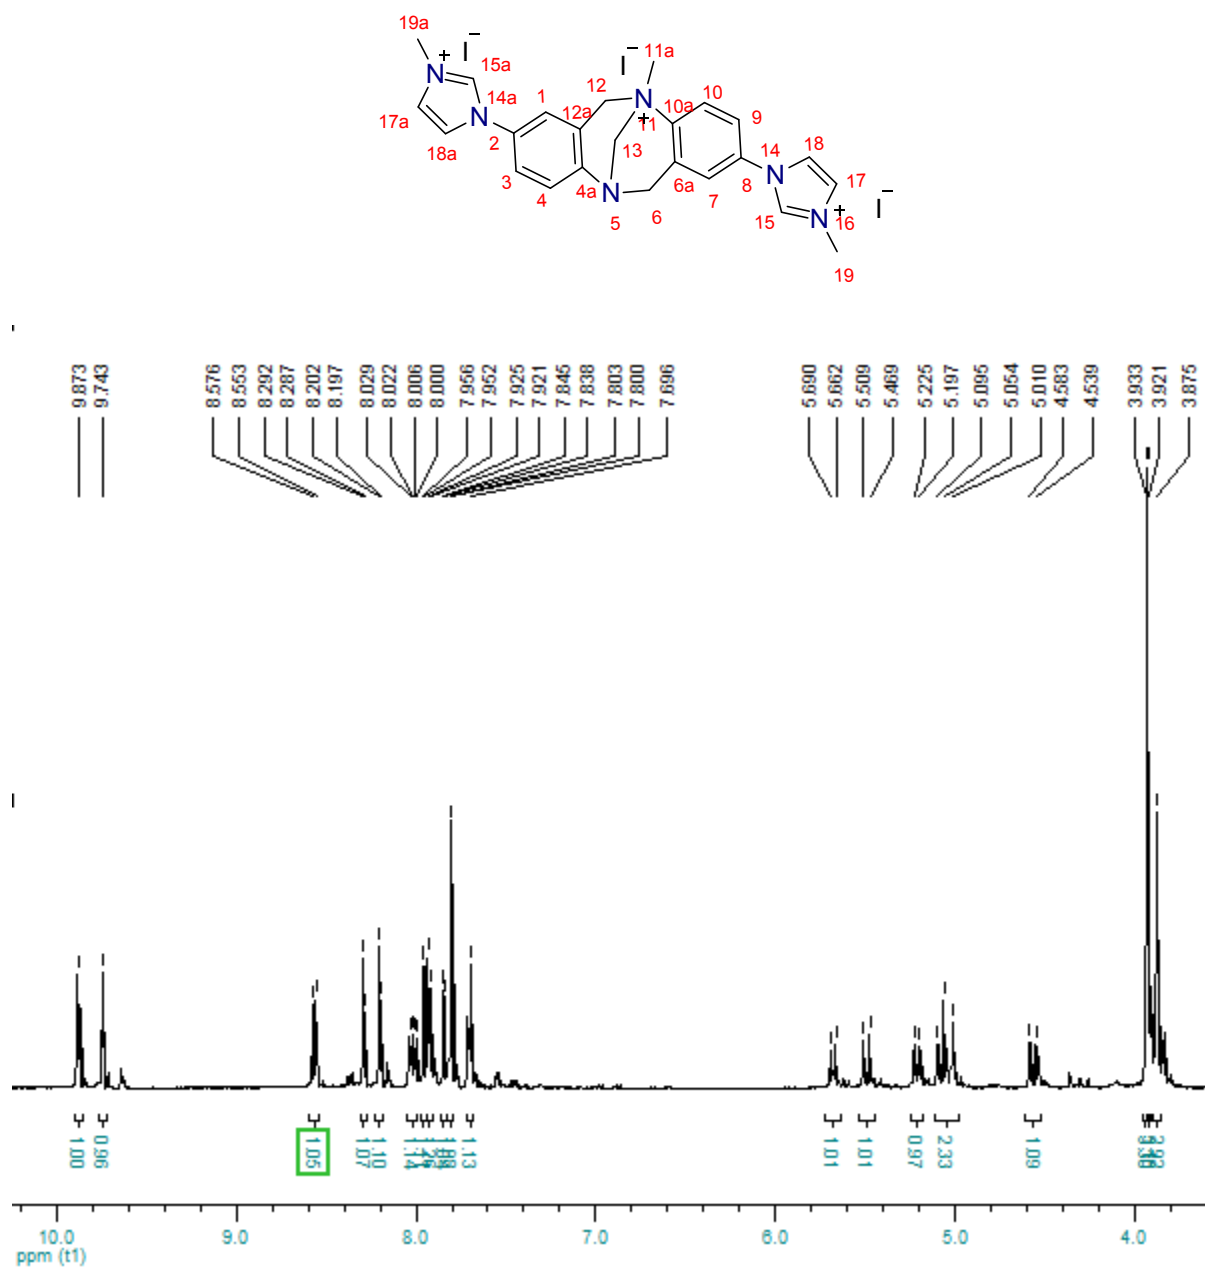

Figure S65:  $^{13}\text{C}$  NMR spectrum (100 MHz,  $\text{DMSO-}d_6$ , RT) of 10 (type II)



## Supporting Information

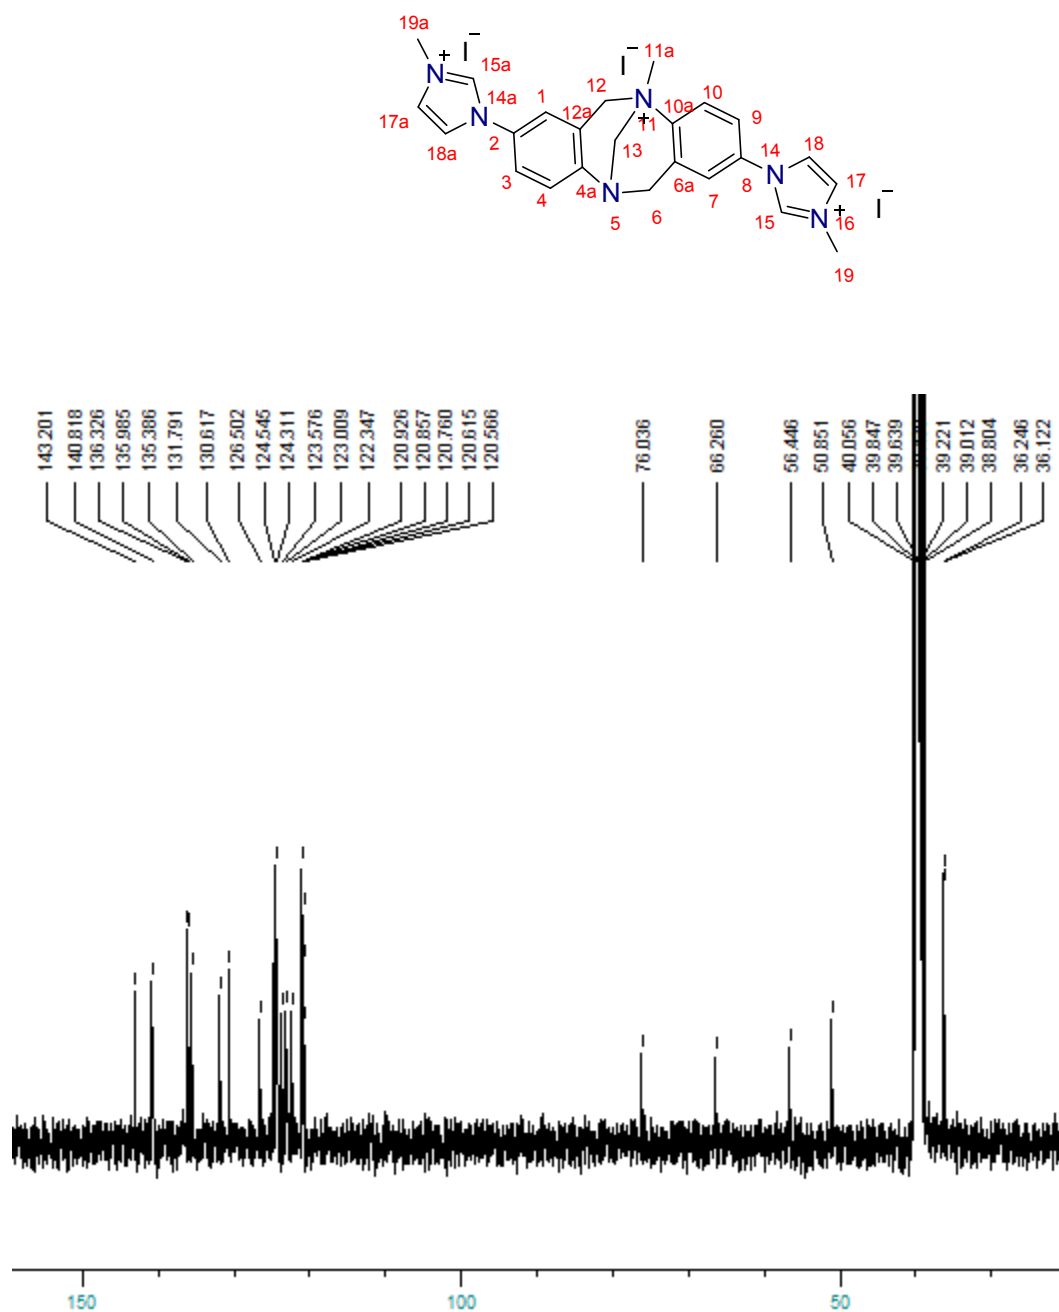

Figure S66: HRM spectrum of 3

## Supporting Information

**Compound Table**

| Compound Label    | RT    | Mass     | Abund | Formula    | Tgt Mass | Diff (ppm) | MFG Formula | DB Formula |
|-------------------|-------|----------|-------|------------|----------|------------|-------------|------------|
| Cpd 1: C21 H18 N6 | 0.118 | 354.1579 | 5098  | C21 H18 N6 | 354.1593 | -3.82      | C21 H18 N6  | C21 H18 N6 |

| Compound Label    | m/z      | RT    | Algorithm       | Mass     |
|-------------------|----------|-------|-----------------|----------|
| Cpd 1: C21 H18 N6 | 377.1472 | 0.118 | Find By Formula | 354.1579 |

**MS Spectrum Peak List**

| m/z      | z | Abund     | Formula  | Ion    |
|----------|---|-----------|----------|--------|
| 355.1651 | 1 | 375616.09 | C21H18N6 | (M+H)+ |
| 356.1686 | 1 | 75762.84  | C21H18N6 | (M+H)+ |
| 357.1716 | 1 | 8268.2    | C21H18N6 | (M+H)+ |

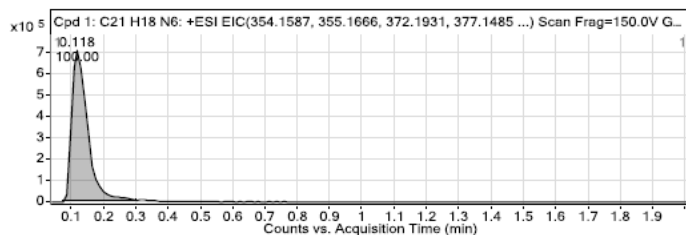

**MS Spectrum**

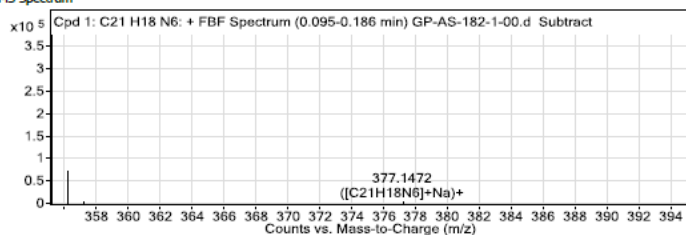

**MS Zoomed Spectrum**

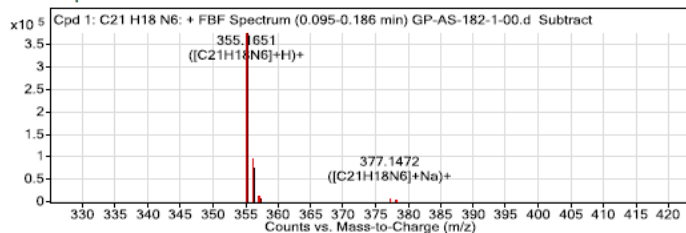

**Figure S67: HRM spectrum of 5**

## Supporting Information

**Compound Table**

| Compound Label      | RT   | Mass     | Abund | Formula      | Tgt Mass | Diff (ppm) | MFG Formula  | DB Formula   |
|---------------------|------|----------|-------|--------------|----------|------------|--------------|--------------|
| Cpd 1: C23 H24 I N6 | 0.14 | 511.1086 | 19428 | C23 H24 I N6 | 511.1107 | -4.14      | C23 H24 I N6 | C23 H24 I N6 |

| Compound Label      | m/z     | RT   | Algorithm       | Mass     |
|---------------------|---------|------|-----------------|----------|
| Cpd 1: C23 H24 I N6 | 511.108 | 0.14 | Find By Formula | 511.1086 |

**MS Spectrum Peak List**

| m/z      | z | Abund    | Formula   | Ion |
|----------|---|----------|-----------|-----|
| 511.108  | 1 | 19428.18 | C23H24IN6 | M+  |
| 512.111  | 1 | 5272.98  | C23H24IN6 | M+  |
| 513.1139 | 1 | 559.64   | C23H24IN6 | M+  |
| 514.1218 | 1 | 22.27    | C23H24IN6 | M+  |

--- End Of Report ---

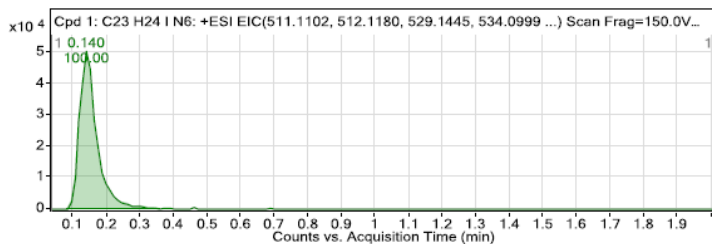

**MS Spectrum**

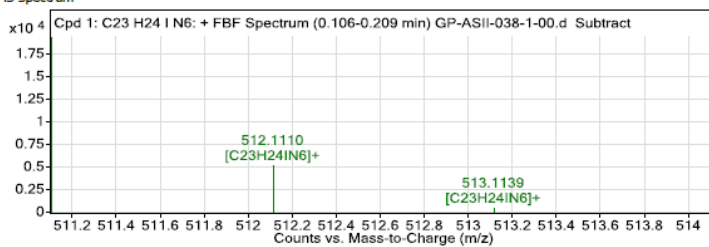

**MS Zoomed Spectrum**

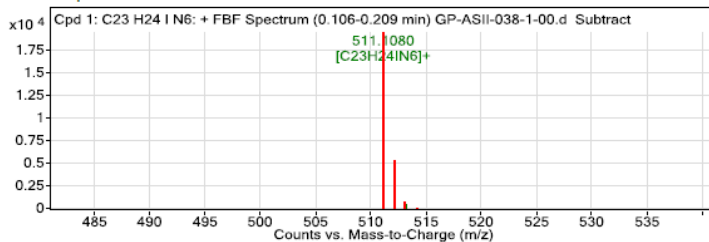

**Figure S68: HRM spectrum of 6**

## Supporting Information

**Compound Table**

| Compound Label      | RT   | Mass     | Abund | Formula      | Tgt Mass | Diff (ppm) | MFG Formula  | DB Formula   |
|---------------------|------|----------|-------|--------------|----------|------------|--------------|--------------|
| Cpd 1: C27 H32 I N6 | 0.12 | 567.1708 | 59875 | C27 H32 I N6 | 567.1733 | -4.35      | C27 H32 I N6 | C27 H32 I N6 |

| Compound Label      | m/z      | RT   | Algorithm       | Mass     |
|---------------------|----------|------|-----------------|----------|
| Cpd 1: C27 H32 I N6 | 567.1703 | 0.12 | Find By Formula | 567.1708 |

**MS Spectrum Peak List**

| m/z      | z | Abund    | Formula   | Ion |
|----------|---|----------|-----------|-----|
| 567.1703 | 1 | 59875.1  | C27H32IN6 | M+  |
| 568.1731 | 1 | 19133.39 | C27H32IN6 | M+  |
| 569.1762 | 1 | 2904.67  | C27H32IN6 | M+  |
| 570.1784 | 1 | 202.14   | C27H32IN6 | M+  |

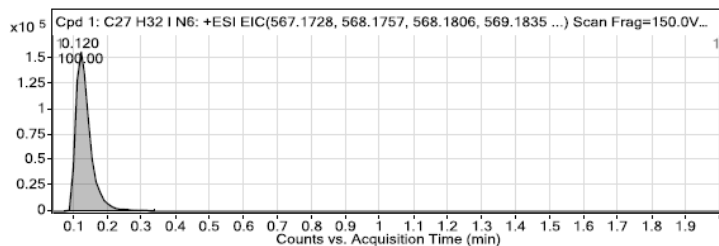

**MS Spectrum**

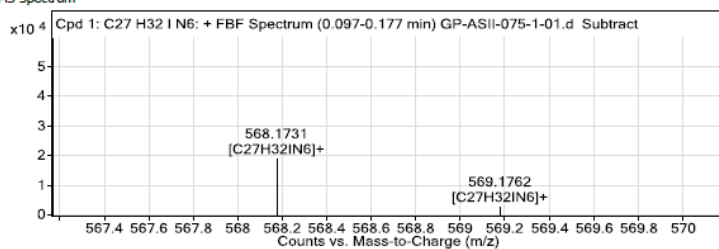

**MS Zoomed Spectrum**

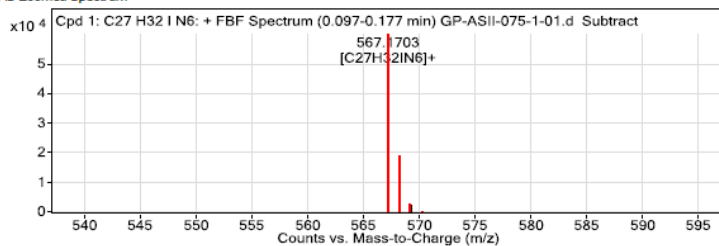

**Figure S69: HRM spectrum of 7**

## Supporting Information

### Compound Table

| Compound Label    | RT    | Mass     | Abund  | Formula    | Tgt Mass | Diff (ppm) | MFG Formula | DB Formula |
|-------------------|-------|----------|--------|------------|----------|------------|-------------|------------|
| Cpd 1: C33 H28 N8 | 0.128 | 536.2413 | 207118 | C33 H28 N8 | 536.2437 | -4.45      | C33 H28 N8  | C33 H28 N8 |

| Compound Label    | m/z      | RT    | Algorithm       | Mass     |
|-------------------|----------|-------|-----------------|----------|
| Cpd 1: C33 H28 N8 | 537.2479 | 0.128 | Find By Formula | 536.2413 |

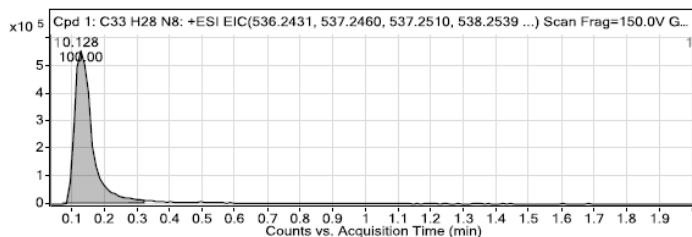

### MS Spectrum Peak List

| m/z      | z | Abund     | Formula  | Ion                |
|----------|---|-----------|----------|--------------------|
| 537.2479 | 1 | 207117.88 | C33H28N8 | (M+H) <sup>+</sup> |
| 538.2514 | 1 | 69668.34  | C33H28N8 | (M+H) <sup>+</sup> |
| 539.2543 | 1 | 12869.21  | C33H28N8 | (M+H) <sup>+</sup> |
| 540.2571 | 1 | 1610.24   | C33H28N8 | (M+H) <sup>+</sup> |
| 575.2236 | 1 | 5224.53   | C33H28N8 | (M+K) <sup>+</sup> |
| 576.2249 | 1 | 1874.42   | C33H28N8 | (M+K) <sup>+</sup> |
| 577.229  | 1 | 291.32    | C33H28N8 | (M+K) <sup>+</sup> |
| 578.241  | 1 | 36.66     | C33H28N8 | (M+K) <sup>+</sup> |

### MS Spectrum

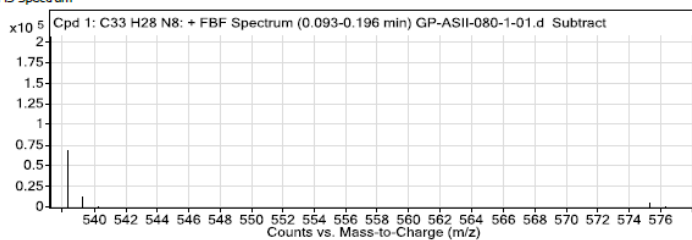

### MS Zoomed Spectrum

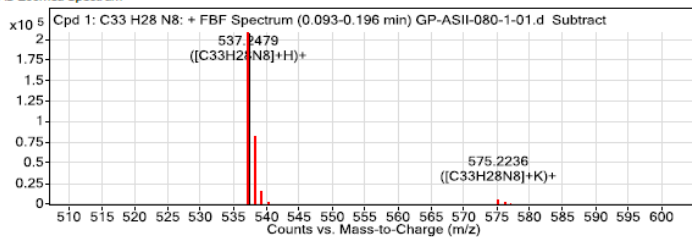

**Figure S70: HRM spectrum of 8**

## Supporting Information

Compound Table

| Compound Label      | RT    | Mass     | Abund  | Formula      | Tgt Mass | Diff (ppm) | MFG Formula  | DB Formula   |
|---------------------|-------|----------|--------|--------------|----------|------------|--------------|--------------|
| Cpd 1: C27 H32 I N6 | 0.152 | 567.1708 | 140445 | C27 H32 I N6 | 567.1733 | -4.49      | C27 H32 I N6 | C27 H32 I N6 |

| Compound Label      | m/z      | RT    | Algorithm       | Mass     |
|---------------------|----------|-------|-----------------|----------|
| Cpd 1: C27 H32 I N6 | 567.1702 | 0.152 | Find By Formula | 567.1708 |

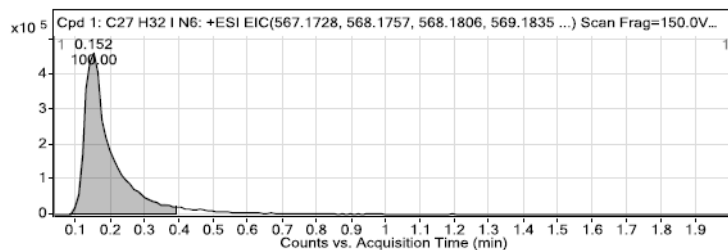

MS Spectrum Peak List

| m/z      | z | Abund    | Formula   | Ion |
|----------|---|----------|-----------|-----|
| 567.1702 | 1 | 140444.5 | C27H32IN6 | M+  |
| 568.1733 | 1 | 38573.97 | C27H32IN6 | M+  |
| 569.1766 | 1 | 6100.02  | C27H32IN6 | M+  |
| 570.1791 | 1 | 623.26   | C27H32IN6 | M+  |

MS Spectrum

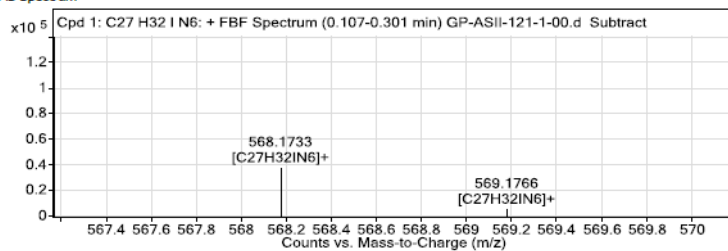

MS Zoomed Spectrum

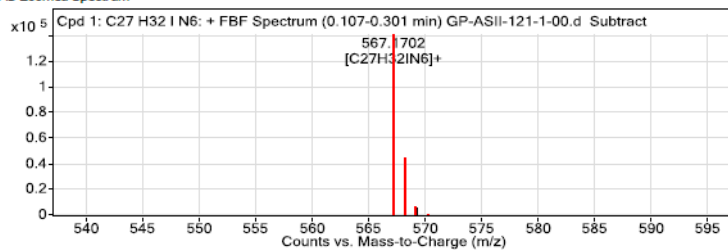

Figure S71: HRM spectrum of 9

## Supporting Information

Compound Table

| Compound Label    | RT    | Mass     | Abund | Formula    | Tgt Mass | Diff (ppm) | MFG Formula | DB Formula |
|-------------------|-------|----------|-------|------------|----------|------------|-------------|------------|
| Cpd 1: C33 H28 N8 | 0.165 | 536.2411 | 1975  | C33 H28 N8 | 536.2437 | -4.88      | C33 H28 N8  | C33 H28 N8 |

| Compound Label    | m/z      | RT    | Algorithm       | Mass     |
|-------------------|----------|-------|-----------------|----------|
| Cpd 1: C33 H28 N8 | 537.2485 | 0.165 | Find By Formula | 536.2411 |

MS Spectrum Peak List

| m/z      | z | Abund   | Formula  | Ion      |
|----------|---|---------|----------|----------|
| 537.2485 | 1 | 1975.08 | C33H28N8 | (M+H)+   |
| 538.252  | 1 | 894.58  | C33H28N8 | (M+H)+   |
| 539.2535 | 1 | 221.35  | C33H28N8 | (M+H)+   |
| 554.2545 | 1 | 81.82   | C33H28N8 | (M+NH4)+ |
| 575.2181 | 1 | 64.73   | C33H28N8 | (M+K)+   |

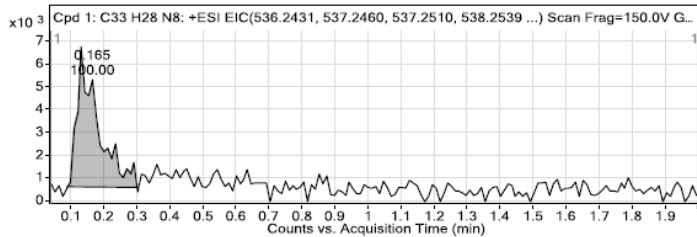

MS Spectrum

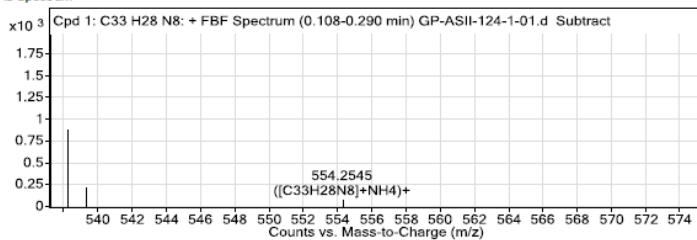

MS Zoomed Spectrum

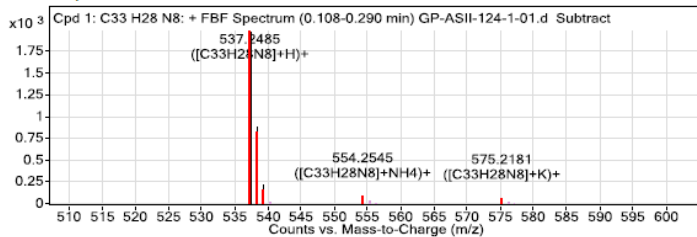

Supporting Information

Table S1: Known 4,10-dihalogen and imidazole substituted methano dibenzo-diazocines.

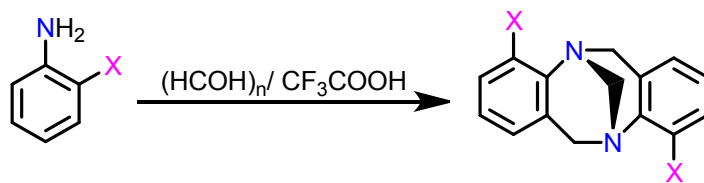

| Entry | X         | Yield%         | Reference        |
|-------|-----------|----------------|------------------|
| 1     | F         | 27             | [1]              |
| 2     | Cl        | 19             | [1]              |
| 3     | Br        | 9,10           | [1]              |
| 4     | I         | 6 <sup>a</sup> | [3]              |
| 5     | Imidazole | 79%            | <b>This work</b> |

a) Isolated an impure product



Supporting Information

Table S2: Known 4,10-di substituted methano dibenzo-diazocines with substituents at 2,8-positions.

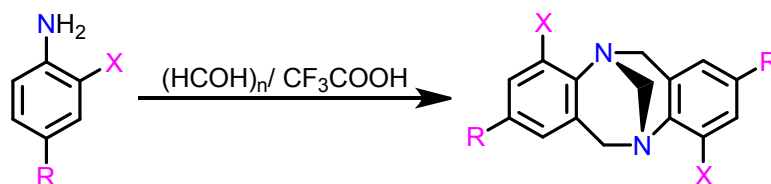

| Entry | R                     | X                     | Yield%     | Reference       |
|-------|-----------------------|-----------------------|------------|-----------------|
| 1     | Me                    | Br                    | 85, 98     | [1]<br>[5]      |
| 2     | Me                    | Cl                    | 77         | [1]             |
| 3     | Me                    | F                     | 75         | [1]             |
| 4     | Me                    | I                     | 30         | [1]             |
| 5     | Bu'                   | Br                    | 30         | [6]             |
| 6     | Me                    | NO <sub>2</sub>       | 36         | [2]             |
| 7     | OMe                   | CO <sub>2</sub> Hexyl | 16         | [7]             |
| 8     | Me                    | CO <sub>2</sub> Hexyl | 16         | [7]             |
| 9     | Br                    | Br                    | 33, 60, 72 | [8]<br>[9], [4] |
| 10    | Br                    | Cl                    | 86         | [4]             |
| 11    | CF <sub>3</sub>       | CF <sub>3</sub>       | 5          | [6]             |
| 12    | CO <sub>2</sub> Et    | Br                    | 48         | [7]             |
| 13    | CO <sub>2</sub> Hexyl | Br                    | 88         | [7]             |
| 14    | NO <sub>2</sub>       | Br                    | 28         | [2]             |

Supporting Information

Table S3: NMR comparison of 4,10-dihalo Träger's base analogues with 3.

|                 | <i>No.</i>        | <i>1/7</i> | <i>2/8</i> | <i>3/9</i> | <i>4/10</i> | <i>4a/10a</i> | <i>6/12</i> | <i>6/12</i> | <i>13</i> | <i>6a/12a</i> |
|-----------------|-------------------|------------|------------|------------|-------------|---------------|-------------|-------------|-----------|---------------|
|                 | <i>X</i>          |            |            |            |             |               | <i>endo</i> | <i>exo</i>  |           |               |
| <sup>1</sup> H  | Br <sup>(a)</sup> | 6.91-      | 6.91-      | 7.46       | -           | -             | 4.37        | 4.62        | 4.39      | -             |
| NMR             |                   | 6.96       | 6.96       | (d,d)      |             |               | 9(d)        | (d)         | (s)       |               |
|                 |                   | (m)        | (m)        | J=6.7,     |             |               | J=17.3      | J=17.3      |           |               |
|                 |                   |            |            | 2.6 Hz     |             |               | Hz          | Hz          |           |               |
|                 | Cl <sup>(a)</sup> | 6.90       | 6.99       | 7.27       | -           | -             | 4.35        | 4.63        | 4.38      | -             |
|                 |                   | (d,d)      | (t)        | (d,d)      |             |               | (d)         | (d)         | (s)       |               |
|                 |                   | J=7.7,     | J=7.7      | J=7.7,     |             |               | J=17.6      | J=17.6      |           |               |
|                 |                   | 0.8 Hz     | Hz         | 0.8 Hz     |             |               | Hz          | Hz          |           |               |
|                 | F <sup>(a)</sup>  | 6.76       | 6.90-      | 6.90-      | -           | -             | 4.23        | 4.63        | 4.32      | -             |
|                 |                   | (d)        | 7.00       | 7.00       |             |               | (d)         | (d)         | (s)       |               |
|                 |                   | J=7.3      | (m)        |            |             |               | J=17.1      | J=17.1      |           |               |
|                 |                   | Hz         |            |            |             |               | Hz          | Hz          |           |               |
|                 | Im <sup>(b)</sup> | 6.82       | 7.09       | 7.04       | -           | -             | 3.33        | 4.26        | 4.32      | -             |
|                 |                   | (d)        | (d)        | (t)        |             |               | (d)         | (d)         | (s)       |               |
|                 |                   | J=7.6      | J=7.6      | J=7.6      |             |               | J=17.2      | J=17.2      |           |               |
|                 |                   | Hz         | Hz         | Hz         |             |               | Hz          |             |           |               |
| <sup>13</sup> C | Br <sup>(a)</sup> | 126.47     | 125.76     | 131.69     | 120.27      | 144.92        | 55.6        |             | 67.72     | 131.06        |
| NMR             | Cl <sup>(a)</sup> | 125.79     | 125.10     | 128.49     | 129.45      | 143.67        | 54.97       |             | 67.69     | 130.59        |
|                 | F <sup>(a)</sup>  | 122.54     | 124.54     | 114.06     | 156.32      | 145.23        | 55.38       |             | 67.42     | 130.30        |
|                 | Im <sup>(b)</sup> | 126.80     | 123.77     | 124.50     | 129.59      | 131.59        | 54.18       |             | 66.79     | 140.94        |

a) Listed spectral values are taken from: A. Hansson, J. Jensen, O. F. Wendt and K. Wärnmark, Eur. J. Org. Chem., 2003, 3179.

b) Present work.

**Supporting Information**

**Table S4. Crystallographic data, details of data collection and structure refinement parameters for compounds 3-7.**

| parameters                                  | <b>3a</b>                                                           | <b>3b</b>                                           | <b>4</b>                        | <b>5</b>                                                      | <b>6</b>                                                           | <b>7</b>                                                            |
|---------------------------------------------|---------------------------------------------------------------------|-----------------------------------------------------|---------------------------------|---------------------------------------------------------------|--------------------------------------------------------------------|---------------------------------------------------------------------|
| Empirical formula                           | C <sub>5.25</sub> H <sub>5</sub> N <sub>1.5</sub> O <sub>0.25</sub> | C <sub>5.25</sub> H <sub>4.5</sub> N <sub>1.5</sub> | C <sub>21</sub> HN <sub>6</sub> | C <sub>23</sub> H <sub>24</sub> I <sub>2</sub> N <sub>6</sub> | C <sub>6.75</sub> H <sub>8</sub> N <sub>1.5</sub> I <sub>0.5</sub> | C <sub>16.5</sub> H <sub>15</sub> N <sub>4</sub> ClO <sub>0.5</sub> |
| Formula weight                              | 372.43                                                              | 372.43                                              | 354.42                          | 638.30                                                        | 694.40                                                             | 625.56                                                              |
| Temperature/K                               | 150                                                                 | 150                                                 | 150                             | 298                                                           | 150                                                                | 150                                                                 |
| Crystal system                              | monoclinic                                                          | monoclinic                                          | monoclinic                      | monoclinic                                                    | monoclinic                                                         | triclinic                                                           |
| Space group                                 | P2 <sub>1</sub> /c                                                  | P2 <sub>1</sub> /c                                  | C2/c                            | P2 <sub>1</sub> /c                                            | C2/c                                                               | Pī                                                                  |
| a/Å                                         | 12.8104(4)                                                          | 12.9360(5)                                          | 25.140(4)                       | 10.9300(2)                                                    | 10.1807(5)                                                         | 8.3442(10)                                                          |
| b/Å                                         | 9.7998(2)                                                           | 9.8962(3)                                           | 5.5409(5)                       | 16.8443(3)                                                    | 13.9648(7)                                                         | 12.5633(12)                                                         |
| c/Å                                         | 15.3326(4)                                                          | 15.4643(5)                                          | 13.9897(17)                     | 14.0472(3)                                                    | 20.5397(9)                                                         | 15.0779(16)                                                         |
| α/°                                         | 90                                                                  | 90                                                  | 90                              | 90                                                            | 90                                                                 | 84.154(8)                                                           |
| β/°                                         | 113.436(3)                                                          | 113.922(4)                                          | 122.157(19)                     | 107.695(3)                                                    | 101.629(5)                                                         | 79.178(10)                                                          |
| γ/°                                         | 90                                                                  | 90                                                  | 90                              | 90                                                            | 90                                                                 | 87.113(9)                                                           |
| Volume/Å <sup>3</sup>                       | 1766.04(9)                                                          | 1809.63(12)                                         | 1649.8(5)                       | 2463.83(10)                                                   | 2860.2(2)                                                          | 1543.7(3)                                                           |
| Z                                           | 4                                                                   | 4                                                   | 4                               | 4                                                             | 4                                                                  | 2                                                                   |
| ρ <sub>calc</sub> /mg/mm <sup>3</sup>       | 1.4006                                                              | 1.3669                                              | 1.4268                          | 1.7206                                                        | 1.6125                                                             | 1.3458                                                              |
| μ/mm <sup>-1</sup>                          | 0.734                                                               | 0.717                                               | 0.712                           | 20.220                                                        | 17.468                                                             | 2.223                                                               |
| F(000)                                      | 786.4                                                               | 786.4                                               | 746.2                           | 1242.1                                                        | 1370.3                                                             | 655.2                                                               |
| 2θ range for data collection                | 6.28 to 141.42°                                                     | 7.48 to 141.58°                                     | 8.3 to 140.76°                  | 6.6 to 141.54°                                                | 8.8 to 141.38°                                                     | 7.08 to 142.48°                                                     |
| Reflections collected                       | 6629                                                                | 7054                                                | 2878                            | 10257                                                         | 5536                                                               | 8560                                                                |
| Independent reflections                     | 3321[R(int) = 0.0257]                                               | 3405[R(int) = 0.0225]                               | 1547[R(int) = 0.0269]           | 4654[R(int) = 0.0464]                                         | 2707[R(int) = 0.0341]                                              | 5183[R(int) = 0.0338]                                               |
| Data/restraints/parameters                  | 3321/0/263                                                          | 3405/0/253                                          | 1547/0/122                      | 4654/0/282                                                    | 2707/0/162                                                         | 5183/0/401                                                          |
| Goodness-of-fit on F <sup>2</sup>           | 1.053                                                               | 1.044                                               | 1.040                           | 1.045                                                         | 1.021                                                              | 1.090                                                               |
| Largest diff. peak/hole / e Å <sup>-3</sup> | 0.26/-0.27                                                          | 0.70/-0.65                                          | 0.23/-0.30                      | 1.40/-2.08                                                    | 0.71/-0.76                                                         | 0.54/-0.51                                                          |

**Supporting Information**

|                                            |                                    |                                    |                                    |                                    |                                    |                                    |
|--------------------------------------------|------------------------------------|------------------------------------|------------------------------------|------------------------------------|------------------------------------|------------------------------------|
| Final R indexes [ $I \geq 2\sigma$<br>(I)] | $R_1 = 0.0400,$<br>$wR_2 = 0.1079$ | $R_1 = 0.0578,$<br>$wR_2 = 0.1571$ | $R_1 = 0.0410,$<br>$wR_2 = 0.1152$ | $R_1 = 0.0520,$<br>$wR_2 = 0.1422$ | $R_1 = 0.0325,$<br>$wR_2 = 0.0838$ | $R_1 = 0.0723,$<br>$wR_2 = 0.2241$ |
|--------------------------------------------|------------------------------------|------------------------------------|------------------------------------|------------------------------------|------------------------------------|------------------------------------|

---

**Supporting Information**

**Table S5. The bond distances and angles comparison of 3-7.**

|                                                | <b>3a</b>  | <b>3b</b>  | <b>4</b>   | <b>5</b>   | <b>6</b> | <b>7</b> |
|------------------------------------------------|------------|------------|------------|------------|----------|----------|
| Bond lengths (Å)                               |            |            |            |            |          |          |
| N <sub>a</sub> -C <sub>a</sub>                 | 1.471(17)  | 1.471(2)   | 1.467(18)  | 1.461(7)   | 1.473(4) | 1.471(6) |
| N <sub>b</sub> -C <sub>a</sub>                 | 1.464(17)  | 1.463(3)   | 1.467(18)  | 1.469(7)   | 1.473(4) | 1.461(7) |
| Bond angles (°)                                |            |            |            |            |          |          |
| N <sub>a</sub> -C <sub>a</sub> -N <sub>b</sub> | 111.90(11) | 112.00(16) | 111.45(18) | 111.6(4)   | 111.1(5) | 111.4(5) |
| N <sub>c</sub> -C <sub>h</sub> -N <sub>d</sub> |            | 111.79(13) | 112.4(2)   | 112.26(15) | 108.4(4) | 109.2(6) |
| N <sub>e</sub> -C <sub>i</sub> -N <sub>f</sub> |            | 112.01(12) | 112.2(2)   | 112.26(15) | 108.7(5) | 107.8(5) |

*Supporting Information*

**Table S6: Single Crystal X-Ray Parameters of 10.**

---

|                                             |                       |
|---------------------------------------------|-----------------------|
| Crystal system                              | monoclinic            |
| Space group                                 | P2 <sub>1</sub> /b11  |
| a/Å                                         | 18.3095(7)            |
| b/Å                                         | 9.4486(2)             |
| c/Å                                         | 36.0558(11)           |
| $\alpha$ /°                                 | 90                    |
| $\beta$ /°                                  | 90                    |
| $\gamma$ /°                                 | 90                    |
| Volume/Å <sup>3</sup>                       | 6237.6(3)             |
| Reflections collected                       | 10885                 |
| Independent reflections                     | 6946[R(int) = 0.1001] |
| Data/restraints/parameters                  | 6946/0/597            |
| Largest diff. peak/hole / e Å <sup>-3</sup> | 4.35/-5.34            |

---

## ***Supporting Information***

**References**

- [1] A. Hansson, J. Jensen, O. F. Wendt, K. Wärnmark, *Eur. J. Org. Chem.* **2003**, 3179–3188.
- [2] M. D. H. Bhuiyan, A. B. Mahon, P. Jensen, J. K. Clegg, A. C. Try, *Eur. J. Org. Chem.* **2009**, 687–698.
- [3] J. Jensen, K. Warnmark, *Synthesis* **2001**, 1873–1877.
- [4] J. Sturala, R. Cibulka, *Eur. J. Org. Chem.* **2012**, 7066–7074.
- [5] S. Sergeyev , F. Diederich, *Chirality* **2006**, *18*, 707–712.
- [6] D. A. Lenev, K. A. Lyssenko, R. G. Kostyanovsky, *Mendeleev Commun.*, **2006**, *16*, 138–139.
- [7] M. Delower, H. Bhuiyan, Kai-Xian Zhu, Paul Jensen, and Andrew C. Try *Eur. J. Org. Chem.* **2010**, 4662–4670.
- [8] D. Didier, B. Tylleman, N. Lambert, C. M. L. Vande Velde, F. Blockhuys, A. Collas, S. Sergeyev, *Tetrahedron* **2008**, *64*, 6252–6262.
- [9] M. Faroughi, A. C Try, P. Turner, *Acta Crystallogr., Sect. E*, **2006**, *62*, o3893-o3894.
